# Supplementary material for: Characterization of the Kenaf (Hibiscus cannabinus) Global Transcriptome Using Illumina Paired-End Sequencing and Development of EST-SSR Markers
Source: PLoS One. 2016 Mar 9;11(3):e0150548. doi: 10.1371/journal.pone.0150548 (PMC4784950; doi:10.1371/journal.pone.0150548)
Supplement: S1 Table — (XLS) [file pone.0150548.s005.xls]

## Sheet: aaaa
Table S1 Details of the 9324 EST-SSR markers developed
Marker	EST ID	SSR	FORWARD PRIMER (5′–3′)	Tm (℃)	REVERSE PRIMER (5′–3′)	Tm (℃)	PRODUCT size (bp)
Kenaf-1	CL10019.Contig5_All_3552_1	TGC(3*7)	TCTCTACTTATCACACCGTTCCC	59.535	CCGTGTTTTAGTGGACAATGTTT	60.188	85
Kenaf-2	CL10019.Contig5_All_3552_2	TGC(3*7)	TCTCTACTTATCACACCGTTCCC	59.535	ACCGTGTTTTAGTGGACAATGTT	59.725	86
Kenaf-3	CL10019.Contig5_All_3552_4	TGC(3*7)	TCTCTACTTATCACACCGTTCCC	59.535	AGACCGTGTTTTAGTGGACAATG	60.321	88
Kenaf-4	CL10022.Contig2_All_3554_1	CCTCAT(6*4)	ATCCTCATCATCATTTTCCTCCT	60.163	AACAATTTGGTCCTCCTGTTGAT	60.969	143
Kenaf-5	CL10022.Contig2_All_3554_2	CCTCAT(6*4)	ATCCTCATCATCATTTTCCTCCT	60.163	ATCAACAATTTGGTCCTCCTGTT	60.969	146
Kenaf-6	CL10022.Contig2_All_3554_3	CCTCAT(6*4)	TCCTCAGTCTCAACGTTATCCTC	59.765	AACAATTTGGTCCTCCTGTTGAT	60.969	160
Kenaf-7	CL10022.Contig2_All_3554_4	CCTCAT(6*4)	TCATCATCATTTTCCTCCTCATC	60.28	AACAATTTGGTCCTCCTGTTGAT	60.969	139
Kenaf-8	CL10022.Contig2_All_3554_5	CCTCAT(6*4)	TCATCATCATTTTCCTCCTCATC	60.28	ATCAACAATTTGGTCCTCCTGTT	60.969	142
Kenaf-9	CL10022.Contig3_All_3555_1	GATGAG(6*4)	ATGAGGAAGAAGCTGAAGAGGAG	60.503	GGCATTGAGCTTCTCCAATAATA	59.621	125
Kenaf-10	CL10022.Contig3_All_3555_2	GATGAG(6*4)	GAAGCTGAAGAGGAGAATGAGAA	59.25	CTCTTCCAGTTTCTTGTCAATGG	60.151	138
Kenaf-11	CL10022.Contig3_All_3555_3	GATGAG(6*4)	GAGGAAGAAGCTGAAGAGGAGAA	60.611	GGCATTGAGCTTCTCCAATAATA	59.621	123
Kenaf-12	CL10022.Contig3_All_3555_4	GATGAG(6*4)	GCTGAAGAGGAGAATGAGAAGAA	59.25	GGCATTGAGCTTCTCCAATAATA	59.621	114
Kenaf-13	CL10022.Contig3_All_3555_5	GATGAG(6*4)	GAAGCTGAAGAGGAGAATGAGAA	59.25	GGCATTGAGCTTCTCCAATAATA	59.621	117
Kenaf-14	CL10025.Contig21_All_3576_1	GAG(3*6)	GAAGAAGAAGTGAAGGATGGTGA	59.743	GTGAAGAAGTTGGTCTGATCCAT	59.498	99
Kenaf-15	CL10025.Contig21_All_3576_2	GAG(3*6)	GAAGAAGAAGTGAAGGATGGTGA	59.743	GATCCATCCATGTGAAGATGAAC	60.582	83
Kenaf-16	CL10025.Contig21_All_3576_3	GAG(3*6)	CTAAAAGCGATGTCATCAAAGGT	59.68	GATCCATCCATGTGAAGATGAAC	60.582	156
Kenaf-17	CL10025.Contig21_All_3576_4	GAG(3*6)	ACTAAAAGCGATGTCATCAAAGG	59.68	GATCCATCCATGTGAAGATGAAC	60.582	157
Kenaf-18	CL10025.Contig21_All_3576_5	GAG(3*6)	TGAAGAAGAAGTGAAGGATGGTG	60.646	GTGAAGAAGTTGGTCTGATCCAT	59.498	100
Kenaf-19	CL10025.Contig6_All_3565_1	AG(2*9)	GCTGAGCTAAAACCAAGAGAAAA	59.236	GATTGTTGTTTTTGGACTGCTTC	60.035	153
Kenaf-20	CL10025.Contig6_All_3565_2	AG(2*9)	GCTGAGCTAAAACCAAGAGAAAA	59.236	ACTGCTTCAGGATTACACAGGAA	60.178	138
Kenaf-21	CL10025.Contig6_All_3565_3	AG(2*9)	GCTGAGCTAAAACCAAGAGAAAA	59.236	TTTTGGATTGTTGTTTTTGGACT	59.78	158
Kenaf-22	CL10025.Contig6_All_3565_4	AG(2*9)	GCTGAGCTAAAACCAAGAGAAAA	59.236	CTGCTTCAGGATTACACAGGAAT	59.666	137
Kenaf-23	CL10025.Contig6_All_3565_5	AG(2*9)	GCTGAGCTAAAACCAAGAGAAAA	59.236	TTTTTGGACTGCTTCAGGATTAC	59.659	145
Kenaf-24	CL10027.Contig1_All_3586_1	AT(2*10)	CTTTGCTAACTTCATGCCCTCTA	59.926	ATCCTGCTGCATATCTTCACAAT	60.007	156
Kenaf-25	CL10027.Contig1_All_3586_2	AT(2*10)	CTTTGCTAACTTCATGCCCTCTA	59.926	CCTATCCTGCTGCATATCTTCAC	60.129	159
Kenaf-26	CL10027.Contig1_All_3586_3	AT(2*10)	CTTTGCTAACTTCATGCCCTCTA	59.926	GCTGCATATCTTCACAATTCACA	60.152	151
Kenaf-27	CL10027.Contig1_All_3586_4	AT(2*10)	CTTTGCTAACTTCATGCCCTCTA	59.926	TGCTGCATATCTTCACAATTCAC	60.152	152
Kenaf-28	CL10027.Contig1_All_3586_5	AT(2*10)	TGCTAACTTCATGCCCTCTAATC	59.771	ATCCTGCTGCATATCTTCACAAT	60.007	153
Kenaf-29	CL10027.Contig2_All_3587_1	AT(2*10)	CTTTGCTAACTTCATGCCCTCTA	59.926	TGAGAGAACCCACATCAATCAAT	60.738	149
Kenaf-30	CL10027.Contig2_All_3587_2	AT(2*10)	TGCTAACTTCATGCCCTCTAATC	59.771	TGAGAGAACCCACATCAATCAAT	60.738	146
Kenaf-31	CL10027.Contig2_All_3587_3	AT(2*10)	TTTGCTAACTTCATGCCCTCTAA	60.257	TGAGAGAACCCACATCAATCAAT	60.738	148
Kenaf-32	CL10027.Contig2_All_3587_4	AT(2*10)	CTTTGCTAACTTCATGCCCTCTA	59.926	CTGTGAGAGAACCCACATCAATC	60.927	152
Kenaf-33	CL10027.Contig2_All_3587_5	AT(2*10)	CTAACGATACCAGGCGAAGATTA	59.672	TGAGAGAACCCACATCAATCAAT	60.738	108
Kenaf-34	CL10049.Contig2_All_3591_1	AT(2*6)	TGTAGCTGAAACTATCCCCAGAA	60.136	TATTTGTTTCCCATTTTCCTTGA	59.715	140
Kenaf-35	CL10049.Contig2_All_3591_2	AT(2*6)	TTGTAGCTGAAACTATCCCCAGA	60.136	TATTTGTTTCCCATTTTCCTTGA	59.715	141
Kenaf-36	CL10049.Contig2_All_3591_3	AT(2*6)	TGTAGCTGAAACTATCCCCAGAA	60.136	TGAATCAGCCCTCATTTTTATTG	60.311	120
Kenaf-37	CL10049.Contig2_All_3591_4	AT(2*6)	TTGTAGCTGAAACTATCCCCAGA	60.136	TGAATCAGCCCTCATTTTTATTG	60.311	121
Kenaf-38	CL10049.Contig2_All_3591_5	AT(2*6)	TGTAGCTGAAACTATCCCCAGAA	60.136	CCTCATTTTTATTGCCAGTTGAA	60.342	111
Kenaf-39	CL10054.Contig1_All_3596_1	AGA(3*5)	GGAAAACATTGAATTTGTTGGAG	59.745	TTTAACTTTGCCGAAATTTCCTT	60.324	150
Kenaf-40	CL10054.Contig1_All_3596_2	AGA(3*5)	TTGGAGATAAAAGGAGTGAATGG	59.489	TTTAACTTTGCCGAAATTTCCTT	60.324	133
Kenaf-41	CL10054.Contig1_All_3596_3	AGA(3*5)	GGAAAACATTGAATTTGTTGGAG	59.745	TTAACTTTGCCGAAATTTCCTTC	60.76	149
Kenaf-42	CL10054.Contig1_All_3596_4	AGA(3*5)	GGAAAACATTGAATTTGTTGGAG	59.745	CCAAGATTCCTCCCTAACTCGTA	60.811	125
Kenaf-43	CL10054.Contig1_All_3596_5	AGA(3*5)	TTGGAGATAAAAGGAGTGAATGG	59.489	TTAACTTTGCCGAAATTTCCTTC	60.76	132
Kenaf-44	CL10054.Contig2_All_3597_1	CTC(3*5)	CCTTTCCTCTTCTCCTTCTCCTT	60.682	GTTTCTGCATTGTTGTTTACGGT	60.321	112
Kenaf-45	CL10054.Contig2_All_3597_2	CTC(3*5)	CCTTTCCTCTTCTCCTTCTCCTT	60.682	GTGTTTCTGCATTGTTGTTTACG	59.61	114
Kenaf-46	CL10054.Contig2_All_3597_3	CTC(3*5)	CCTTTCCTCTTCTCCTTCTCCTT	60.682	CGTGTTTCTGCATTGTTGTTTAC	59.61	115
Kenaf-47	CL10054.Contig2_All_3597_4	CTC(3*5)	CTTTCCTCTTCTCCTTCTCCTTC	59.154	GTTTCTGCATTGTTGTTTACGGT	60.321	111
Kenaf-48	CL10054.Contig2_All_3597_5	CTC(3*5)	CTTTCCTCTTCTCCTTCTCCTTC	59.154	GTGTTTCTGCATTGTTGTTTACG	59.61	113
Kenaf-49	CL1006.Contig1_All_856_1	TA(2*6)	TGCTTCTCTGATCATCCCTTAAA	60.21	ACTTTGGCAGAGGGTTTAGTGTT	60.434	152
Kenaf-50	CL1006.Contig1_All_856_2	TA(2*6)	TGCTTCTCTGATCATCCCTTAAA	60.21	AACTTTGGCAGAGGGTTTAGTGT	60.434	153
Kenaf-51	CL1006.Contig1_All_856_3	TA(2*6)	TCTGCTTCTCTGATCATCCCTTA	60.346	ACTTTGGCAGAGGGTTTAGTGTT	60.434	154
Kenaf-52	CL1006.Contig1_All_856_4	TA(2*6)	TCTGCTTCTCTGATCATCCCTTA	60.346	AACTTTGGCAGAGGGTTTAGTGT	60.434	155
Kenaf-53	CL1006.Contig1_All_856_5	TA(2*6)	TGCTTCTCTGATCATCCCTTAAA	60.21	CAGAGGGTTTAGTGTTGGGTTTT	60.633	145
Kenaf-54	CL10080.Contig2_All_3599_1	ACA(3*6)	GTGTGAGGAAATCGATGAACATT	60.243	AACACGATAGTTGCGAATACGAC	60.435	120
Kenaf-55	CL10080.Contig2_All_3599_2	ACA(3*6)	GTGTGAGGAAATCGATGAACATT	60.243	TACGACCCTTTGATCTCGTAAAC	59.552	103
Kenaf-56	CL10080.Contig2_All_3599_3	ACA(3*6)	TTAACAAAAACTGCTTGGCCTAC	59.727	AACACGATAGTTGCGAATACGAC	60.435	96
Kenaf-57	CL10080.Contig2_All_3599_4	ACA(3*6)	GTGTGAGGAAATCGATGAACATT	60.243	GAATACGACCCTTTGATCTCGTA	59.515	106
Kenaf-58	CL10080.Contig2_All_3599_5	ACA(3*6)	TTAACAAAAACTGCTTGGCCTAC	59.727	GAATACGACCCTTTGATCTCGTA	59.515	82
Kenaf-59	CL10102.Contig1_All_3610_1	CAG(3*5)	ATCTGAACCCAAAACAAGAACAA	59.9	GTGAGGGTACATCATCATCTGCT	60.405	152
Kenaf-60	CL10102.Contig1_All_3610_2	CAG(3*5)	GATCTGAACCCAAAACAAGAACA	60.379	GTGAGGGTACATCATCATCTGCT	60.405	153
Kenaf-61	CL10102.Contig1_All_3610_3	CAG(3*5)	TGATCTGAACCCAAAACAAGAAC	60.379	GTGAGGGTACATCATCATCTGCT	60.405	154
Kenaf-62	CL10102.Contig1_All_3610_4	CAG(3*5)	CTGAACCCAAAACAAGAACAAGA	60.53	CCATGTAATGGTGAGGGTACATC	60.366	160
Kenaf-63	CL10102.Contig1_All_3610_5	CAG(3*5)	CTGATCTGAACCCAAAACAAGAA	60.5	GTGAGGGTACATCATCATCTGCT	60.405	155
Kenaf-64	CL10107.Contig3_All_3611_1	ATT(3*5)	CCAGAGATTCCCGAGCTTACTAT	60.121	GATTACGGTGTTCTCAAAACCAG	59.92	148
Kenaf-65	CL10107.Contig3_All_3611_2	ATT(3*5)	CCAGAGATTCCCGAGCTTACTAT	60.121	AGATTACGGTGTTCTCAAAACCA	59.92	149
Kenaf-66	CL10107.Contig3_All_3611_3	ATT(3*5)	GCCTTAAGCTCATTAATCTGCAA	59.903	ATTACAATACTCTCCGCCATGAA	59.877	147
Kenaf-67	CL10107.Contig3_All_3611_4	ATT(3*5)	GCCTTAAGCTCATTAATCTGCAA	59.903	AATTACAATACTCTCCGCCATGA	59.877	148
Kenaf-68	CL10107.Contig3_All_3611_5	ATT(3*5)	GCCTTAAGCTCATTAATCTGCAA	59.903	TCAATTACAATACTCTCCGCCAT	59.877	150
Kenaf-69	CL1010.Contig2_All_858_1	GAA(3*5)	CAGTGGTGATCCGTAAAACAAGT	60.321	TGCATTGCATTTCTGAATTTATG	59.982	159
Kenaf-70	CL1010.Contig2_All_858_2	GAA(3*5)	GGTGATCCGTAAAACAAGTATGG	59.659	TGCATTGCATTTCTGAATTTATG	59.982	155
Kenaf-71	CL1010.Contig2_All_858_3	GAA(3*5)	CAGTGGTGATCCGTAAAACAAGT	60.321	GCATTTCTGAATTTATGCAAACC	59.87	153
Kenaf-72	CL1010.Contig2_All_858_4	GAA(3*5)	GGTGATCCGTAAAACAAGTATGG	59.659	GCATTTCTGAATTTATGCAAACC	59.87	149
Kenaf-73	CL1010.Contig2_All_858_5	GAA(3*5)	TGGTGATCCGTAAAACAAGTATG	58.932	TGCATTGCATTTCTGAATTTATG	59.982	156
Kenaf-74	CL10112.Contig1_All_3612_1	TTTC(4*6)	AGGGTGGCACCATTATATAGCTT	60.127	TGAAACTCTTCCTCATCATCTCC	59.705	146
Kenaf-75	CL10112.Contig1_All_3612_2	TTTC(4*6)	GGTGGCACCATTATATAGCTTCA	60.233	TGAAACTCTTCCTCATCATCTCC	59.705	144
Kenaf-76	CL10112.Contig1_All_3612_3	TTTC(4*6)	AGGGTGGCACCATTATATAGCTT	60.127	GAAACTCTTCCTCATCATCTCCC	60.441	145
Kenaf-77	CL10112.Contig1_All_3612_4	TTTC(4*6)	AGGGTGGCACCATTATATAGCTT	60.127	ACTCTTCCTCATCATCTCCCAGT	60.505	142
Kenaf-78	CL10112.Contig1_All_3612_5	TTTC(4*6)	GGTGGCACCATTATATAGCTTCA	60.233	GAAACTCTTCCTCATCATCTCCC	60.441	143
Kenaf-79	CL10112.Contig2_All_3613_1	GAAA(4*6)	TGAAACTCTTCCTCATCATCTCC	59.705	AGGGTGGCACCATTATATAGCTT	60.127	146
Kenaf-80	CL10112.Contig2_All_3613_2	GAAA(4*6)	TGAAACTCTTCCTCATCATCTCC	59.705	GGTGGCACCATTATATAGCTTCA	60.233	144
Kenaf-81	CL10112.Contig2_All_3613_3	GAAA(4*6)	GAAACTCTTCCTCATCATCTCCC	60.441	AGGGTGGCACCATTATATAGCTT	60.127	145
Kenaf-82	CL10112.Contig2_All_3613_4	GAAA(4*6)	ACTCTTCCTCATCATCTCCCAGT	60.505	AGGGTGGCACCATTATATAGCTT	60.127	142
Kenaf-83	CL10112.Contig2_All_3613_5	GAAA(4*6)	GAAACTCTTCCTCATCATCTCCC	60.441	GGTGGCACCATTATATAGCTTCA	60.233	143
Kenaf-84	CL10131.Contig1_All_3619_1	CA(2*6)	CATCTCCAATACCCCTATCATCA	60.048	TCTGCCATGATTTTTCTTTCAAT	59.963	92
Kenaf-85	CL10131.Contig1_All_3619_2	CA(2*6)	CATCTCCAATACCCCTATCATCA	60.048	TGTCTCTGCCATGATTTTTCTTT	60.122	96
Kenaf-86	CL10131.Contig1_All_3619_3	CA(2*6)	CATCTCCAATACCCCTATCATCA	60.048	TGCCATGATTTTTCTTTCAATTT	59.844	90
Kenaf-87	CL10131.Contig1_All_3619_4	CA(2*6)	TCTCCAATACCCCTATCATCAGA	59.806	TCTGCCATGATTTTTCTTTCAAT	59.963	90
Kenaf-88	CL10131.Contig1_All_3619_5	CA(2*6)	CATCTCCAATACCCCTATCATCA	60.048	CTGTCTCTGCCATGATTTTTCTT	59.776	97
Kenaf-89	CL10131.Contig1_All_3620_1	A(1*22)	CATCTCCAATACCCCTATCATCA	60.048	TGTCTCTGCCATGATTTTTCTTT	60.122	96
Kenaf-90	CL10131.Contig1_All_3620_2	A(1*22)	CATCTCCAATACCCCTATCATCA	60.048	CTGTCTCTGCCATGATTTTTCTT	59.776	97
Kenaf-91	CL10131.Contig1_All_3620_3	A(1*22)	TCTCCAATACCCCTATCATCAGA	59.806	TGTCTCTGCCATGATTTTTCTTT	60.122	94
Kenaf-92	CL10131.Contig1_All_3620_4	A(1*22)	CATCTCCAATACCCCTATCATCA	60.048	GGTCTAGAGTTGCTTGCTGTCTC	59.718	113
Kenaf-93	CL10131.Contig1_All_3620_5	A(1*22)	TCTCCAATACCCCTATCATCAGA	59.806	CTGTCTCTGCCATGATTTTTCTT	59.776	95
Kenaf-94	CL10133.Contig2_All_3621_1	CTTTT(5*4)	CATCTTCTTCTTCCTCTTCACCA	59.872	TTCCTTCCTTTCTTCCATTCTTC	60.063	131
Kenaf-95	CL10133.Contig2_All_3621_2	CTTTT(5*4)	CATCTTCTTCTTCCTCTTCACCA	59.872	TTCTTCCTTCCTTTCTTCCATTC	60.063	134
Kenaf-96	CL10133.Contig2_All_3621_3	CTTTT(5*4)	CATCTTCTTCTTCCTCTTCACCA	59.872	TAACTGCCTTTCTTCCTTCCTTT	59.793	143
Kenaf-97	CL10133.Contig2_All_3621_4	CTTTT(5*4)	CATCTTCTTCTTCCTCTTCACCA	59.872	TCTTCCTTCCTTTCTTCCATTCT	59.729	133
Kenaf-98	CL10133.Contig2_All_3621_5	CTTTT(5*4)	CATCTTCTTCTTCCTCTTCACCA	59.872	CTTTCTTCCATTCTTCCAAAACC	60.32	124
Kenaf-99	CL10137.Contig3_All_3623_1	CTGTGG(6*4)	ATCACCAACATTGTGATGAGTTG	59.772	CACTGCATCTCTCAAGTCTCCAT	60.832	132
Kenaf-100	CL10137.Contig3_All_3623_2	CTGTGG(6*4)	ATCACCAACATTGTGATGAGTTG	59.772	CTGCATCTCTCAAGTCTCCATTA	58.616	130
Kenaf-101	CL10137.Contig3_All_3623_3	CTGTGG(6*4)	CAACATTGTGATGAGTTGAACGA	60.968	CTTCTTTCTGCACTGCATCTCTC	60.695	137
Kenaf-102	CL10137.Contig3_All_3623_4	CTGTGG(6*4)	CACCAACATTGTGATGAGTTGAA	60.832	CACTGCATCTCTCAAGTCTCCAT	60.832	130
Kenaf-103	CL10137.Contig3_All_3623_5	CTGTGG(6*4)	AACATTGTGATGAGTTGAACGAC	59.021	CTTCTTTCTGCACTGCATCTCTC	60.695	136
Kenaf-104	CL10147.Contig1_All_3627_4	TCC(3*5)	AAAACTTATCCTCTATGCCACCA	59.07	TGATGAAGATGTCGAAGATGATG	60.088	143
Kenaf-105	CL10147.Contig3_All_3629_1	GGA(3*6)	TCCCCTCGAACAATTAGGTTTAT	60.083	CACCATCTTCATCTCCTTCATTC	59.954	122
Kenaf-106	CL10147.Contig3_All_3629_2	GGA(3*6)	ATCCCCTCGAACAATTAGGTTTA	60.083	CACCATCTTCATCTCCTTCATTC	59.954	123
Kenaf-107	CL10147.Contig3_All_3629_3	GGA(3*6)	TCCCCTCGAACAATTAGGTTTAT	60.083	CTCTATGCCACCATCTTCATCTC	60.11	130
Kenaf-108	CL10147.Contig3_All_3629_4	GGA(3*6)	ATCCCCTCGAACAATTAGGTTTA	60.083	CTCTATGCCACCATCTTCATCTC	60.11	131
Kenaf-109	CL10151.Contig1_All_3630_1	CGA(3*6)	TCTCAAAGCCGAATACAGAGAAC	59.906	CCTCTCCTCCTAGCCAAGTATTC	59.769	111
Kenaf-110	CL10151.Contig1_All_3630_2	CGA(3*6)	TTCTCAAAGCCGAATACAGAGAA	60.369	CCTCTCCTCCTAGCCAAGTATTC	59.769	112
Kenaf-111	CL10151.Contig1_All_3630_3	CGA(3*6)	CGAATACAGAGAACACGACAAGA	59.434	TCTCTTCCTTTCAAAGTCCTTCC	60.221	153
Kenaf-112	CL10151.Contig1_All_3630_4	CGA(3*6)	CGAATACAGAGAACACGACAAGA	59.434	CCTCTCCTCCTAGCCAAGTATTC	59.769	102
Kenaf-113	CL10151.Contig1_All_3630_5	CGA(3*6)	ATACAGAGAACACGACAAGACCG	60.594	TCTCTTCCTTTCAAAGTCCTTCC	60.221	150
Kenaf-114	CL10151.Contig2_All_3631_1	ATATGG(6*4)	TGCTAGCAATCTCAAAACAATGA	59.903	TTTAGAGCAAGAAATGGCAAAAT	59.326	99
Kenaf-115	CL10151.Contig2_All_3631_2	ATATGG(6*4)	TGCTAGCAATCTCAAAACAATGA	59.903	ATTTAGAGCAAGAAATGGCAAAA	59.326	100
Kenaf-116	CL10151.Contig2_All_3631_3	ATATGG(6*4)	TGCTAGCAATCTCAAAACAATGA	59.903	CATATTTAGAGCAAGAAATGGCAA	59.677	103
Kenaf-117	CL10151.Contig2_All_3631_4	ATATGG(6*4)	TGCTAGCAATCTCAAAACAATGA	59.903	ATTTAGAGCAAGAAATGGCAAAAT	59.583	100
Kenaf-118	CL10151.Contig2_All_3631_5	ATATGG(6*4)	CTGCTAGCAATCTCAAAACAATG	59.088	TTTAGAGCAAGAAATGGCAAAAT	59.326	100
Kenaf-119	CL10151.Contig2_All_3632_1	GAA(3*6)	GGATATGGATATGGATATGGCAA	59.76	AAACAGGATTCGAAGATTAACCC	59.745	156
Kenaf-120	CL10151.Contig2_All_3632_2	GAA(3*6)	GGATATGGATATGGATATGGCAA	59.76	AGGATTCGAAGATTAACCCAAGA	60.308	152
Kenaf-121	CL10151.Contig2_All_3632_3	GAA(3*6)	TAAAATTTTGCCATTTCTTGCTC	59.65	AAACAGGATTCGAAGATTAACCC	59.745	132
Kenaf-122	CL10151.Contig2_All_3632_4	GAA(3*6)	TAAAATTTTGCCATTTCTTGCTC	59.65	AGGATTCGAAGATTAACCCAAGA	60.308	128
Kenaf-123	CL10151.Contig2_All_3632_5	GAA(3*6)	AAAATTTTGCCATTTCTTGCTCT	60.456	AAACAGGATTCGAAGATTAACCC	59.745	131
Kenaf-124	CL10160.Contig1_All_3633_1	TTTC(4*5)	ATGACAAATGGATCAAAGCATCT	59.855	AGATTCGAAAAAGGAGAAAGACG	60.236	155
Kenaf-125	CL10160.Contig1_All_3633_2	TTTC(4*5)	ATGACAAATGGATCAAAGCATCT	59.855	AGGAGAAAGACGTGAGGAAAAAG	60.273	144
Kenaf-126	CL10160.Contig1_All_3633_3	TTTC(4*5)	TGACAAATGGATCAAAGCATCTA	59.6	AGATTCGAAAAAGGAGAAAGACG	60.236	154
Kenaf-127	CL10160.Contig1_All_3633_4	TTTC(4*5)	TGACAAATGGATCAAAGCATCTA	59.6	AGGAGAAAGACGTGAGGAAAAAG	60.273	143
Kenaf-128	CL10160.Contig1_All_3633_5	TTTC(4*5)	ATGACAAATGGATCAAAGCATCT	59.855	AAGGAGAAAGACGTGAGGAAAAA	60.604	145
Kenaf-129	CL1022.Contig1_All_863_1	GA(2*6)	AGTCCCAATTTTAGACCTCGTTC	59.894	TTCAAGGACTTCCCAGTTTATGA	59.987	139
Kenaf-130	CL1022.Contig1_All_863_2	GA(2*6)	GAAGTCCCAATTTTAGACCTCGT	59.894	TTCAAGGACTTCCCAGTTTATGA	59.987	141
Kenaf-131	CL1022.Contig1_All_863_3	GA(2*6)	CGTTCGCATAAATATTCAACCTC	59.884	TTCAAGGACTTCCCAGTTTATGA	59.987	121
Kenaf-132	CL1022.Contig1_All_863_4	GA(2*6)	TCGTTCGCATAAATATTCAACCT	59.884	TTCAAGGACTTCCCAGTTTATGA	59.987	122
Kenaf-133	CL1022.Contig1_All_863_5	GA(2*6)	CCTTTTTAACAGTTGGTCACACC	59.827	TTCAAGGACTTCCCAGTTTATGA	59.987	83
Kenaf-134	CL1022.Contig3_All_865_1	AT(2*10)	GCACGAATATTCAATCTCCTTTG	59.983	GAAAATTTCATGGACTTGCTCAG	60.122	147
Kenaf-135	CL1022.Contig3_All_865_2	AT(2*10)	GCACGAATATTCAATCTCCTTTG	59.983	TCATGGACTTGCTCAGTTTATCA	59.761	140
Kenaf-136	CL1022.Contig3_All_865_3	AT(2*10)	CACGAATATTCAATCTCCTTTGG	59.851	GAAAATTTCATGGACTTGCTCAG	60.122	146
Kenaf-137	CL1022.Contig3_All_865_4	AT(2*10)	CACGAATATTCAATCTCCTTTGG	59.851	TCATGGACTTGCTCAGTTTATCA	59.761	139
Kenaf-138	CL1022.Contig3_All_865_5	AT(2*10)	GCACGAATATTCAATCTCCTTTG	59.983	AATTTCATGGACTTGCTCAGTTT	59.19	144
Kenaf-139	CL1024.Contig2_All_867_1	CCT(3*5)	AATCTTGAGCCTACCCAATTACC	59.765	GAGTCAAAGGAGTCTTGGGTTTC	60.503	127
Kenaf-140	CL1024.Contig2_All_867_2	CCT(3*5)	AATCTTGAGCCTACCCAATTACC	59.765	GAGAGGAGTCAAAGGAGTCTTGG	60.768	132
Kenaf-141	CL1024.Contig2_All_867_3	CCT(3*5)	AATCTTGAGCCTACCCAATTACC	59.765	GGAGAGGAGTCAAAGGAGTCTTG	60.768	133
Kenaf-142	CL1024.Contig2_All_867_4	CCT(3*5)	GCAGAATGACAATCTTGAGCCTA	60.755	GAGTCAAAGGAGTCTTGGGTTTC	60.503	137
Kenaf-143	CL1024.Contig2_All_867_5	CCT(3*5)	CAATCTTGAGCCTACCCAATTAC	59.07	GAGTCAAAGGAGTCTTGGGTTTC	60.503	128
Kenaf-144	CL1024.Contig5_All_869_1	AGG(3*5)	GAGTCAAAGGAGTCTTGGGTTTC	60.503	AATCTTGAGCCTACCCAATTACC	59.765	127
Kenaf-145	CL1024.Contig5_All_869_2	AGG(3*5)	GAGAGGAGTCAAAGGAGTCTTGG	60.768	AATCTTGAGCCTACCCAATTACC	59.765	132
Kenaf-146	CL1024.Contig5_All_869_3	AGG(3*5)	GGAGAGGAGTCAAAGGAGTCTTG	60.768	AATCTTGAGCCTACCCAATTACC	59.765	133
Kenaf-147	CL1024.Contig5_All_869_4	AGG(3*5)	GAGTCAAAGGAGTCTTGGGTTTC	60.503	GCAGAATGACAATCTTGAGCCTA	60.755	137
Kenaf-148	CL1024.Contig5_All_869_5	AGG(3*5)	GAGTCAAAGGAGTCTTGGGTTTC	60.503	CAATCTTGAGCCTACCCAATTAC	59.07	128
Kenaf-149	CL1035.Contig15_All_879_1	GAT(3*5)	TAAATCTGTGCTTCCAACAAACA	59.677	AATACTCAACAACACAGCCACCT	59.978	149
Kenaf-150	CL1035.Contig15_All_879_2	GAT(3*5)	ATCGATAAATCTGTGCTTCCAAC	59.519	AATACTCAACAACACAGCCACCT	59.978	154
Kenaf-151	CL1035.Contig15_All_879_3	GAT(3*5)	CTTCCAACAAACATTGAACAGGT	60.301	CAGAATACTCAACAACACAGCCA	60.218	142
Kenaf-152	CL1035.Contig15_All_879_4	GAT(3*5)	TAAATCTGTGCTTCCAACAAACA	59.677	CAGAATACTCAACAACACAGCCA	60.218	152
Kenaf-153	CL1035.Contig15_All_879_5	GAT(3*5)	CTTCCAACAAACATTGAACAGGT	60.301	TACTCAACAACACAGCCACCTAA	59.724	137
Kenaf-154	CL1035.Contig15_All_880_1	GGA(3*5)	AGGTGGCTGTGTTGTTGAGTATT	59.978	ATCATCTTCATGCTCATCCTCAT	59.946	139
Kenaf-155	CL1035.Contig15_All_880_2	GGA(3*5)	AGGTGGCTGTGTTGTTGAGTATT	59.978	TCATTGTCATCATCTTCATGCTC	60.096	147
Kenaf-156	CL1035.Contig15_All_880_3	GGA(3*5)	AGGTGGCTGTGTTGTTGAGTATT	59.978	TCACCATCATTGTCATCATCTTC	59.811	153
Kenaf-157	CL1035.Contig15_All_880_4	GGA(3*5)	TGGCTGTGTTGTTGAGTATTCTG	60.218	ATCATCTTCATGCTCATCCTCAT	59.946	136
Kenaf-158	CL1035.Contig15_All_880_5	GGA(3*5)	TGGCTGTGTTGTTGAGTATTCTG	60.218	TTGTCATCATCTTCATGCTCATC	60.096	141
Kenaf-159	CL1037.Contig8_All_881_1	AT(2*10)	TAAATTCAATTCATTTCCTCCCC	60.354	CTTTGCTAACTTCATGCCCTCTA	59.926	124
Kenaf-160	CL1037.Contig8_All_881_2	AT(2*10)	TAAATTCAATTCATTTCCTCCCC	60.354	TGCTAACTTCATGCCCTCTAATC	59.771	121
Kenaf-161	CL1037.Contig8_All_881_3	AT(2*10)	TAAATTCAATTCATTTCCTCCCC	60.354	TTTGCTAACTTCATGCCCTCTAA	60.257	123
Kenaf-162	CL1037.Contig8_All_881_4	AT(2*10)	TAAATTCAATTCATTTCCTCCCC	60.354	CTAACGATACCAGGCGAAGATTA	59.672	83
Kenaf-163	CL1037.Contig8_All_881_5	AT(2*10)	TAAATTCAATTCATTTCCTCCCC	60.354	TGGAGAGTTCTAACGATACCAGG	59.661	92
Kenaf-164	CL1046.Contig5_All_882_1	CT(2*7)	CGTAACGTAAAGCAAAGATCCTG	60.185	TTTCCTTGTATTCATGTATGGGG	59.957	93
Kenaf-165	CL1046.Contig5_All_882_2	CT(2*7)	CGTAAAGCAAAGATCCTGAAAAA	59.79	TTTCCTTGTATTCATGTATGGGG	59.957	88
Kenaf-166	CL1046.Contig5_All_882_3	CT(2*7)	AGCAAAGATCCTGAAAAACCAAT	60.346	TTTCCTTGTATTCATGTATGGGG	59.957	83
Kenaf-167	CL1046.Contig5_All_882_4	CT(2*7)	CGTAAAGCAAAGATCCTGAAAAA	59.79	GTGAATCTGTGTTATTTGGACCC	59.628	156
Kenaf-168	CL1046.Contig5_All_882_5	CT(2*7)	CGTAACGTAAAGCAAAGATCCTG	60.185	TCCTTGTATTCATGTATGGGGTT	59.493	91
Kenaf-169	CL104.Contig2_All_141_1	ATC(3*5)	TTTTGAAACTAACTTAGCACGGG	59.722	AAGAGATTGATTGGCCAGAAGAT	60.449	152
Kenaf-170	CL104.Contig2_All_141_2	ATC(3*5)	TTTGAAACTAACTTAGCACGGGT	59.275	AAGAGATTGATTGGCCAGAAGAT	60.449	151
Kenaf-171	CL104.Contig2_All_141_3	ATC(3*5)	TTTGAAACTAACTTAGCACGGGT	59.275	GTCCTGAACTTGGTGGTCATAAT	59.272	124
Kenaf-172	CL104.Contig2_All_141_4	ATC(3*5)	TTTTGAAACTAACTTAGCACGGG	59.722	AAGAGATTGATTGGCCAGAAGA	60.208	152
Kenaf-173	CL104.Contig2_All_141_5	ATC(3*5)	TTTTGAAACTAACTTAGCACGGG	59.722	GAAGAGATTGATTGGCCAGAAG	60.208	153
Kenaf-174	CL104.Contig2_All_142_1	CTC(3*7)	AGGATCAAGAGAGAAATCCAACC	59.96	GAACGAGATGGAAAATGAAAGTG	59.994	139
Kenaf-175	CL104.Contig2_All_142_2	CTC(3*7)	TCAGGATCAAGAGAGAAATCCAA	60.194	GAACGAGATGGAAAATGAAAGTG	59.994	141
Kenaf-176	CL104.Contig2_All_142_3	CTC(3*7)	AGGATCAAGAGAGAAATCCAACC	59.96	GAAGAGAACGAGATGGAAAATGA	59.717	144
Kenaf-177	CL104.Contig2_All_142_4	CTC(3*7)	AGGATCAAGAGAGAAATCCAACC	59.96	AGGAAGAGAACGAGATGGAAAAT	59.628	146
Kenaf-178	CL104.Contig2_All_142_5	CTC(3*7)	TCAGGATCAAGAGAGAAATCCAA	60.194	GAAGAGAACGAGATGGAAAATGA	59.717	146
Kenaf-179	CL104.Contig3_All_143_1	GAG(3*7)	GAACGAGATGGAAAATGAAAGTG	59.994	AGGATCAAGAGAGAAATCCAACC	59.96	139
Kenaf-180	CL104.Contig3_All_143_2	GAG(3*7)	GAACGAGATGGAAAATGAAAGTG	59.994	TCAGGATCAAGAGAGAAATCCAA	60.194	141
Kenaf-181	CL104.Contig3_All_143_3	GAG(3*7)	GAAGAGAACGAGATGGAAAATGA	59.717	AGGATCAAGAGAGAAATCCAACC	59.96	144
Kenaf-182	CL104.Contig3_All_143_4	GAG(3*7)	AGGAAGAGAACGAGATGGAAAAT	59.628	AGGATCAAGAGAGAAATCCAACC	59.96	146
Kenaf-183	CL104.Contig3_All_143_5	GAG(3*7)	GAAGAGAACGAGATGGAAAATGA	59.717	TCAGGATCAAGAGAGAAATCCAA	60.194	146
Kenaf-184	CL1058.Contig2_All_886_1	AG(2*10)	CGATGAGTTTTCAATAGAATCGG	59.977	GGTAGATTTCTCACCTCCGTACC	60.248	131
Kenaf-185	CL1058.Contig2_All_886_2	AG(2*10)	GCGATGAGTTTTCAATAGAATCG	60.108	GGTAGATTTCTCACCTCCGTACC	60.248	132
Kenaf-186	CL1058.Contig2_All_886_3	AG(2*10)	CGATGAGTTTTCAATAGAATCGG	59.977	AAAGGTAGATTTCTCACCTCCGT	59.559	134
Kenaf-187	CL1058.Contig2_All_886_4	AG(2*10)	CGATGAGTTTTCAATAGAATCGG	59.977	GTAGATTTCTCACCTCCGTACCA	59.535	130
Kenaf-188	CL1058.Contig2_All_886_5	AG(2*10)	GCGATGAGTTTTCAATAGAATCG	60.108	AAAGGTAGATTTCTCACCTCCGT	59.559	135
Kenaf-189	CL1077.Contig5_All_927_1	AG(2*6)	TATGCTGCTCTAAAAGATGAGGG	59.891	ATAGAGGTAACACCCTGAGGAGC	60.035	135
Kenaf-190	CL1077.Contig5_All_927_2	AG(2*6)	AAGACACCTGCTGAAGTTTATGC	59.839	ATAGAGGTAACACCCTGAGGAGC	60.035	153
Kenaf-191	CL1077.Contig5_All_927_4	AG(2*6)	ATGTGAAGACACCTGCTGAAGTT	60.224	ATAGAGGTAACACCCTGAGGAGC	60.035	158
Kenaf-192	CL1077.Contig5_All_927_5	AG(2*6)	ATGTGAAGACACCTGCTGAAGTT	60.224	ATTTCATCCACGTCAGAAGCTAA	60.143	118
Kenaf-193	CL107.Contig1_All_144_1	TTC(3*6)	AGGCATGGTCTACTCCAGAAAA	60.13	TTTGGCTTTCTGTCTTCTTGTTC	59.92	99
Kenaf-194	CL107.Contig1_All_144_2	TTC(3*6)	AGGCATGGTCTACTCCAGAAAA	60.13	TTTTGTGTTTGGCTTTCTGTCTT	60.188	106
Kenaf-195	CL107.Contig1_All_144_3	TTC(3*6)	AGAGGCATGGTCTACTCCAGAA	60.268	TTTGGCTTTCTGTCTTCTTGTTC	59.92	101
Kenaf-196	CL107.Contig1_All_144_4	TTC(3*6)	AGGCATGGTCTACTCCAGAAAA	60.13	GTTTTGTGTTTGGCTTTCTGTCT	59.725	107
Kenaf-197	CL107.Contig1_All_144_5	TTC(3*6)	GAATCAGAGGCATGGTCTACTCC	61.355	TTTGGCTTTCTGTCTTCTTGTTC	59.92	106
Kenaf-198	CL107.Contig2_All_145_1	AAG(3*6)	GAACAATTCAAGCACTCAATTCC	60	TGGTCTACTCCAGAAAACAAAACA	60.069	140
Kenaf-199	CL107.Contig2_All_145_2	AAG(3*6)	GAACAATTCAAGCACTCAATTCC	60	AGGCATGGTCTACTCCAGAAAA	60.13	145
Kenaf-200	CL107.Contig2_All_145_3	AAG(3*6)	ACAATTCAAGCACTCAATTCCAT	59.891	TGGTCTACTCCAGAAAACAAAACA	60.069	138
Kenaf-201	CL107.Contig2_All_145_4	AAG(3*6)	ACAATTCAAGCACTCAATTCCAT	59.891	AGGCATGGTCTACTCCAGAAAA	60.13	143
Kenaf-202	CL107.Contig2_All_145_5	AAG(3*6)	GAACAATTCAAGCACTCAATTCC	60	AGAGGCATGGTCTACTCCAGAA	60.268	147
Kenaf-203	CL107.Contig3_All_146_1	TTC(3*6)	TGGTCTACTCCAGAAAACAAAACA	60.069	ATAACTACATAGACGCGGAAGCA	60.18	153
Kenaf-204	CL107.Contig3_All_146_2	TTC(3*6)	AGGCATGGTCTACTCCAGAAAA	60.13	ATAACTACATAGACGCGGAAGCA	60.18	158
Kenaf-205	CL107.Contig3_All_146_3	TTC(3*6)	TGGTCTACTCCAGAAAACAAAACA	60.069	ACAAACACTATCAGTCTCGAGGG	59.69	113
Kenaf-206	CL107.Contig3_All_146_4	TTC(3*6)	AGGCATGGTCTACTCCAGAAAA	60.13	ACAAACACTATCAGTCTCGAGGG	59.69	118
Kenaf-207	CL107.Contig3_All_146_5	TTC(3*6)	AGAGGCATGGTCTACTCCAGAA	60.268	ATAACTACATAGACGCGGAAGCA	60.18	160
Kenaf-208	CL1086.Contig3_All_929_1	CA(2*6)	TTAGCAGACATCCTTCATGACAA	59.761	ACAAAGCTGCAGGTACAAAAGAA	60.333	157
Kenaf-209	CL1086.Contig3_All_929_2	CA(2*6)	TTAGCAGACATCCTTCATGACAA	59.761	AAAGCTGCAGGTACAAAAGAAAA	59.502	155
Kenaf-210	CL1086.Contig3_All_929_3	CA(2*6)	TTAGCAGACATCCTTCATGACAA	59.761	TGCAGGTACAAAAGAAAAGGATG	60.506	150
Kenaf-211	CL1086.Contig3_All_929_4	CA(2*6)	TTAGCAGACATCCTTCATGACAA	59.761	TATAACAATCCAAAAAGGTGGCA	60.567	127
Kenaf-212	CL1086.Contig3_All_929_5	CA(2*6)	TCTGATTCTTTTCCTTTTTGGAA	59.256	TAAAACACAAAGCTGCAGGTACA	59.865	114
Kenaf-213	CL108.Contig1_All_147_1	CT(2*6)	CTTTTTACCAAGTAAATGGTGCG	59.944	ATAACACGACACTCGACAAACCT	59.978	101
Kenaf-214	CL108.Contig1_All_147_2	CT(2*6)	CTGCAATAACCTTGTTAAGCTGG	60.185	ATAACACGACACTCGACAAACCT	59.978	128
Kenaf-215	CL108.Contig1_All_147_3	CT(2*6)	CTGCAATAACCTTGTTAAGCTGG	60.185	GTCATAACAATGTAGAAAGCGGC	60.043	94
Kenaf-216	CL108.Contig1_All_147_4	CT(2*6)	AACGCTGCAATAACCTTGTTAAG	59.747	ATAACACGACACTCGACAAACCT	59.978	132
Kenaf-217	CL108.Contig1_All_147_5	CT(2*6)	CTTTTTACCAAGTAAATGGTGCG	59.944	TAACACGACACTCGACAAACCTA	59.724	100
Kenaf-218	CL1108.Contig1_All_932_1	AGA(3*5)	TCTGCCTGCAACCTTTATTATGT	60.036	TCTCAAATCAAAACCCATCATTC	60.177	120
Kenaf-219	CL1108.Contig1_All_932_2	AGA(3*5)	ATTAGAATCCTGGAAATTCTGCC	59.833	TCTCAAATCAAAACCCATCATTC	60.177	137
Kenaf-220	CL1108.Contig1_All_932_3	AGA(3*5)	AAATTCTGCCTGCAACCTTTATT	60.357	TCTCAAATCAAAACCCATCATTC	60.177	124
Kenaf-221	CL1108.Contig1_All_932_4	AGA(3*5)	TTAGAATCCTGGAAATTCTGCCT	60.43	TCTCAAATCAAAACCCATCATTC	60.177	136
Kenaf-222	CL1108.Contig1_All_932_5	AGA(3*5)	TCTGCCTGCAACCTTTATTATGT	60.036	TGTCTCAAATCAAAACCCATCAT	60.587	122
Kenaf-223	CL1148.Contig5_All_935_1	AAATA(5*4)	AAGCCGAAAGACTCAAAAAGTTC	60.274	TCAAAACAAATCTACCAATGGTCT	58.973	160
Kenaf-224	CL1148.Contig5_All_935_2	AAATA(5*4)	AAGCCGAAAGACTCAAAAAGTTC	60.274	TCAAAACAAATCTACCAATGGTCTT	60.151	160
Kenaf-225	CL1148.Contig5_All_935_3	AAATA(5*4)	GAAAGACTCAAAAAGTTCGACCC	60.49	TCAAAACAAATCTACCAATGGTCT	58.973	155
Kenaf-226	CL1148.Contig5_All_935_4	AAATA(5*4)	AAGCCGAAAGACTCAAAAAGTTC	60.274	CAAAACAAATCTACCAATGGTCTTT	59.723	159
Kenaf-227	CL1148.Contig5_All_935_5	AAATA(5*4)	GAAGCCGAAAGACTCAAAAAGTT	60.274	CAAAACAAATCTACCAATGGTCTTT	59.723	160
Kenaf-228	CL1158.Contig2_All_940_1	AGC(3*5)	GCACATCGAAAATCGGATAATAG	59.85	CCCAACATAAATCACCTCAACAT	59.994	141
Kenaf-229	CL1158.Contig2_All_940_2	AGC(3*5)	GCACATCGAAAATCGGATAATAG	59.85	AGTGAATTATCATCCCAGCTGAA	59.979	83
Kenaf-230	CL1158.Contig2_All_940_3	AGC(3*5)	GCACATCGAAAATCGGATAATAG	59.85	TTTCTTCCTTTAAACACCCAACA	59.9	157
Kenaf-231	CL1158.Contig2_All_940_5	AGC(3*5)	ATCCTCCTCATCCCAGAAAGATA	60.284	AGTGAATTATCATCCCAGCTGAA	59.979	141
Kenaf-232	CL1163.Contig2_All_943_1	CTT(3*6)	TAAACAACCGGAGAAAACTCAAG	59.69	GGAAGAAGACTCACTCGCAGATA	60.033	136
Kenaf-233	CL1163.Contig2_All_943_4	CTT(3*6)	GATAAACAACCGGAGAAAACTCA	59.531	GGAAGAAGACTCACTCGCAGATA	60.033	138
Kenaf-234	CL1175.Contig1_All_948_3	TTC(3*7)	AACTCCTTTTCCGTCTCATGATT	60.354	TGAACTTATGATTGGTGCAGAGA	59.761	156
Kenaf-235	CL1175.Contig2_All_949_4	TTC(3*7)	CAAAACCATGCATACATTCAACA	60.644	GAAACTGAAGACAAACACGAACC	60.068	139
Kenaf-236	CL1175.Contig2_All_949_5	TTC(3*7)	CAAAACCATGCATACATTCAACA	60.644	GGAAACTGAAGACAAACACGAAC	60.068	140
Kenaf-237	CL1175.Contig4_All_950_2	GAA(3*7)	GAAACTGAAGACAAACACGAACC	60.068	CCCAATTTCTTCAAAACCCTAAC	60.095	139
Kenaf-238	CL1175.Contig4_All_950_3	GAA(3*7)	GGAAACTGAAGACAAACACGAAC	60.068	CCCAATTTCTTCAAAACCCTAAC	60.095	140
Kenaf-239	CL1175.Contig4_All_950_4	GAA(3*7)	GGAAACTGAAGACAAACACGAAC	60.068	CATCACAGATTCCCAATTTCTTC	59.828	151
Kenaf-240	CL1181.Contig3_All_952_1	CAG(3*5)	AGGAAACCGAACAGAAAGACCT	60.508	TTTTAATTATGGGATTGGGGAGT	59.816	135
Kenaf-241	CL1181.Contig3_All_952_2	CAG(3*5)	AGGAAACCGAACAGAAAGACCT	60.508	GTTTTAATTATGGGATTGGGGAG	59.816	136
Kenaf-242	CL1181.Contig3_All_952_3	CAG(3*5)	AGGAAACCGAACAGAAAGACCT	60.508	AATTATGGGATTGGGGAGTAAAG	59.496	131
Kenaf-243	CL1181.Contig3_All_952_4	CAG(3*5)	AGGAAACCGAACAGAAAGACCT	60.508	CTGTTTTAATTATGGGATTGGGG	60.61	138
Kenaf-244	CL1181.Contig3_All_952_5	CAG(3*5)	AGGAAACCGAACAGAAAGACCTC	62.149	TTTTAATTATGGGATTGGGGAGT	59.816	135
Kenaf-245	CL1181.Contig7_All_954_3	AAG(3*6)	TTTACCAACACAACCTCCAATTC	60.136	CTTTATCTGATGTGCTTCAGGCT	59.926	127
Kenaf-246	CL1181.Contig7_All_954_4	AAG(3*6)	TTTACCAACACAACCTCCAATTC	60.136	CTTCAGGCTTTGCTTTATTTCAA	59.911	113
Kenaf-247	CL1181.Contig7_All_955_1	GAA(3*5)	AGCCTGAAGCACATCAGATAAAG	59.926	ATTAGCATCGGGATTCAAAGAA	59.936	138
Kenaf-248	CL1181.Contig7_All_955_2	GAA(3*5)	AGCCTGAAGCACATCAGATAAAG	59.926	AATTAGCATCGGGATTCAAAGA	59.936	139
Kenaf-249	CL1181.Contig7_All_955_3	GAA(3*5)	AGCCTGAAGCACATCAGATAAAG	59.926	AACGTTCACGTTTCTTCCAAGT	60.075	109
Kenaf-250	CL1181.Contig7_All_955_4	GAA(3*5)	TTGAAATAAAGCAAAGCCTGAAG	59.911	ATTAGCATCGGGATTCAAAGAA	59.936	152
Kenaf-251	CL1181.Contig7_All_955_5	GAA(3*5)	TTGAAATAAAGCAAAGCCTGAAG	59.911	AATTAGCATCGGGATTCAAAGA	59.936	153
Kenaf-252	CL1183.Contig2_All_957_1	TTG(3*5)	CCACTGAAACTTTGATTCTTTCC	59.165	TGGCTATGATTTCTTAGGCTTGA	60.226	149
Kenaf-253	CL1183.Contig2_All_957_2	TTG(3*5)	CCACTGAAACTTTGATTCTTTCCT	60.037	TGGCTATGATTTCTTAGGCTTGA	60.226	149
Kenaf-254	CL1183.Contig2_All_957_3	TTG(3*5)	CCACTGAAACTTTGATTCTTTCC	59.165	GTGGCTATGATTTCTTAGGCTTG	59.323	150
Kenaf-255	CL1183.Contig2_All_957_4	TTG(3*5)	CCACTGAAACTTTGATTCTTTCCT	60.037	GTGGCTATGATTTCTTAGGCTTG	59.323	150
Kenaf-256	CL1183.Contig2_All_957_5	TTG(3*5)	CCACTGAAACTTTGATTCTTTCC	59.165	GGCTATGATTTCTTAGGCTTGAA	58.957	148
Kenaf-257	CL1205.Contig22_All_970_1	CTTT(4*5)	ATTCCCTCCTCCTTTCTTTTCTT	59.964	GTGCAATAAAGCTGATTTTCGAG	60.264	136
Kenaf-258	CL1205.Contig22_All_970_2	CTTT(4*5)	AATTCCCTCCTCCTTTCTTTTCT	59.964	GTGCAATAAAGCTGATTTTCGAG	60.264	137
Kenaf-259	CL1205.Contig22_All_970_3	CTTT(4*5)	ATTCCCTCCTCCTTTCTTTTCTT	59.964	AAAACCATGCCAGGTAATACAAA	59.672	101
Kenaf-260	CL1205.Contig22_All_970_4	CTTT(4*5)	AATTCCCTCCTCCTTTCTTTTCT	59.964	AAAACCATGCCAGGTAATACAAA	59.672	102
Kenaf-261	CL1205.Contig22_All_970_5	CTTT(4*5)	ATTCCCTCCTCCTTTCTTTTCTT	59.964	ACCATGCCAGGTAATACAAATCA	60.484	98
Kenaf-262	CL1205.Contig22_All_971_1	TA(2*10)	TTCTCGAAAATCAGCTTTATTGC	59.884	TCAAACCAATGAATACGACCCTA	60.582	123
Kenaf-263	CL1205.Contig22_All_971_2	TA(2*10)	TTCTCGAAAATCAGCTTTATTGC	59.884	GACAGACAGACATCATTGCACAC	60.636	147
Kenaf-264	CL1205.Contig22_All_971_3	TA(2*10)	TTCTCGAAAATCAGCTTTATTGC	59.884	AACAGACAGACAGACATCATTGC	59.275	151
Kenaf-265	CL1205.Contig22_All_971_4	TA(2*10)	CTCGAAAATCAGCTTTATTGCAC	60.264	TCAAACCAATGAATACGACCCTA	60.582	121
Kenaf-266	CL1205.Contig22_All_971_5	TA(2*10)	TTCTCGAAAATCAGCTTTATTGC	59.884	AGACAGACAGACATCATTGCACA	60.77	148
Kenaf-267	CL1205.Contig27_All_973_2	AAAGA(5*4)	TCTTTAATCTCTCCTGTTGCCTG	59.9	CTTTCTCACTTGGTTATCTGCGT	59.833	153
Kenaf-268	CL1205.Contig34_All_976_1	TA(2*10)	TCAAACCAATGAATACGACCCTA	60.582	TTCTCGAAAATCAGCTTTATTGC	59.884	123
Kenaf-269	CL1205.Contig34_All_976_2	TA(2*10)	GACAGACAGACATCATTGCACAC	60.636	TTCTCGAAAATCAGCTTTATTGC	59.884	147
Kenaf-270	CL1205.Contig34_All_976_3	TA(2*10)	AACAGACAGACAGACATCATTGC	59.275	TTCTCGAAAATCAGCTTTATTGC	59.884	151
Kenaf-271	CL1205.Contig34_All_976_4	TA(2*10)	TCAAACCAATGAATACGACCCTA	60.582	CTCGAAAATCAGCTTTATTGCAC	60.264	121
Kenaf-272	CL1205.Contig34_All_976_5	TA(2*10)	AGACAGACAGACATCATTGCACA	60.77	TTCTCGAAAATCAGCTTTATTGC	59.884	148
Kenaf-273	CL1205.Contig34_All_977_1	AAAG(4*5)	GTGCAATAAAGCTGATTTTCGAG	60.264	ATTCCCTCCTCCTTTCTTTTCTT	59.964	136
Kenaf-274	CL1205.Contig34_All_977_2	AAAG(4*5)	GTGCAATAAAGCTGATTTTCGAG	60.264	AATTCCCTCCTCCTTTCTTTTCT	59.964	137
Kenaf-275	CL1205.Contig34_All_977_3	AAAG(4*5)	AAAACCATGCCAGGTAATACAAA	59.672	ATTCCCTCCTCCTTTCTTTTCTT	59.964	101
Kenaf-276	CL1205.Contig34_All_977_4	AAAG(4*5)	AAAACCATGCCAGGTAATACAAA	59.672	AATTCCCTCCTCCTTTCTTTTCT	59.964	102
Kenaf-277	CL1205.Contig34_All_977_5	AAAG(4*5)	ACCATGCCAGGTAATACAAATCA	60.484	ATTCCCTCCTCCTTTCTTTTCTT	59.964	98
Kenaf-278	CL1223.Contig3_All_988_1	GGC(3*5)	AGATTTCGAGAGGAACGATGAC	59.719	TCATCTTCACTGTCACTATCCCA	59.607	117
Kenaf-279	CL1223.Contig3_All_988_2	GGC(3*5)	GAACGATGACGGTGGAGATAAT	60.215	TGGTTGTTGTCGTTCAACACTAT	59.457	135
Kenaf-280	CL1223.Contig3_All_988_3	GGC(3*5)	ACGGTGGAGATAATGGAATTGAA	61.737	ATCATTCCTCCTCTTTCCATAGC	59.951	160
Kenaf-281	CL1223.Contig3_All_988_4	GGC(3*5)	GATGACGGTGGAGATAATGGAAT	61.273	TGGTTGTTGTCGTTCAACACTAT	59.457	131
Kenaf-282	CL1223.Contig3_All_988_5	GGC(3*5)	GAGATTTCGAGAGGAACGATGAC	61.464	TCATCTTCACTGTCACTATCCCA	59.607	118
Kenaf-283	CL1245.Contig1_All_994_1	GGC(3*5)	AAAGCAAGTGATCGAACAACAC	59.29	GTCTACGTGGGAAAATCCAAGAG	61.205	157
Kenaf-284	CL1245.Contig1_All_994_2	GGC(3*5)	AAAGCAAGTGATCGAACAACAC	59.29	AGTCTACGTGGGAAAATCCAAGA	61.205	158
Kenaf-285	CL1245.Contig1_All_994_3	GGC(3*5)	AAAGCAAGTGATCGAACAACAC	59.29	GTCTACGTGGGAAAATCCAAGA	60.352	157
Kenaf-286	CL1245.Contig1_All_994_4	GGC(3*5)	CAAAGCAAGTGATCGAACAACAC	61.963	GTCTACGTGGGAAAATCCAAGAG	61.205	158
Kenaf-287	CL1245.Contig1_All_994_5	GGC(3*5)	CAAAGCAAGTGATCGAACAACAC	61.963	AGTCTACGTGGGAAAATCCAAGA	61.205	159
Kenaf-288	CL1245.Contig1_All_995_1	GAT(3*5)	TCTTGGATTTTCCCACGTAGACT	61.205	AAACTCATTCAACCAAAAGCAAA	60.03	131
Kenaf-289	CL1245.Contig1_All_995_2	GAT(3*5)	CTCTTGGATTTTCCCACGTAGAC	61.205	AAACTCATTCAACCAAAAGCAAA	60.03	132
Kenaf-290	CL1245.Contig1_All_995_3	GAT(3*5)	TCTTGGATTTTCCCACGTAGAC	60.352	AAACTCATTCAACCAAAAGCAAA	60.03	131
Kenaf-291	CL1245.Contig1_All_995_4	GAT(3*5)	CTCTTGGATTTTCCCACGTAGA	60.474	AAACTCATTCAACCAAAAGCAAA	60.03	132
Kenaf-292	CL1245.Contig1_All_995_5	GAT(3*5)	CTTGGATTTTCCCACGTAGACT	59.521	AAACTCATTCAACCAAAAGCAAA	60.03	130
Kenaf-293	CL1286.Contig2_All_1008_1	GA(2*9)	GTAAAAGAAATTACCGTTCGCCT	59.924	AGACCCAAGAAGACAAAGATTCC	59.995	160
Kenaf-294	CL1286.Contig2_All_1008_2	GA(2*9)	GTAAAAGAAATTACCGTTCGCCT	59.924	GAAGACAAAGATTCCGTGAAGAA	59.755	152
Kenaf-295	CL1286.Contig2_All_1008_3	GA(2*9)	AGGTAAAAGAAATTACCGTTCGC	59.924	GAAGACAAAGATTCCGTGAAGAA	59.755	154
Kenaf-296	CL1286.Contig2_All_1008_4	GA(2*9)	GTAAAAGAAATTACCGTTCGCCT	59.924	AGAAGACAAAGATTCCGTGAAGA	59.402	153
Kenaf-297	CL1286.Contig2_All_1008_5	GA(2*9)	AGGTAAAAGAAATTACCGTTCGC	59.924	AGAAGACAAAGATTCCGTGAAGA	59.402	155
Kenaf-298	CL1289.Contig11_All_1016_1	TGC(3*6)	ACTACATGAGGATACCTTCAGCG	59.688	CCTATGATCAATCTGGTGGTTGT	60.123	160
Kenaf-299	CL1289.Contig11_All_1016_2	TGC(3*6)	GACTCAAAAGGATACCTTCAGCA	59.776	CGTAGCATATGGAAAAACCGTAT	59.347	145
Kenaf-300	CL1289.Contig11_All_1016_3	TGC(3*6)	GACTCAAAAGGATACCTTCAGCA	59.776	AGCATATGGAAAAACCGTATCAC	59.306	142
Kenaf-301	CL1289.Contig11_All_1016_4	TGC(3*6)	ACTACATGAGGATACCTTCAGCG	59.688	CTATGATCAATCTGGTGGTTGTG	59.369	159
Kenaf-302	CL1289.Contig11_All_1016_5	TGC(3*6)	ACTACATGAGGATACCTTCAGCG	59.688	CGTAGCATATGGAAAAACCGTAT	59.347	114
Kenaf-303	CL1290.Contig2_All_1018_1	AG(2*7)	TCAAAACAAAATATTGAAGGGGA	59.715	TCATTCTCAAAAGAAATGCACAA	59.75	97
Kenaf-304	CL1290.Contig2_All_1018_2	AG(2*7)	CAGGGATATGCTTTATGACTGGA	60.338	ATTTGATCCCGATTTAGCTTGTT	60.208	151
Kenaf-305	CL1290.Contig2_All_1018_3	AG(2*7)	TCAAAACAAAATATTGAAGGGGA	59.715	AGTTGTTCAATGTGGTAGATGCC	60.296	130
Kenaf-306	CL1290.Contig2_All_1018_4	AG(2*7)	TCAAAACAAAATATTGAAGGGGA	59.715	CGAAGAGAGTTGTTCAATGTGGT	60.574	137
Kenaf-307	CL1290.Contig2_All_1018_5	AG(2*7)	CAAAACAAAATATTGAAGGGGAA	59.281	TCATTCTCAAAAGAAATGCACAA	59.75	96
Kenaf-308	CL1290.Contig5_All_1019_1	TC(2*7)	TCATTCTCAAAAGAAATGCACAA	59.75	TCAAAACAAAATATTGAAGGGGA	59.715	97
Kenaf-309	CL1290.Contig5_All_1019_2	TC(2*7)	ATTTGATCCCGATTTAGCTTGTT	60.208	CAGGGATATGCTTTATGACTGGA	60.338	151
Kenaf-310	CL1290.Contig5_All_1019_3	TC(2*7)	AGTTGTTCAATGTGGTAGATGCC	60.296	TCAAAACAAAATATTGAAGGGGA	59.715	130
Kenaf-311	CL1290.Contig5_All_1019_4	TC(2*7)	CGAAGAGAGTTGTTCAATGTGGT	60.574	TCAAAACAAAATATTGAAGGGGA	59.715	137
Kenaf-312	CL1290.Contig5_All_1019_5	TC(2*7)	TCATTCTCAAAAGAAATGCACAA	59.75	CAAAACAAAATATTGAAGGGGAA	59.281	96
Kenaf-313	CL12.Contig3_All_8_1	TTA(3*5)	TGTGATTGAACCTTGAAACTGTG	60.06	CTCTCTACCAACTCAAAGCCAAA	59.935	140
Kenaf-314	CL12.Contig3_All_8_2	TTA(3*5)	TGTGATTGAACCTTGAAACTGTG	60.06	CTATTTGCTTGCCTCTCTACCAA	59.926	152
Kenaf-315	CL12.Contig3_All_8_3	TTA(3*5)	AGTGTTGACACGCCTCTATTTGT	60.109	CTCTCTACCAACTCAAAGCCAAA	59.935	160
Kenaf-316	CL12.Contig3_All_8_4	TTA(3*5)	TGTGATTGAACCTTGAAACTGTG	60.06	TATTTGCTTGCCTCTCTACCAAC	59.806	151
Kenaf-317	CL12.Contig3_All_8_5	TTA(3*5)	TGTGATTGAACCTTGAAACTGTG	60.06	TCTATTTGCTTGCCTCTCTACCA	60.389	153
Kenaf-318	CL1304.Contig3_All_1024_1	AG(2*7)	AATGGTAGACAAATGCAGAAGGA	60.014	TCATAAATAAAGCGGCAAAAAGA	60.101	113
Kenaf-319	CL1304.Contig3_All_1024_2	AG(2*7)	AATGGTAGACAAATGCAGAAGGA	60.014	CACGTAGCTCATAAATAAAGCGG	60.171	121
Kenaf-320	CL1304.Contig3_All_1024_3	AG(2*7)	AATGGTAGACAAATGCAGAAGGA	60.014	GTAGCTCATAAATAAAGCGGCAA	59.809	118
Kenaf-321	CL1304.Contig3_All_1024_4	AG(2*7)	AATGGTAGACAAATGCAGAAGGA	60.014	TAGCTCATAAATAAAGCGGCAAA	60.236	117
Kenaf-322	CL1304.Contig3_All_1024_5	AG(2*7)	TGGTAGACAAATGCAGAAGGAGT	60.178	TCATAAATAAAGCGGCAAAAAGA	60.101	111
Kenaf-323	CL1314.Contig3_All_1025_1	CGC(3*5)	TGAATGATTTCATGTACGTTGGA	60.237	CGTTGGGTTCAATAAAGTAGTCG	59.94	146
Kenaf-324	CL1314.Contig3_All_1025_2	CGC(3*5)	TGAATGATTTCATGTACGTTGGA	60.237	TAGCCGTTGGGTTCAATAAAGTA	59.911	150
Kenaf-325	CL1314.Contig3_All_1025_3	CGC(3*5)	CGTGAATGATTTCATGTACGTTG	60.291	CGTTGGGTTCAATAAAGTAGTCG	59.94	148
Kenaf-326	CL1314.Contig3_All_1025_4	CGC(3*5)	AGGTGCACAGTATAGAATGGTGG	60.309	CGTTGGGTTCAATAAAGTAGTCG	59.94	95
Kenaf-327	CL1314.Contig3_All_1025_5	CGC(3*5)	CGTGAATGATTTCATGTACGTTG	60.291	TAGCCGTTGGGTTCAATAAAGTA	59.911	152
Kenaf-328	CL1316.Contig14_All_1036_2	GA(2*7)	TAGAGAGGATAGGCACCACAGAG	59.914	TCTTTCTTTATCGCGCTCATAGT	59.574	148
Kenaf-329	CL1316.Contig14_All_1036_3	GA(2*7)	TAGAGAGGATAGGCACCACAGAG	59.914	CTCACGATCTCTTTCTTTATCGC	59.536	157
Kenaf-330	CL1316.Contig14_All_1036_4	GA(2*7)	TAGAGAGGATAGGCACCACAGAG	59.914	ATCTCTTTCTTTATCGCGCTCAT	60.697	151
Kenaf-331	CL1316.Contig2_All_1027_4	GA(2*7)	TAGACACCACAGAGATCGTGAAA	59.788	TCTTTCTTTATCGCGCTCATAGT	59.574	139
Kenaf-332	CL1316.Contig9_All_1032_2	TC(2*7)	TCTTTCTTTATCGCGCTCATAGT	59.574	TAGAGAGGATAGGCACCACAGAG	59.914	148
Kenaf-333	CL1316.Contig9_All_1032_3	TC(2*7)	CTCACGATCTCTTTCTTTATCGC	59.536	TAGAGAGGATAGGCACCACAGAG	59.914	157
Kenaf-334	CL1316.Contig9_All_1032_4	TC(2*7)	ATCTCTTTCTTTATCGCGCTCAT	60.697	TAGAGAGGATAGGCACCACAGAG	59.914	151
Kenaf-335	CL1324.Contig3_All_1038_1	AAG(3*5)	CAAGAAAGAGGAGGAAGGAAATG	60.567	TCGGTTTCTGCTTGTTGATTAGT	60.176	119
Kenaf-336	CL1324.Contig3_All_1038_2	AAG(3*5)	GAAGACAACCGAGAAAGAGATCA	59.878	TTTCTGCTTGTTGATTAGTTGCC	60.638	160
Kenaf-337	CL1324.Contig3_All_1038_3	AAG(3*5)	CAAGAAAGAGGAGGAAGGAAATG	60.567	CGGTTTCTGCTTGTTGATTAGTT	59.716	118
Kenaf-338	CL1324.Contig3_All_1038_4	AAG(3*5)	CAAGAAAGAGGAGGAAGGAAATG	60.567	ATCGGTTTCTGCTTGTTGATTAG	59.68	120
Kenaf-339	CL1324.Contig3_All_1038_5	AAG(3*5)	CAAGAAAGAGGAGGAAGGAAATG	60.567	GATCGGTTTCTGCTTGTTGATTA	60.484	121
Kenaf-340	CL1326.Contig8_All_1048_1	AT(2*7)	TGCACATATCTTGAATAACAAGGAA	59.917	ATCCAAGATGTTTCACAGCAGTT	60.054	154
Kenaf-341	CL1326.Contig8_All_1048_2	AT(2*7)	TGCACATATCTTGAATAACAAGGAA	59.917	TGATGGAGCTGTTCTAAAAGGAC	59.776	132
Kenaf-342	CL1326.Contig8_All_1048_3	AT(2*7)	TGCACATATCTTGAATAACAAGGAA	59.917	TTGATGGAGCTGTTCTAAAAGGA	60.243	133
Kenaf-343	CL1326.Contig8_All_1048_4	AT(2*7)	TGCACATATCTTGAATAACAAGGAA	59.917	TACGTTTCGGATTTATCGTTCAC	60.245	96
Kenaf-344	CL1326.Contig8_All_1048_5	AT(2*7)	TGCACATATCTTGAATAACAAGGA	58.699	ATCCAAGATGTTTCACAGCAGTT	60.054	154
Kenaf-345	CL1327.Contig1_All_1049_1	TA(2*8)	AGTGTTTGTTGCTCAATGCTTCT	60.349	CAGTCACAACCTGAGACACCATA	60.081	143
Kenaf-346	CL1327.Contig1_All_1049_2	TA(2*8)	AGTGTTTGTTGCTCAATGCTTCT	60.349	TCTACCAGTCACAACCTGAGACA	59.818	148
Kenaf-347	CL1327.Contig1_All_1049_3	TA(2*8)	AATCAGTGGAACACTCGAAACTG	60.574	CAGTCACAACCTGAGACACCATA	60.081	109
Kenaf-348	CL1327.Contig1_All_1049_4	TA(2*8)	AGTGGAACACTCGAAACTGAACT	59.352	CAGTCACAACCTGAGACACCATA	60.081	105
Kenaf-349	CL1327.Contig1_All_1049_5	TA(2*8)	TCCTCTAATCAGTGGAACACTCG	60.666	CAGTCACAACCTGAGACACCATA	60.081	115
Kenaf-350	CL132.Contig2_All_153_1	CAGAC(5*4)	AATTCAAGGGTTCAAAGGAACAT	60.102	TTGTTTGGTATGATAGGACCCTG	60.116	108
Kenaf-351	CL132.Contig2_All_153_2	CAGAC(5*4)	AATTCAAGGGTTCAAAGGAACAT	60.102	TTTATTTGGGTCTGGTTTGTTTG	60.128	124
Kenaf-352	CL132.Contig2_All_153_3	CAGAC(5*4)	CAAGGGTTCAAAGGAACATGTAA	60.255	CATGAATGATTGGTTTGGAGAAT	60.068	160
Kenaf-353	CL132.Contig2_All_153_4	CAGAC(5*4)	CAAGGGTTCAAAGGAACATGTAA	60.255	AATGATTGGTTTGGAGAATCCTT	60.069	156
Kenaf-354	CL132.Contig2_All_153_5	CAGAC(5*4)	CAAGGGTTCAAAGGAACATGTAA	60.255	TTGTTTGGTATGATAGGACCCTG	60.116	104
Kenaf-355	CL132.Contig3_All_154_1	GGTCT(5*4)	TTGTTTGGTATGATAGGACCCTG	60.116	AATTCAAGGGTTCAAAGGAACAT	60.102	108
Kenaf-356	CL132.Contig3_All_154_2	GGTCT(5*4)	TTTATTTGGGTCTGGTTTGTTTG	60.128	AATTCAAGGGTTCAAAGGAACAT	60.102	124
Kenaf-357	CL132.Contig3_All_154_3	GGTCT(5*4)	CATGAATGATTGGTTTGGAGAAT	60.068	CAAGGGTTCAAAGGAACATGTAA	60.255	160
Kenaf-358	CL132.Contig3_All_154_4	GGTCT(5*4)	AATGATTGGTTTGGAGAATCCTT	60.069	CAAGGGTTCAAAGGAACATGTAA	60.255	156
Kenaf-359	CL132.Contig3_All_154_5	GGTCT(5*4)	TTGTTTGGTATGATAGGACCCTG	60.116	CAAGGGTTCAAAGGAACATGTAA	60.255	104
Kenaf-360	CL1335.Contig1_All_1050_1	CCG(3*6)	ACAACAGCGGGGGTAATACAT	60.497	GGTTGAATCTGAAGCATACTTGG	60.014	155
Kenaf-361	CL1335.Contig1_All_1050_2	CCG(3*6)	ACAACAGCGGGGGTAATACAT	60.497	GTTGAATCTGAAGCATACTTGGC	60.15	154
Kenaf-362	CL1335.Contig1_All_1050_3	CCG(3*6)	AACAACAGCGGGGGTAATACAT	61.668	GGTTGAATCTGAAGCATACTTGG	60.014	156
Kenaf-363	CL1335.Contig1_All_1050_4	CCG(3*6)	AACAACAGCGGGGGTAATACAT	61.668	GTTGAATCTGAAGCATACTTGGC	60.15	155
Kenaf-364	CL1335.Contig1_All_1050_5	CCG(3*6)	ACAACAGCGGGGGTAATACATC	62.173	GGTTGAATCTGAAGCATACTTGG	60.014	155
Kenaf-365	CL1338.Contig2_All_1051_1	CTT(3*5)	TTGTCTTGTTTGTTCATCAATGG	59.89	GAAAGAAGAGAAGAAGGGGAATG	59.729	159
Kenaf-366	CL1338.Contig2_All_1051_2	CTT(3*5)	CTTCACAACTCTATGGATCCCAC	59.878	GAAAGAAGAGAAGAAGGGGAATG	59.729	98
Kenaf-367	CL1338.Contig2_All_1051_3	CTT(3*5)	TCCACCTTCACAACTCTATGGAT	59.878	GAAAGAAGAGAAGAAGGGGAATG	59.729	103
Kenaf-368	CL1338.Contig2_All_1051_4	CTT(3*5)	TTGTCTTGTTTGTTCATCAATGG	59.89	GGAAAGAAGAGAAGAAGGGGAAT	60.407	160
Kenaf-369	CL1338.Contig2_All_1051_5	CTT(3*5)	CTTCACAACTCTATGGATCCCAC	59.878	GGAAAGAAGAGAAGAAGGGGAAT	60.407	99
Kenaf-370	CL1340.Contig1_All_1052_1	CCA(3*5)	TCTATGTTTCAATCTTCTGGGGA	59.952	TGGGAGTTACAGTTGAATCCAGT	59.914	151
Kenaf-371	CL1340.Contig1_All_1052_2	CCA(3*5)	GTTTCAATCTTCTGGGGAAAGTT	59.874	TGGGAGTTACAGTTGAATCCAGT	59.914	146
Kenaf-372	CL1340.Contig1_All_1052_3	CCA(3*5)	CTACAGCCAAATTCGTCTTTCAC	60.176	GAACCAAATAAATTCCTTGGAGG	60.064	137
Kenaf-373	CL1340.Contig1_All_1052_4	CCA(3*5)	CTACAGCCAAATTCGTCTTTCAC	60.176	GGAACCAAATAAATTCCTTGGAG	60.064	138
Kenaf-374	CL1340.Contig1_All_1052_5	CCA(3*5)	CTACAGCCAAATTCGTCTTTCAC	60.176	AGGGATAATCTGGGAACCAAATA	59.93	150
Kenaf-375	CL1343.Contig4_All_1053_1	ACAAG(5*4)	TTTATGAGTCTTCATCACCAGCA	59.761	CAAGTGTTTTCGCTGTCTTTGAT	60.685	156
Kenaf-376	CL1343.Contig4_All_1053_2	ACAAG(5*4)	TAAATTCCTGGGTTTCTGTCCTT	60.217	TAAACATGAGTTGAAATTGCCTG	59.175	146
Kenaf-377	CL1343.Contig4_All_1053_3	ACAAG(5*4)	TTTATGAGTCTTCATCACCAGCA	59.761	TAAACATGAGTTGAAATTGCCTG	59.175	108
Kenaf-378	CL1344.Contig4_All_1057_4	ACC(3*6)	TGTGGATGGTAATGATGAAAACA	60.103	TCCGTGAGCTCCTTACTTTTACA	60.295	135
Kenaf-379	CL1344.Contig4_All_1057_5	ACC(3*6)	TGTGGATGGTAATGATGAAAACA	60.103	TTTTACAGTTTTGCTCCATGTCA	59.677	119
Kenaf-380	CL1344.Contig9_All_1064_1	ACC(3*6)	TGTGGATGGTAATGATGAAAACA	60.103	TCAGAAACATTCTAGGTTCTCGC	59.906	159
Kenaf-381	CL1344.Contig9_All_1064_2	ACC(3*6)	TGTGGATGGTAATGATGAAAACA	60.103	AAACATTCTAGGTTCTCGCTTCC	60.14	155
Kenaf-382	CL1344.Contig9_All_1064_3	ACC(3*6)	TGTGGATGGTAATGATGAAAACA	60.103	ACTTTCACAGTTCTGCTCCATGT	60.224	121
Kenaf-383	CL1344.Contig9_All_1064_4	ACC(3*6)	TGATGAAAACACCACTACCATCA	60.277	TCAGAAACATTCTAGGTTCTCGC	59.906	147
Kenaf-384	CL1344.Contig9_All_1064_5	ACC(3*6)	TGATGAAAACACCACTACCATCA	60.277	AAACATTCTAGGTTCTCGCTTCC	60.14	143
Kenaf-385	CL1359.Contig1_All_1067_1	TGC(3*7)	AGAACAGCAACCATGAAAGATCA	61.029	AAGACCCCAACATGTACTATGGA	59.645	132
Kenaf-386	CL1359.Contig1_All_1067_2	TGC(3*7)	GAACAGCAACCATGAAAGATCA	60.118	AAGACCCCAACATGTACTATGGA	59.645	131
Kenaf-387	CL1359.Contig1_All_1067_3	TGC(3*7)	AGAACAGCAACCATGAAAGATCA	61.029	TCCTGGCTATGGAAATTATCAAC	59.369	104
Kenaf-388	CL1359.Contig1_All_1067_4	TGC(3*7)	GAACAGCAACCATGAAAGATCA	60.118	TCCTGGCTATGGAAATTATCAAC	59.369	103
Kenaf-389	CL1359.Contig1_All_1067_5	TGC(3*7)	CCACAGAGAAACAAGGACATATCA	60.405	TCCTGGCTATGGAAATTATCAAC	59.369	159
Kenaf-390	CL1359.Contig2_All_1068_1	CAG(3*7)	AAGACCCCAACATGTACTATGGA	59.645	AGAACAGCAACCATGAAAGATCA	61.029	132
Kenaf-391	CL1359.Contig2_All_1068_2	CAG(3*7)	AAGACCCCAACATGTACTATGGA	59.645	GAACAGCAACCATGAAAGATCA	60.118	131
Kenaf-392	CL1359.Contig2_All_1068_3	CAG(3*7)	TCCTGGCTATGGAAATTATCAAC	59.369	AGAACAGCAACCATGAAAGATCA	61.029	104
Kenaf-393	CL1359.Contig2_All_1068_4	CAG(3*7)	TCCTGGCTATGGAAATTATCAAC	59.369	GAACAGCAACCATGAAAGATCA	60.118	103
Kenaf-394	CL1359.Contig2_All_1068_5	CAG(3*7)	TCCTGGCTATGGAAATTATCAAC	59.369	CCACAGAGAAACAAGGACATATCA	60.405	159
Kenaf-395	CL1360.Contig2_All_1069_1	TGT(3*5)	ACATTGTCTTTTCCCATTTGGAT	60.793	CATGAAAACATCATCTGCAACAG	60.549	113
Kenaf-396	CL1360.Contig2_All_1069_2	TGT(3*5)	CATTGTCTTTTCCCATTTGGAT	60.055	CATGAAAACATCATCTGCAACAG	60.549	112
Kenaf-397	CL1360.Contig2_All_1069_3	TGT(3*5)	AGCACATTGTCTTTTCCCATTT	59.877	CATGAAAACATCATCTGCAACAG	60.549	116
Kenaf-398	CL1360.Contig2_All_1069_4	TGT(3*5)	ATTGTCTTTTCCCATTTGGATTG	61.232	CATGAAAACATCATCTGCAACAG	60.549	111
Kenaf-399	CL1360.Contig2_All_1069_5	TGT(3*5)	CATTGTCTTTTCCCATTTGGATT	61.232	CATGAAAACATCATCTGCAACAG	60.549	112
Kenaf-400	CL137.Contig4_All_157_1	T(1*13)	GGTGTTTTCAAGACTCCTCCTTT	60.029	TCTCAGCACACCATTCTTTACAA	59.799	96
Kenaf-401	CL137.Contig4_All_157_2	T(1*13)	GGTGTTTTCAAGACTCCTCCTTT	60.029	ACTAGCTCTTCATCTGTGGGATG	59.787	140
Kenaf-402	CL137.Contig4_All_157_3	T(1*13)	GGTGTTTTCAAGACTCCTCCTTT	60.029	CACTAGCTCTTCATCTGTGGGAT	59.787	141
Kenaf-403	CL137.Contig4_All_158_1	TTG(3*5)	GGTGTTTTCAAGACTCCTCCTTT	60.029	TCTCAGCACACCATTCTTTACAA	59.799	96
Kenaf-404	CL137.Contig4_All_158_2	TTG(3*5)	GGTGTTTTCAAGACTCCTCCTTT	60.029	ACTAGCTCTTCATCTGTGGGATG	59.787	140
Kenaf-405	CL137.Contig4_All_158_3	TTG(3*5)	GGTGTTTTCAAGACTCCTCCTTT	60.029	CACTAGCTCTTCATCTGTGGGAT	59.787	141
Kenaf-406	CL137.Contig4_All_158_5	TTG(3*5)	TTTATAACAGGCTCAATTGGGTG	60.238	TCTCAGCACACCATTCTTTACAA	59.799	115
Kenaf-407	CL1382.Contig26_All_1084_1	TTC(3*5)	CTCTTTAAACACCTTCCCAAACC	60.248	ATGAAGGGGAAAGAAAAGAAAGA	59.617	141
Kenaf-408	CL1382.Contig26_All_1084_2	TTC(3*5)	CTCTTTAAACACCTTCCCAAACC	60.248	GATGAAGGGGAAAGAAAAGAAAG	59.617	142
Kenaf-409	CL1382.Contig26_All_1084_3	TTC(3*5)	CAAACCAACAAACCCCTTTTTAT	60.342	ATGAAGGGGAAAGAAAAGAAAGA	59.617	124
Kenaf-410	CL1382.Contig26_All_1084_4	TTC(3*5)	CTCTTTAAACACCTTCCCAAACC	60.248	TGAAGGGGAAAGAAAAGAAAGAA	60.535	140
Kenaf-411	CL1382.Contig26_All_1084_5	TTC(3*5)	CAAACCAACAAACCCCTTTTTAT	60.342	TGAAGGGGAAAGAAAAGAAAGAA	60.535	123
Kenaf-412	CL1384.Contig3_All_1091_1	GAA(3*6)	AACTCTACTGGGAACTTTGGAGC	60.175	ATCCATTCTTGGGGTTTTAGAGA	60.186	109
Kenaf-413	CL1384.Contig3_All_1091_2	GAA(3*6)	GAGCAAGAACATGCCAACTCTAC	60.317	ATCCATTCTTGGGGTTTTAGAGA	60.186	124
Kenaf-414	CL1384.Contig3_All_1091_3	GAA(3*6)	GTAGAGCAAGAACATGCCAACTC	60.317	ATCCATTCTTGGGGTTTTAGAGA	60.186	127
Kenaf-415	CL1384.Contig3_All_1091_4	GAA(3*6)	ATGCCAACTCTACTGGGAACTTT	60.404	ATCCATTCTTGGGGTTTTAGAGA	60.186	114
Kenaf-416	CL1384.Contig3_All_1091_5	GAA(3*6)	TAGAGCAAGAACATGCCAACTCT	60.438	ATCCATTCTTGGGGTTTTAGAGA	60.186	126
Kenaf-417	CL1387.Contig4_All_1095_1	CTTCTA(6*4)	TGAATCTGAATCCCTCGAGTCTA	60.214	TCTGGAACATAAGAGTTGAATGAGA	59.317	101
Kenaf-418	CL1387.Contig4_All_1095_2	CTTCTA(6*4)	TAGATTTGAATCTGAATCCCTCG	59.58	TCTGGAACATAAGAGTTGAATGAGA	59.317	107
Kenaf-419	CL1387.Contig4_All_1095_3	CTTCTA(6*4)	TGAATCTGAATCCCTCGAGTCTA	60.214	TCTGGAACATAAGAGTTGAATGAGAG	60.178	101
Kenaf-420	CL1387.Contig4_All_1095_4	CTTCTA(6*4)	TAGATTTGAATCTGAATCCCTCG	59.58	TCTGGAACATAAGAGTTGAATGAGAG	60.178	107
Kenaf-421	CL1387.Contig4_All_1095_5	CTTCTA(6*4)	TGAATCTGAATCCCTCGAGTCTA	60.214	ATCTGGAACATAAGAGTTGAATGAGA	59.588	102
Kenaf-422	CL1387.Contig5_All_1096_1	CTTCTA(6*4)	TGAATCTGAATCCCTCGAGTCTA	60.214	TGCCATTCTGGGTTTTTAATGTA	60.567	139
Kenaf-423	CL1387.Contig5_All_1096_2	CTTCTA(6*4)	TAGATTTGAATCTGAATCCCTCG	59.58	TGCCATTCTGGGTTTTTAATGTA	60.567	145
Kenaf-424	CL1404.Contig2_All_1097_1	GCA(3*5)	CCTCCTCATCGTCATTTAACTTG	60.008	ATTGTGGTACAGAGCTTGTTGCT	60.24	156
Kenaf-425	CL1404.Contig2_All_1097_2	GCA(3*5)	TCGATCTCTACAGCAACCCTAAC	59.797	ATTGTGGTACAGAGCTTGTTGCT	60.24	131
Kenaf-426	CL1404.Contig2_All_1097_3	GCA(3*5)	TTCGATCTCTACAGCAACCCTAA	60.263	ATTGTGGTACAGAGCTTGTTGCT	60.24	132
Kenaf-427	CL1404.Contig2_All_1097_4	GCA(3*5)	GATCTCTACAGCAACCCTAACCC	60.373	ATTGTGGTACAGAGCTTGTTGCT	60.24	129
Kenaf-428	CL1404.Contig2_All_1097_5	GCA(3*5)	CCCTCCTCATCGTCATTTAACTT	60.698	ATTGTGGTACAGAGCTTGTTGCT	60.24	157
Kenaf-429	CL140.Contig2_All_160_1	CAC(3*5)	CTCCTCTACCCGAGGGTTCT	59.694	TGGTTGAGTTGGAAGAGGTAGAG	59.797	149
Kenaf-430	CL140.Contig2_All_160_2	CAC(3*5)	CTCCTCTACCCGAGGGTTCT	59.694	GTGGTTGAGTTGGAAGAGGTAGA	59.668	150
Kenaf-431	CL140.Contig2_All_160_3	CAC(3*5)	CTCCTCTACCCGAGGGTTCTC	61.486	TGGTTGAGTTGGAAGAGGTAGAG	59.797	149
Kenaf-432	CL140.Contig2_All_160_4	CAC(3*5)	TCCTCTACCCGAGGGTTCTC	60.586	TGGTTGAGTTGGAAGAGGTAGAG	59.797	148
Kenaf-433	CL140.Contig2_All_160_5	CAC(3*5)	CTCCTCTACCCGAGGGTTCTC	61.486	GTGGTTGAGTTGGAAGAGGTAGA	59.668	150
Kenaf-434	CL1424.Contig11_All_1100_1	GA(2*6)	GGACGACAAGCTGTTATTGACTT	59.709	AGTGACTGAATGCGGTTTCTATG	60.547	122
Kenaf-435	CL1424.Contig11_All_1100_2	GA(2*6)	GGACGACAAGCTGTTATTGACTT	59.709	CGGTTTCTATGAGCAAAATCAGA	60.601	110
Kenaf-436	CL1424.Contig11_All_1100_4	GA(2*6)	ACGACAAGCTGTTATTGACTTGC	60.713	AGTGACTGAATGCGGTTTCTATG	60.547	120
Kenaf-437	CL1424.Contig8_All_1099_1	TC(2*6)	AGTGACTGAATGCGGTTTCTATG	60.547	GGACGACAAGCTGTTATTGACTT	59.709	122
Kenaf-438	CL1424.Contig8_All_1099_2	TC(2*6)	CGGTTTCTATGAGCAAAATCAGA	60.601	GGACGACAAGCTGTTATTGACTT	59.709	110
Kenaf-439	CL1424.Contig8_All_1099_4	TC(2*6)	CTTCAACAGGTCTTTCATTTCGT	59.682	CGACAAGCTGTTATTGACTTGCT	60.83	160
Kenaf-440	CL1424.Contig8_All_1099_5	TC(2*6)	AGTGACTGAATGCGGTTTCTATG	60.547	ACGACAAGCTGTTATTGACTTGC	60.713	120
Kenaf-441	CL1433.Contig1_All_1101_1	CAA(3*5)	GGTGCAACTTTCAGGTAGACAAA	60.558	AGCGAAGCAATGTAGTTATGTCC	59.706	93
Kenaf-442	CL1433.Contig1_All_1101_2	CAA(3*5)	GGTGCAACTTTCAGGTAGACAAA	60.558	TTCTTCATCAAGACCCATACAGC	60.497	113
Kenaf-443	CL1433.Contig1_All_1101_3	CAA(3*5)	GGTGCAACTTTCAGGTAGACAAA	60.558	CCATACAGCGAAGCAATGTAGTT	60.552	99
Kenaf-444	CL1433.Contig1_All_1101_4	CAA(3*5)	TGCAACTTTCAGGTAGACAAAAA	58.975	AGCGAAGCAATGTAGTTATGTCC	59.706	91
Kenaf-445	CL1433.Contig1_All_1101_5	CAA(3*5)	GGTGCAACTTTCAGGTAGACAAA	60.558	TCTTTTTCTTCATCAAGACCCAT	59.123	118
Kenaf-446	CL1439.Contig4_All_1104_1	ACC(3*5)	ATGACCAAACTGATGGCAGTTAC	60.296	TATGGCTAGGCATTGTCCTAAAG	59.672	133
Kenaf-447	CL1439.Contig4_All_1104_2	ACC(3*5)	ATGACCAAACTGATGGCAGTTAC	60.296	CCTAAAGCCAACATGATAGGAGA	59.638	117
Kenaf-448	CL1439.Contig4_All_1104_3	ACC(3*5)	ATGACCAAACTGATGGCAGTTAC	60.296	TCCTAAAGCCAACATGATAGGAG	59.638	118
Kenaf-449	CL1439.Contig4_All_1104_4	ACC(3*5)	ATGACCAAACTGATGGCAGTTAC	60.296	GTCCTAAAGCCAACATGATAGGA	59.515	119
Kenaf-450	CL1439.Contig4_All_1104_5	ACC(3*5)	ATGACCAAACTGATGGCAGTTAC	60.296	AACATGATAGGAGATCGAAGTGG	59.496	108
Kenaf-451	CL1440.Contig2_All_1105_1	GAG(3*5)	AGCAACTGTACCTCCTACACCAA	60.102	CCACCATCCATATCAAGACTATCA	60.095	141
Kenaf-452	CL1440.Contig2_All_1105_2	GAG(3*5)	CATTCACAGTTGGAGGTGAAGTC	60.956	CTCCAACATCTCCTTCTAGGCTT	60.261	153
Kenaf-453	CL1440.Contig2_All_1105_3	GAG(3*5)	AGCAACTGTACCTCCTACACCAA	60.102	CACCACCATCCATATCAAGACTA	58.847	143
Kenaf-454	CL1440.Contig2_All_1105_4	GAG(3*5)	AGTTGGAGGTGAAGTCGAAACTC	61.043	TCTCCTTCTAGGCTTACTCCACC	60.261	138
Kenaf-455	CL1440.Contig2_All_1105_5	GAG(3*5)	AGTTGGAGGTGAAGTCGAAACTC	61.043	CTCCAACATCTCCTTCTAGGCTT	60.261	146
Kenaf-456	CL1445.Contig4_All_1106_1	ACC(3*6)	CCGTATGGTACTTATGGTGGTGT	59.941	AAGGTACCATTGGACTAACCATGT	59.94	88
Kenaf-457	CL1445.Contig4_All_1106_2	ACC(3*6)	CCGTATGGTACTTATGGTGGTGT	59.941	ACCATTGGACTAACCATGTAGGG	61.205	83
Kenaf-458	CL1445.Contig4_All_1106_3	ACC(3*6)	CCGTATGGTACTTATGGTGGTGT	59.941	AGGTACCATTGGACTAACCATGT	58.707	87
Kenaf-459	CL1445.Contig4_All_1106_4	ACC(3*6)	CCGTATGGTACTTATGGTGGTGT	59.941	CCATTGGACTAACCATGTAGGG	60.474	82
Kenaf-460	CL1445.Contig4_All_1106_5	ACC(3*6)	GCAGTAACCCCGTATGGTACTTA	59.362	AAGGTACCATTGGACTAACCATGT	59.94	97
Kenaf-461	CL1449.Contig4_All_1107_1	CAG(3*5)	GTGACACACTCGAGATCCTTTTC	60.168	ACATTAAGACAAACCGAGGGTCT	60.28	139
Kenaf-462	CL1449.Contig4_All_1107_2	CAG(3*5)	GTGACACACTCGAGATCCTTTTC	60.168	AGTTTCGCCTATGCAACATTAAG	59.712	154
Kenaf-463	CL1449.Contig4_All_1107_3	CAG(3*5)	ACACTCGAGATCCTTTTCTCCTT	59.78	ACATTAAGACAAACCGAGGGTCT	60.28	134
Kenaf-464	CL1449.Contig4_All_1107_4	CAG(3*5)	ACACTCGAGATCCTTTTCTCCTT	59.78	AGTTTCGCCTATGCAACATTAAG	59.712	149
Kenaf-465	CL1449.Contig4_All_1107_5	CAG(3*5)	CACTCGAGATCCTTTTCTCCTTT	60.241	ACATTAAGACAAACCGAGGGTCT	60.28	133
Kenaf-466	CL1453.Contig2_All_1111_1	GCA(3*6)	TATCCTTCAGCAGAAGCAAACTT	59.573	ATGCATTAGGTTTTGTGGTTGAT	59.664	121
Kenaf-467	CL1453.Contig2_All_1111_2	GCA(3*6)	GCCCAAAGTAACAATATCCTTCA	59.407	ATGCATTAGGTTTTGTGGTTGAT	59.664	135
Kenaf-468	CL1453.Contig2_All_1111_3	GCA(3*6)	TGCCCAAAGTAACAATATCCTTC	59.407	ATGCATTAGGTTTTGTGGTTGAT	59.664	136
Kenaf-469	CL1453.Contig2_All_1111_4	GCA(3*6)	TATCCTTCAGCAGAAGCAAACTT	59.573	TAGGTTTTGTGGTTGATTTAGGC	59.445	115
Kenaf-470	CL1469.Contig5_All_1124_1	GCG(3*6)	GTATGATAGGCAGGCCGTTTATT	60.562	GAACCTTGTGAAAGTTTGTTTGG	59.935	156
Kenaf-471	CL1469.Contig5_All_1124_2	GCG(3*6)	AGTTATGGTGCCACCTCAGTATC	59.429	GAACCTTGTGAAAGTTTGTTTGG	59.935	117
Kenaf-472	CL1469.Contig5_All_1124_3	GCG(3*6)	GAGTTATGGTGCCACCTCAGTAT	59.429	GAACCTTGTGAAAGTTTGTTTGG	59.935	118
Kenaf-473	CL1469.Contig5_All_1124_4	GCG(3*6)	AGTTATGGTGCCACCTCAGTATC	59.429	ATTAATCAAACCGAACCTTGTGA	59.765	129
Kenaf-474	CL1469.Contig5_All_1124_5	GCG(3*6)	GAGTTATGGTGCCACCTCAGTAT	59.429	ATTAATCAAACCGAACCTTGTGA	59.765	130
Kenaf-475	CL1479.Contig10_All_1132_1	TTC(3*5)	CGATTCCATGTTCAGTTTCTTTC	59.994	TTCCAAAAACTGATCTAAATTCCC	59.743	159
Kenaf-476	CL1479.Contig10_All_1132_2	TTC(3*5)	TCGATTCCATGTTCAGTTTCTTT	59.994	TTCCAAAAACTGATCTAAATTCCC	59.743	160
Kenaf-477	CL1479.Contig10_All_1132_3	TTC(3*5)	CGATTCCATGTTCAGTTTCTTTC	59.994	TCCAAAAACTGATCTAAATTCCC	58.554	158
Kenaf-478	CL1479.Contig10_All_1132_4	TTC(3*5)	TCGATTCCATGTTCAGTTTCTTT	59.994	TCCAAAAACTGATCTAAATTCCC	58.554	159
Kenaf-479	CL1479.Contig10_All_1132_5	TTC(3*5)	CGATTCCATGTTCAGTTTCTTTC	59.994	CCATCTTAAAACATCTCAAAGCA	58.445	94
Kenaf-480	CL1484.Contig6_All_1136_1	CAG(3*5)	AACAAATCTCTGCGTCTCACAAC	60.715	TAGCCAATTGTTGTGGCTCTAAT	60.036	129
Kenaf-481	CL1484.Contig6_All_1136_2	CAG(3*5)	AACAAATCTCTGCGTCTCACAAC	60.715	ATTAGCCAATTGTTGTGGCTCTA	60.036	131
Kenaf-482	CL1484.Contig6_All_1136_3	CAG(3*5)	AACAAATCTCTGCGTCTCACAA	59.92	TAGCCAATTGTTGTGGCTCTAAT	60.036	129
Kenaf-483	CL1484.Contig6_All_1136_4	CAG(3*5)	AACAAATCTCTGCGTCTCACAA	59.92	ATTAGCCAATTGTTGTGGCTCTA	60.036	131
Kenaf-484	CL1494.Contig2_All_1141_1	TCA(3*5)	ATAATATCGGTGGAGGCACTGTT	60.951	CTTCTGATGCTGCTTTGGAATAG	60.389	123
Kenaf-485	CL1494.Contig2_All_1141_2	TCA(3*5)	AATAATATCGGTGGAGGCACTGT	60.951	CTTCTGATGCTGCTTTGGAATAG	60.389	124
Kenaf-486	CL1494.Contig2_All_1141_3	TCA(3*5)	ACAAGAACGTCGGAAAAGAAAA	60.142	CTTCTGATGCTGCTTTGGAATAG	60.389	160
Kenaf-487	CL1494.Contig2_All_1141_4	TCA(3*5)	AATAATATCGGTGGAGGCACTG	60.224	CTTCTGATGCTGCTTTGGAATAG	60.389	124
Kenaf-488	CL1494.Contig2_All_1141_5	TCA(3*5)	CAATAATATCGGTGGAGGCACT	60.224	CTTCTGATGCTGCTTTGGAATAG	60.389	125
Kenaf-489	CL1495.Contig2_All_1145_2	GAA(3*5)	GGGATTCAGAAGAAGAAGGAAAG	59.729	ACACACCAAAAACAAGCTCCTC	60.568	131
Kenaf-490	CL1495.Contig2_All_1145_3	GAA(3*5)	AGAAGAAGAATTGTTGGACGATG	59.645	ACACACCAAAAACAAGCTCCTC	60.568	94
Kenaf-491	CL1495.Contig2_All_1145_4	GAA(3*5)	CGCAGTATTTTACTGACGACGAT	60.552	ACACACCAAAAACAAGCTCCTC	60.568	158
Kenaf-492	CL1495.Contig5_All_1151_1	TGA(3*5)	CTGAAGTTGAATATGTTGAGGGC	60.014	CGGATCAAATGGATTCTTCTTC	59.909	135
Kenaf-493	CL1495.Contig5_All_1151_2	TGA(3*5)	AATATGTTGAGGGCAACTTTGAA	59.891	CGGATCAAATGGATTCTTCTTC	59.909	126
Kenaf-494	CL1495.Contig5_All_1151_3	TGA(3*5)	TTGAATATGTTGAGGGCAACTTT	59.891	CGGATCAAATGGATTCTTCTTC	59.909	129
Kenaf-495	CL1495.Contig5_All_1151_4	TGA(3*5)	GCAACTTTGAACTTGAAGAGGAA	59.92	TCACTCATCGGATCTTAACTTGAA	60.129	158
Kenaf-496	CL1495.Contig5_All_1151_5	TGA(3*5)	GCAACTTTGAACTTGAAGAGGAA	59.92	TCACTCATCGGATCTTAACTTGA	58.847	158
Kenaf-497	CL1495.Contig8_All_1154_1	TCA(3*5)	CTGAACTTGAAAAATGTGGAAGC	60.156	CTGAAGTTGAATATGTTGAGGGC	60.014	158
Kenaf-498	CL1495.Contig8_All_1154_2	TCA(3*5)	CTGAACTTGAAAAATGTGGAAGC	60.156	GCAACTTTGAACTTGAAGAGGAA	59.92	137
Kenaf-499	CL1495.Contig8_All_1154_3	TCA(3*5)	CTGAACTTGAAAAATGTGGAAGC	60.156	AATATGTTGAGGGCAACTTTGAA	59.891	149
Kenaf-500	CL1495.Contig8_All_1154_4	TCA(3*5)	CTGAACTTGAAAAATGTGGAAGC	60.156	TTGAATATGTTGAGGGCAACTTT	59.891	152
Kenaf-501	CL1495.Contig8_All_1154_5	TCA(3*5)	CTGAACTTGAAAAATGTGGAAGC	60.156	GAATATGTTGAGGGCAACTTTGA	60.358	150
Kenaf-502	CL149.Contig1_All_161_1	CAC(3*6)	AGCAAATTATACCACAAGCTGGA	60.036	CTGTAGAGAAGCCGACAAAACAT	59.833	81
Kenaf-503	CL149.Contig1_All_161_2	CAC(3*6)	GCAAATTATACCACAAGCTGGAA	60.368	CTGTAGAGAAGCCGACAAAACAT	59.833	80
Kenaf-504	CL149.Contig1_All_161_3	CAC(3*6)	AGCAAATTATACCACAAGCTGGA	60.036	ACCTAAAAGCCTGTAGAGAAGCC	59.493	91
Kenaf-505	CL149.Contig1_All_161_4	CAC(3*6)	AGCAAATTATACCACAAGCTGGA	60.036	ATTGGAAACATCGGACCTAAAAG	60.561	105
Kenaf-506	CL149.Contig1_All_161_5	CAC(3*6)	AGCAAATTATACCACAAGCTGGA	60.036	TGTAGAGAAGCCGACAAAACATC	60.656	80
Kenaf-507	CL150.Contig4_All_162_1	CAG(3*7)	AATTTTCATCCCTCTCGAAGAAC	59.965	ACACAAACATGTGCAGTTCCTTT	60.855	114
Kenaf-508	CL150.Contig4_All_162_2	CAG(3*7)	AATCCTGAATTTTCATCCCTCTC	59.804	ACACAAACATGTGCAGTTCCTTT	60.855	121
Kenaf-509	CL150.Contig4_All_162_3	CAG(3*7)	GAATCCTGAATTTTCATCCCTCT	59.804	ACACAAACATGTGCAGTTCCTTT	60.855	122
Kenaf-510	CL150.Contig4_All_162_4	CAG(3*7)	AATTTTCATCCCTCTCGAAGAAC	59.965	CACTGGAACTCCACACAAACAT	59.93	126
Kenaf-511	CL150.Contig4_All_162_5	CAG(3*7)	AATTTTCATCCCTCTCGAAGAAC	59.965	CACAAACATGTGCAGTTCCTTT	60.074	113
Kenaf-512	CL150.Contig5_All_163_1	TGC(3*7)	ACTATTTTCCTTCTGCTGCTGAG	59.231	CAAAGACCAGTAAAGCTAGCCAA	59.959	89
Kenaf-513	CL150.Contig5_All_163_2	TGC(3*7)	ACACGAACATGTGCAACTCTTTT	60.984	CAAAGACCAGTAAAGCTAGCCAA	59.959	129
Kenaf-514	CL150.Contig5_All_163_3	TGC(3*7)	ACATGTGCAACTCTTTTGCATC	60.183	CAAAGACCAGTAAAGCTAGCCAA	59.959	123
Kenaf-515	CL150.Contig5_All_163_4	TGC(3*7)	ACGAACATGTGCAACTCTTTTG	60.211	CAAAGACCAGTAAAGCTAGCCAA	59.959	127
Kenaf-516	CL150.Contig5_All_163_5	TGC(3*7)	CACGAACATGTGCAACTCTTTT	60.211	CAAAGACCAGTAAAGCTAGCCAA	59.959	128
Kenaf-517	CL1512.Contig2_All_1158_1	TAA(3*6)	GAGGAGAACATGCAGAGTTTTTG	60.289	GCCATGTCATCATTTTCTCTCAT	60.342	125
Kenaf-518	CL1512.Contig2_All_1158_2	TAA(3*6)	AGGAGAACATGCAGAGTTTTTGT	59.336	GCCATGTCATCATTTTCTCTCAT	60.342	124
Kenaf-519	CL1512.Contig2_All_1158_3	TAA(3*6)	GAGGAGAACATGCAGAGTTTTTG	60.289	CTGCCATGTCATCATTTTCTCTC	61.002	127
Kenaf-520	CL1512.Contig2_All_1158_4	TAA(3*6)	GGAGGAGAACATGCAGAGTTTTT	60.987	GCCATGTCATCATTTTCTCTCAT	60.342	126
Kenaf-521	CL1512.Contig2_All_1158_5	TAA(3*6)	GAGGAGAACATGCAGAGTTTTTG	60.289	GCCATGTCATCATTTTCTCTCA	60.081	125
Kenaf-522	CL1512.Contig2_All_1159_1	TCT(3*6)	TTTATGAGAGAAAATGATGACATGG	59.407	ATATTATTGCAGTGCATGGCTGT	60.761	142
Kenaf-523	CL1512.Contig2_All_1159_2	TCT(3*6)	ATGATGACATGGCAGCTGAGT	60.704	ATATTATTGCAGTGCATGGCTGT	60.761	129
Kenaf-524	CL1512.Contig2_All_1159_3	TCT(3*6)	TTATGAGAGAAAATGATGACATGG	58.138	ATATTATTGCAGTGCATGGCTGT	60.761	141
Kenaf-525	CL1512.Contig2_All_1159_4	TCT(3*6)	AATGATGACATGGCAGCTGAGT	62.005	ATATTATTGCAGTGCATGGCTGT	60.761	130
Kenaf-526	CL1512.Contig2_All_1159_5	TCT(3*6)	TTTATGAGAGAAAATGATGACATGG	59.407	TAATATTATTGCAGTGCATGGCT	58.734	144
Kenaf-527	CL1519.Contig2_All_1163_1	GGT(3*5)	GAAACACTCGAGTTGCTGAAAAT	59.818	GATCAATCAAAAATTTCCCACAG	59.708	140
Kenaf-528	CL1519.Contig2_All_1163_2	GGT(3*5)	GAAACACTCGAGTTGCTGAAAAT	59.818	CAGATCAATCAAAAATTTCCCAC	59.708	142
Kenaf-529	CL1519.Contig2_All_1163_3	GGT(3*5)	AGAGAGTTCAGAGGTGTGTCGAA	60.475	GATCAATCAAAAATTTCCCACAG	59.708	160
Kenaf-530	CL1519.Contig2_All_1163_4	GGT(3*5)	TCGAGTTGCTGAAAATATCGAAC	60.609	GATCAATCAAAAATTTCCCACAG	59.708	133
Kenaf-531	CL1519.Contig2_All_1163_5	GGT(3*5)	TCGAGTTGCTGAAAATATCGAAC	60.609	AGATCAATCAAAAATTTCCCACA	59.708	134
Kenaf-532	CL1540.Contig2_All_1164_1	AG(2*12)	ATGGTGGGATTAAATAGGCATCT	59.955	TTCCTCTCTTGTTGTTGTATCCG	60.519	137
Kenaf-533	CL1540.Contig2_All_1164_2	AG(2*12)	ATGGTGGGATTAAATAGGCATCT	59.955	ATCCGCACATTTCCAATATTTTT	60.743	119
Kenaf-534	CL1540.Contig2_All_1164_3	AG(2*12)	ATGGTGGGATTAAATAGGCATCT	59.955	GTTGTATCCGCACATTTCCAATA	60.944	124
Kenaf-535	CL1540.Contig2_All_1164_4	AG(2*12)	ATGGTGGGATTAAATAGGCATCT	59.955	CTGCCTCTTCCTCTCTTGTTGT	60.053	144
Kenaf-536	CL1540.Contig2_All_1164_5	AG(2*12)	ATGGTGGGATTAAATAGGCATCT	59.955	CTTGTTGTTGTATCCGCACATT	59.926	130
Kenaf-537	CL1558.Contig2_All_1172_1	TTC(3*5)	AGCTTGAATGGTTGAATCTTGAG	59.776	GTCAACTCCAGCTTTTGCATATC	60.15	134
Kenaf-538	CL1558.Contig2_All_1172_2	TTC(3*5)	AGCTTGAATGGTTGAATCTTGAG	59.776	CCTTTCTCAACACAGTCAACTCC	60.195	148
Kenaf-539	CL1558.Contig2_All_1172_3	TTC(3*5)	AGCTTGAATGGTTGAATCTTGAG	59.776	AGCAATAAAATGGGTAAAGGAGG	59.769	104
Kenaf-540	CL1558.Contig2_All_1172_4	TTC(3*5)	AGCTTGAATGGTTGAATCTTGAG	59.776	CCATCTAGCCTTTCTCAACACAG	60.301	156
Kenaf-541	CL1558.Contig2_All_1172_5	TTC(3*5)	CAACAGCCTTCATCCTAACTCTG	60.301	AGCAATAAAATGGGTAAAGGAGG	59.769	151
Kenaf-542	CL1562.Contig2_All_1173_1	TTTTTG(6*4)	ACATTGGGAGACATCATTACCAG	60.123	TCCTCTACATCTCATACCCAAAAA	59.057	137
Kenaf-543	CL1562.Contig2_All_1173_2	TTTTTG(6*4)	ACATTGGGAGACATCATTACCAG	60.123	TTCCTCTACATCTCATACCCAAAA	59.057	138
Kenaf-544	CL1562.Contig2_All_1173_3	TTTTTG(6*4)	TGGGAGACATCATTACCAGAAAC	60.235	TCCTCTACATCTCATACCCAAAAA	59.057	133
Kenaf-545	CL1562.Contig2_All_1173_4	TTTTTG(6*4)	TGGGAGACATCATTACCAGAAAC	60.235	TTCCTCTACATCTCATACCCAAAA	59.057	134
Kenaf-546	CL1562.Contig2_All_1173_5	TTTTTG(6*4)	ATTGGGAGACATCATTACCAGAA	59.717	TCCTCTACATCTCATACCCAAAAA	59.057	135
Kenaf-547	CL1587.Contig5_All_1194_1	TTC(3*5)	TCCCTCTTCCTCTACTTTCGATT	59.749	GAGTAAGAAGAAGCGTAAGGCGT	60.431	139
Kenaf-548	CL1587.Contig5_All_1194_2	TTC(3*5)	CTCCCTCTTCCTCTACTTTCGAT	59.411	GAGTAAGAAGAAGCGTAAGGCGT	60.431	140
Kenaf-549	CL1587.Contig5_All_1194_3	TTC(3*5)	CTTCATCTTCAACTCCCTCTTCC	60.591	GAGTAAGAAGAAGCGTAAGGCGT	60.431	152
Kenaf-550	CL1587.Contig5_All_1194_4	TTC(3*5)	CCTTCATCTTCAACTCCCTCTTC	60.591	GAGTAAGAAGAAGCGTAAGGCGT	60.431	153
Kenaf-551	CL1587.Contig5_All_1194_5	TTC(3*5)	AACTCCCTCTTCCTCTACTTTCG	59.449	AGAGTAAGAAGAAGCGTAAGGCG	60.542	143
Kenaf-552	CL1594.Contig2_All_1196_1	CAT(3*5)	ATCTTGTGGAAGTGTTTCAATGG	60.268	GGATCTTTGCCTCTTGATTCTTC	60.555	120
Kenaf-553	CL1594.Contig2_All_1196_4	CAT(3*5)	CATCTTGTGGAAGTGTTTCAATG	59.526	GGATCTTTGCCTCTTGATTCTTC	60.555	121
Kenaf-554	CL1594.Contig2_All_1196_5	CAT(3*5)	TCCACACCACAAATGATCCTAAT	60.477	GGATCTTTGCCTCTTGATTCTTC	60.555	149
Kenaf-555	CL1602.Contig5_All_1206_1	AAG(3*5)	GATATGGTCTCAAGCGAGTCATC	60.117	TAGATAACGGAACATCTTCGTCG	60.495	142
Kenaf-556	CL1602.Contig5_All_1206_2	AAG(3*5)	TATGGTCTCAAGCGAGTCATCTT	60.276	TAGATAACGGAACATCTTCGTCG	60.495	140
Kenaf-557	CL1602.Contig5_All_1206_3	AAG(3*5)	TTAACCTCGATATGGTCTCAAGC	59.643	TAGATAACGGAACATCTTCGTCG	60.495	150
Kenaf-558	CL1602.Contig5_All_1206_4	AAG(3*5)	AGCGAGTCATCTTGTGATGAGA	60.02	TTGGAAGAGTTCTCATCTTTTGC	59.885	155
Kenaf-559	CL1616.Contig2_All_1208_1	GAA(3*5)	GTAGCGAGAGGGAATACGAGAGT	60.287	ATGATCGGTCCCTTCACTTTTAT	60.089	104
Kenaf-560	CL1616.Contig2_All_1208_2	GAA(3*5)	AGTAGCGAGAGGGAATACGAGAG	60.404	ATGATCGGTCCCTTCACTTTTAT	60.089	105
Kenaf-561	CL1616.Contig2_All_1208_3	GAA(3*5)	GTAGCGAGAGGGAATACGAGAGT	60.287	CCATCCCTATCCTTCCTAAACAT	59.602	139
Kenaf-562	CL1616.Contig2_All_1208_4	GAA(3*5)	AGTAGCGAGAGGGAATACGAGAG	60.404	CCATCCCTATCCTTCCTAAACAT	59.602	140
Kenaf-563	CL1616.Contig2_All_1208_5	GAA(3*5)	GTAGCGAGAGGGAATACGAGAGT	60.287	ATTAGAGTGCCATCCCTATCCTT	59.399	148
Kenaf-564	CL1630.Contig1_All_1211_1	CAG(3*5)	GATTTATACAAGGAGGAAGGTCC	57.273	TGCTTTCACCCAACATCATTT	60.359	160
Kenaf-565	CL1630.Contig4_All_1212_2	CAG(3*5)	TTATACAAAGACGAAGGTCCAGC	59.68	CTGCTTTCACCCAACATCATTT	61.254	158
Kenaf-566	CL1630.Contig4_All_1212_3	CAG(3*5)	TTATACAAAGACGAAGGTCCAGC	59.68	TGCTTTCACCCAACATCATTT	60.359	157
Kenaf-567	CL1647.Contig4_All_1219_1	AGA(3*7)	TTCTCTTAGATTGCCTGGATCTG	59.864	GGAGAGCTTTCTTTTCCATCACT	60.248	113
Kenaf-568	CL1647.Contig4_All_1219_2	AGA(3*7)	TTCTCTTAGATTGCCTGGATCTG	59.864	ATAGACTCGAAAAAGCAAGAGGG	60.255	158
Kenaf-569	CL1647.Contig4_All_1219_3	AGA(3*7)	TCAATTCTCTTAGATTGCCTGGA	60.21	GGAGAGCTTTCTTTTCCATCACT	60.248	117
Kenaf-570	CL1647.Contig4_All_1219_4	AGA(3*7)	AAACAGAGAGAAAGAGAGCACCA	59.69	GGAGAGCTTTCTTTTCCATCACT	60.248	81
Kenaf-571	CL1647.Contig4_All_1219_5	AGA(3*7)	AAACAGAGAGAAAGAGAGCACCA	59.69	ATAGACTCGAAAAAGCAAGAGGG	60.255	126
Kenaf-572	CL1667.Contig10_All_1224_1	CTC(3*5)	CATGAGCTCCGATCTTTCTTCTA	59.994	GCTGTTGGAGAGACTCTTGGTTA	59.936	152
Kenaf-573	CL1667.Contig10_All_1224_4	CTC(3*5)	CATGAGCTCCGATCTTTCTTCTA	59.994	AGAGACTCTTGGTTAAGGGAGGA	59.774	144
Kenaf-574	CL1667.Contig10_All_1224_5	CTC(3*5)	CATGAGCTCCGATCTTTCTTCTA	59.994	GAGAGACTCTTGGTTAAGGGAGG	59.774	145
Kenaf-575	CL1678.Contig2_All_1225_1	ACC(3*5)	TAGAATCGGAGGGTTTAGGAGAG	60.095	GAATCAAACTAAGGTCTTCGCAA	59.786	138
Kenaf-576	CL1678.Contig2_All_1225_2	ACC(3*5)	TAGAATCGGAGGGTTTAGGAGAG	60.095	TTGAATCAAACTAAGGTCTTCGC	59.786	140
Kenaf-577	CL1678.Contig2_All_1225_3	ACC(3*5)	CTAGAATCGGAGGGTTTAGGAGA	60.095	GAATCAAACTAAGGTCTTCGCAA	59.786	139
Kenaf-578	CL1678.Contig2_All_1225_4	ACC(3*5)	CTAGAATCGGAGGGTTTAGGAGA	60.095	TTGAATCAAACTAAGGTCTTCGC	59.786	141
Kenaf-579	CL1678.Contig2_All_1225_5	ACC(3*5)	ACTAAGCAAACCCTAGAATCGGA	60.478	GAATCAAACTAAGGTCTTCGCAA	59.786	151
Kenaf-580	CL1691.Contig10_All_1229_1	TA(2*10)	TGTTATTAGTTGGGCGTAGCTGT	60.089	GAAAAGAGGCACAGAGAGAAACA	60.047	138
Kenaf-581	CL1691.Contig10_All_1229_2	TA(2*10)	GTGTTATTAGTTGGGCGTAGCTG	60.089	GAAAAGAGGCACAGAGAGAAACA	60.047	139
Kenaf-582	CL1691.Contig10_All_1229_3	TA(2*10)	TGTTATTAGTTGGGCGTAGCTGT	60.089	AGAGGCACAGAGAGAAACAAATG	59.936	134
Kenaf-583	CL1691.Contig10_All_1229_4	TA(2*10)	GTGTTATTAGTTGGGCGTAGCTG	60.089	AGAGGCACAGAGAGAAACAAATG	59.936	135
Kenaf-584	CL1691.Contig10_All_1229_5	TA(2*10)	TGTTATTAGTTGGGCGTAGCTGT	60.089	GAAATGAAGAGAAAAGAGGCACA	59.885	148
Kenaf-585	CL1691.Contig10_All_1230_1	TA(2*10)	GGTTTAGGGTTTAAAATTTCCGA	59.645	GAAGAAGAAGACGACGACTGAGA	60.181	146
Kenaf-586	CL1691.Contig9_All_1228_1	TA(2*10)	GAAGAAGAAGACGACGACTGAGA	60.181	GGTTTAGGGTTTAAAATTTCCGA	59.645	146
Kenaf-587	CL1693.Contig4_All_1232_1	TGGGGC(6*4)	TCTACACCAGGAAATCGTTAAGC	59.68	AGAAGTAGAAGGTCCAGCTCCAG	60.426	97
Kenaf-588	CL1693.Contig4_All_1232_2	TGGGGC(6*4)	TCTACACCAGGAAATCGTTAAGC	59.68	TAGAAGTAGAAGGTCCAGCTCCA	59.552	98
Kenaf-589	CL1693.Contig4_All_1232_3	TGGGGC(6*4)	TCTACACCAGGAAATCGTTAAGC	59.68	ATTCTTTGTGGCAGTCTTTGTTG	60.558	133
Kenaf-590	CL1693.Contig4_All_1232_4	TGGGGC(6*4)	CGAGCAATGAAATTTACCTCAAA	60.464	AGAAGTAGAAGGTCCAGCTCCAG	60.426	149
Kenaf-591	CL1693.Contig4_All_1232_5	TGGGGC(6*4)	CAGATCTACACCAGGAAATCGTT	59.535	AGAAGTAGAAGGTCCAGCTCCAG	60.426	101
Kenaf-592	CL1693.Contig7_All_1233_1	GCTGGT(6*4)	GTTGCAACAGGTGTAGAAGAAAC	57.985	CAACTGCTTCAACAGCTTCTACC	60.469	157
Kenaf-593	CL1693.Contig7_All_1233_2	GCTGGT(6*4)	AGTTGCAACAGGTGTAGAAGAAAC	58.939	CAACTGCTTCAACAGCTTCTACC	60.469	158
Kenaf-594	CL1693.Contig7_All_1233_3	GCTGGT(6*4)	AAGTTGCAACAGGTGTAGAAGAAAC	60.14	CAACTGCTTCAACAGCTTCTACC	60.469	159
Kenaf-595	CL1693.Contig7_All_1233_4	GCTGGT(6*4)	TGCAACAGGTGTAGAAGAAACTG	59.475	CTTCAACAGCTTCTACCGCTAA	58.855	149
Kenaf-596	CL1693.Contig7_All_1233_5	GCTGGT(6*4)	TGCAACAGGTGTAGAAGAAACTG	59.475	GCTTCAACAGCTTCTACCGCTAA	62.155	150
Kenaf-597	CL1697.Contig4_All_1236_1	TA(2*10)	TAATGGGAAACTATTCGCTGAAA	59.98	ACACACAATTGCAAATCAAGATG	59.919	127
Kenaf-598	CL1697.Contig4_All_1236_2	TA(2*10)	AGTTCCCCAATACATCTTCCATT	59.965	CACCAGTGAATCATGCAAAAATA	59.882	155
Kenaf-599	CL1697.Contig4_All_1236_3	TA(2*10)	AAACTATTCGCTGAAAACGATGA	60.141	ACACACAATTGCAAATCAAGATG	59.919	120
Kenaf-600	CL1697.Contig4_All_1236_4	TA(2*10)	GAAACTATTCGCTGAAAACGATG	60.141	ACACACAATTGCAAATCAAGATG	59.919	121
Kenaf-601	CL1697.Contig4_All_1236_5	TA(2*10)	CATTTTCGAACCCTCTTTTCTCT	60.115	CACCAGTGAATCATGCAAAAATA	59.882	136
Kenaf-602	CL1704.Contig3_All_1244_1	AGC(3*8)	GGGTTTTCTTCTCTTTTACCGAA	59.995	CTTCCTTAGACAAGTGGCTGCTA	60.082	154
Kenaf-603	CL1704.Contig3_All_1244_2	AGC(3*8)	GGGTTTTCTTCTCTTTTACCGAA	59.995	TTCATCTTCCTTAGACAAGTGGC	59.776	159
Kenaf-604	CL1704.Contig3_All_1244_3	AGC(3*8)	GGGTTTTCTTCTCTTTTACCGAA	59.995	CATCTTCCTTAGACAAGTGGCTG	60.301	157
Kenaf-605	CL1704.Contig3_All_1244_4	AGC(3*8)	CTTTTACCGAAGAAGCTGGAGTT	60.286	CTTCCTTAGACAAGTGGCTGCTA	60.082	142
Kenaf-606	CL1704.Contig3_All_1244_5	AGC(3*8)	GGGTTTTCTTCTCTTTTACCGAA	59.995	CCTTAGACAAGTGGCTGCTAAAG	59.626	151
Kenaf-607	CL1713.Contig1_All_1245_1	GAG(3*5)	GTGTCCTCCTCTTCCCGTCT	60.648	CGTTCATTTTCCTTCAATCAGTAA	59.556	160
Kenaf-608	CL1713.Contig1_All_1245_2	GAG(3*5)	GTGTCCTCCTCTTCCCGTCT	60.648	CGTTCATTTTCCTTCAATCAGTA	58.311	160
Kenaf-609	CL1713.Contig1_All_1245_3	GAG(3*5)	TGTCCTCCTCTTCCCGTCT	59.776	CGTTCATTTTCCTTCAATCAGTAA	59.556	159
Kenaf-610	CL1713.Contig1_All_1245_4	GAG(3*5)	CTCCTCTTCCCGTCTCCAT	59.191	AACACCGTTCATTTTCCTTCAAT	60.941	160
Kenaf-611	CL1713.Contig1_All_1245_5	GAG(3*5)	TGTCCTCCTCTTCCCGTCT	59.776	CCGTTCATTTTCCTTCAATCAGT	61.534	160
Kenaf-612	CL1715.Contig1_All_1246_1	CCT(3*7)	GAAAAACGTCTGAAATCCACATC	59.87	CATTGAGTCTGTCTTTACCTGGG	60.04	157
Kenaf-613	CL1715.Contig1_All_1246_2	CCT(3*7)	GAAAAACGTCTGAAATCCACATC	59.87	ATTGAGTCTGTCTTTACCTGGGG	60.747	156
Kenaf-614	CL1715.Contig1_All_1246_3	CCT(3*7)	AAAACGTCTGAAATCCACATCC	60.228	CATTGAGTCTGTCTTTACCTGGG	60.04	155
Kenaf-615	CL1715.Contig1_All_1246_4	CCT(3*7)	GAAAAACGTCTGAAATCCACATC	59.87	TTCATTGAGTCTGTCTTTACCTGG	59.69	159
Kenaf-616	CL1715.Contig1_All_1246_5	CCT(3*7)	AAAAACGTCTGAAATCCACATCC	61.425	CATTGAGTCTGTCTTTACCTGGG	60.04	156
Kenaf-617	CL1724.Contig1_All_1247_1	GGA(3*5)	GTTGTTGCCATTTCCTCTTGTAG	60.048	AAGGGGATGCAGAATTCTTAGAC	59.984	148
Kenaf-618	CL1724.Contig1_All_1247_2	GGA(3*5)	GTTGTTGCCATTTCCTCTTGTAG	60.048	AAAAGGGGATGCAGAATTCTTAG	59.982	150
Kenaf-619	CL1724.Contig1_All_1247_3	GGA(3*5)	GATGATAATTCGGGTTGTGTTGT	60	TTTATCAGACTCCAATTCCGCTA	60.102	110
Kenaf-620	CL1724.Contig1_All_1247_4	GGA(3*5)	CGAAGCAACAACAATGATGATAA	60.013	TTTATCAGACTCCAATTCCGCTA	60.102	125
Kenaf-621	CL1724.Contig1_All_1247_5	GGA(3*5)	AACAATGATGATAATTCGGGTTG	59.963	TTTATCAGACTCCAATTCCGCTA	60.102	116
Kenaf-622	CL1742.Contig3_All_1248_1	GA(2*6)	TCGAAGATTTCCGATACGATAAC	59.496	AGCTTACTGCCATTCTTCCTTCT	59.934	160
Kenaf-623	CL1742.Contig3_All_1248_2	GA(2*6)	CTCGAAGATTTCCGATACGATAA	59.616	GCTTACTGCCATTCTTCCTTCTT	60.262	160
Kenaf-624	CL1742.Contig3_All_1248_3	GA(2*6)	TCGAAGATTTCCGATACGATAAC	59.496	GCTTACTGCCATTCTTCCTTCTT	60.262	159
Kenaf-625	CL1742.Contig3_All_1248_4	GA(2*6)	CTCGAAGATTTCCGATACGATAAC	60.333	GCTTACTGCCATTCTTCCTTCTT	60.262	160
Kenaf-626	CL1742.Contig3_All_1248_5	GA(2*6)	AACTCGAAGATTTCCGATACGAT	60.335	TGCCATTCTTCCTTCTTATTCGT	61.266	156
Kenaf-627	CL1762.Contig1_All_1267_1	CT(2*9)	ACAGAATTTGCCACAGCCTATAA	60.036	TCAGTGAAGGGAATATTGGTCAC	60.235	139
Kenaf-628	CL1762.Contig1_All_1267_2	CT(2*9)	ACAGAATTTGCCACAGCCTATAA	60.036	GTCAGTGAAGGGAATATTGGTCA	60.235	140
Kenaf-629	CL1762.Contig1_All_1267_3	CT(2*9)	GAATTTGCCACAGCCTATAAATG	59.884	TCAGTGAAGGGAATATTGGTCAC	60.235	136
Kenaf-630	CL1762.Contig1_All_1267_4	CT(2*9)	GAATTTGCCACAGCCTATAAATG	59.884	GTCAGTGAAGGGAATATTGGTCA	60.235	137
Kenaf-631	CL1762.Contig1_All_1267_5	CT(2*9)	CAAAATTGGAAAACAGAATTTGC	59.878	TCAGTGAAGGGAATATTGGTCAC	60.235	151
Kenaf-632	CL1769.Contig1_All_1268_1	AAG(3*5)	CGGTTGTTGCTAAGAAAGCTAAA	59.963	AGCAGCATCATCCATATCTTTGT	60.007	155
Kenaf-633	CL1769.Contig1_All_1268_2	AAG(3*5)	CGGTTGTTGCTAAGAAAGCTAAA	59.963	TTTTTCTTCTCCTTCTCAGGCTT	60.011	130
Kenaf-634	CL1769.Contig1_All_1268_3	AAG(3*5)	CGGTTGTTGCTAAGAAAGCTAAA	59.963	TTTCTTCTCCTTCTCAGGCTTCT	60.135	128
Kenaf-635	CL1769.Contig1_All_1268_4	AAG(3*5)	GGATGAAAGTGGTAATAGCCCTC	60.212	TTTTTCTTCTCCTTCTCAGGCTT	60.011	156
Kenaf-636	CL1769.Contig1_All_1268_5	AAG(3*5)	CGGTTGTTGCTAAGAAAGCTAAA	59.963	TCTTCTCCTTCTCAGGCTTCTCT	60.266	126
Kenaf-637	CL1771.Contig1_All_1271_1	CAG(3*5)	TGATCAGAACCCTTCACAAGATT	59.99	TTACGGTTTACGCCACTGTTACT	59.999	150
Kenaf-638	CL1771.Contig1_All_1271_2	CAG(3*5)	TTGATCAGAACCCTTCACAAGAT	59.99	TTACGGTTTACGCCACTGTTACT	59.999	151
Kenaf-639	CL1771.Contig1_All_1271_3	CAG(3*5)	TCACAAGATTTCAGCTTTGTTCA	59.912	TTACGGTTTACGCCACTGTTACT	59.999	137
Kenaf-640	CL1771.Contig1_All_1271_4	CAG(3*5)	TTGATCAGAACCCTTCACAAGAT	59.99	GTTTACGCCACTGTTACTCTTGG	60.102	146
Kenaf-641	CL1771.Contig1_All_1271_5	CAG(3*5)	CTTTGATCAGAACCCTTCACAAG	60.151	TTACGGTTTACGCCACTGTTACT	59.999	153
Kenaf-642	CL1779.Contig6_All_1278_1	ACATAT(6*4)	AATGAATATGCTTATGTGCTGCC	60.364	GACTGAGATGCTTTTTACATGCC	60.15	158
Kenaf-643	CL1779.Contig6_All_1278_2	ACATAT(6*4)	AATGAATATGCTTATGTGCTGCC	60.364	GAGATGCTTTTTACATGCCTCAT	59.648	154
Kenaf-644	CL1779.Contig6_All_1278_3	ACATAT(6*4)	AATGAATATGCTTATGTGCTGCC	60.364	TGACTGAGATGCTTTTTACATGC	59.42	159
Kenaf-645	CL1779.Contig6_All_1278_4	ACATAT(6*4)	GAATATGCTTATGTGCTGCCATC	60.839	GACTGAGATGCTTTTTACATGCC	60.15	155
Kenaf-646	CL1779.Contig6_All_1278_5	ACATAT(6*4)	AATGAATATGCTTATGTGCTGCC	60.364	ACTGAGATGCTTTTTACATGCCT	59.342	157
Kenaf-647	CL1780.Contig2_All_1280_1	TG(2*6)	CAATCACCGCGTAAACATCTTAT	60.264	CTCCCTCTACTTCCCCTCTTACA	60.128	137
Kenaf-648	CL1780.Contig2_All_1280_2	TG(2*6)	CAATCACCGCGTAAACATCTTAT	60.264	GGCAAAGGAACACCTACTTCTCT	60.175	160
Kenaf-649	CL1780.Contig2_All_1280_3	TG(2*6)	CAATCACCGCGTAAACATCTTAT	60.264	CCTCTACTTCCCCTCTTACAAGC	59.804	134
Kenaf-650	CL1780.Contig2_All_1280_4	TG(2*6)	AAGTGTCGAAACAAGAAAGATGC	59.818	ACAGTCACATAAGCAATGGGAAC	60.296	155
Kenaf-651	CL1780.Contig2_All_1280_5	TG(2*6)	ACCAAGTGTCGAAACAAGAAAGA	60.192	ACAGTCACATAAGCAATGGGAAC	60.296	158
Kenaf-652	CL1781.Contig1_All_1281_1	GCT(3*6)	GCTGAGCAGGGTATATCGACTAA	59.791	CATTTCACTCACAAACAAATCCA	59.89	132
Kenaf-653	CL1781.Contig1_All_1281_2	GCT(3*6)	GGAAAAGACTCAGTGTCCTGTTG	60.195	TAGGCTGGTTGATTCTGAACAGT	60.178	117
Kenaf-654	CL1781.Contig1_All_1281_3	GCT(3*6)	GCTGAGCAGGGTATATCGACTAA	59.791	GCACTCATCATTTCACTCACAAA	60.169	140
Kenaf-655	CL1781.Contig1_All_1281_4	GCT(3*6)	GCTGAGCAGGGTATATCGACTAA	59.791	GTTGCACTCATCATTTCACTCAC	59.659	143
Kenaf-656	CL1781.Contig1_All_1281_5	GCT(3*6)	AAAGACTCAGTGTCCTGTTGAGG	59.831	TTTTCATAGGCTGGTTGATTCTG	60.476	120
Kenaf-657	CL1788.Contig3_All_1284_3	AGA(3*5)	CCCCAAAACTCTGATAACAACAC	59.791	CTTGCCCTTCACCTTCTTATTTT	60.014	144
Kenaf-658	CL1788.Contig3_All_1284_4	AGA(3*5)	AACAGAGTTAAGAAATCGGACCC	59.894	TAGCTTCAACTTCTCTCGCTTGT	59.854	118
Kenaf-659	CL180.Contig1_All_165_1	ATA(3*7)	TTCCAACATTTAGGAAAACGAAA	59.872	TCTTCTTTTCTCATCATTTTGTTCC	60.001	139
Kenaf-660	CL180.Contig1_All_165_2	ATA(3*7)	TGGGAAAGAGAGTAACAATGGAA	59.987	AAAGATGATGACTTTGTTGAGGA	57.853	133
Kenaf-661	CL180.Contig1_All_165_3	ATA(3*7)	CGAAAATGATCCTAGATCCTCAC	59.104	TTTTCTCATCATTTTGTTCCTCA	58.729	116
Kenaf-662	CL180.Contig1_All_165_4	ATA(3*7)	ACGAAAATGATCCTAGATCCTCA	59.104	TTTTCTCATCATTTTGTTCCTCA	58.729	117
Kenaf-663	CL180.Contig1_All_165_5	ATA(3*7)	CGAAAATGATCCTAGATCCTCAC	59.104	CTTTTCTCATCATTTTGTTCCTCA	59.646	117
Kenaf-664	CL180.Contig1_All_168_1	TGG(3*6)	ACACCGTTGGTGAAAGATTTG	59.883	TGTTAAAGCCATGGAAGTAGCTC	59.806	135
Kenaf-665	CL180.Contig1_All_168_2	TGG(3*6)	GTTGGTGAAAGATTTGGGCTT	60.346	TGTTAAAGCCATGGAAGTAGCTC	59.806	130
Kenaf-666	CL180.Contig1_All_168_3	TGG(3*6)	GACACCGTTGGTGAAAGATTTG	61.673	TGTTAAAGCCATGGAAGTAGCTC	59.806	136
Kenaf-667	CL180.Contig1_All_168_4	TGG(3*6)	AGGACACCGTTGGTGAAAGAT	60.792	TGTTAAAGCCATGGAAGTAGCTC	59.806	138
Kenaf-668	CL180.Contig1_All_168_5	TGG(3*6)	ACACCGTTGGTGAAAGATTTG	59.883	ATGTTAAAGCCATGGAAGTAGCTC	60.051	136
Kenaf-669	CL180.Contig1_All_169_1	GGC(3*5)	TGGGTCTTTTTGCTATGTTTGTT	59.926	GGAGGAGCATTAGATTTAGAGCC	59.75	157
Kenaf-670	CL180.Contig1_All_169_2	GGC(3*5)	TTGGGTCTTTTTGCTATGTTTGT	59.926	GGAGGAGCATTAGATTTAGAGCC	59.75	158
Kenaf-671	CL180.Contig1_All_169_3	GGC(3*5)	CTATGTTTGTTTGGGAGGATTTG	59.76	GGAGGAGCATTAGATTTAGAGCC	59.75	145
Kenaf-672	CL180.Contig1_All_169_4	GGC(3*5)	CTATGTTTGTTTGGGAGGATTTG	59.76	ACCACTTGGAGGAGCATTAGATT	60.373	152
Kenaf-673	CL180.Contig1_All_169_5	GGC(3*5)	TTTTTGCTATGTTTGTTTGGGAG	60.372	GGAGGAGCATTAGATTTAGAGCC	59.75	151
Kenaf-674	CL180.Contig2_All_171_1	TCT(3*6)	GCAACACTAAAGACAAGCAGTGA	59.616	CTCTTCGTCTTCTTCTTTCCCTC	60.009	144
Kenaf-675	CL180.Contig2_All_171_2	TCT(3*6)	AGAAACGAAGGAGAGTAAGCTGC	60.546	TTGGATCCTTCTTTTTCCTCTTC	60.063	121
Kenaf-676	CL180.Contig2_All_171_3	TCT(3*6)	AGAAACGAAGGAGAGTAAGCTGC	60.546	TCCTCTTGTCCCTCTCTACCTTT	59.774	83
Kenaf-677	CL180.Contig2_All_171_4	TCT(3*6)	AAACGAAGGAGAGTAAGCTGCAT	60.771	CTCTTCGTCTTCTTCTTTCCCTC	60.009	102
Kenaf-678	CL180.Contig2_All_171_5	TCT(3*6)	AGAAACGAAGGAGAGTAAGCTGC	60.546	CATTTGGATCCTTCTTTTTCCTC	60.289	124
Kenaf-679	CL180.Contig3_All_172_1	AGA(3*6)	TGGCCCTTTATAAATAACCCACT	59.985	AGAAGAGAAAGGAGGAGAAACGA	60.009	103
Kenaf-680	CL180.Contig3_All_172_2	AGA(3*6)	CTGGCCCTTTATAAATAACCCAC	59.985	AGAAGAGAAAGGAGGAGAAACGA	60.009	104
Kenaf-681	CL180.Contig3_All_172_3	AGA(3*6)	TGGCCCTTTATAAATAACCCACT	59.985	AGGAGGAGAAACGAAGGAGAGTA	59.902	94
Kenaf-682	CL180.Contig3_All_172_4	AGA(3*6)	CTGGCCCTTTATAAATAACCCAC	59.985	AGGAGGAGAAACGAAGGAGAGTA	59.902	95
Kenaf-683	CL180.Contig3_All_172_5	AGA(3*6)	TGGCCCTTTATAAATAACCCACT	59.985	GGAGGAGAAACGAAGGAGAGTAA	60.241	93
Kenaf-684	CL180.Contig3_All_173_1	CGG(3*6)	TCGTTTCTCCTCCTTTCTCTTCT	60.009	GGAGGAGCATTAGATTTAGAGCC	59.75	147
Kenaf-685	CL180.Contig3_All_173_2	CGG(3*6)	TCGTTTCTCCTCCTTTCTCTTCT	60.009	ACCACTTGGAGGAGCATTAGATT	60.373	154
Kenaf-686	CL180.Contig3_All_173_3	CGG(3*6)	TTCGTTTCTCCTCCTTTCTCTTC	60.347	GGAGGAGCATTAGATTTAGAGCC	59.75	148
Kenaf-687	CL180.Contig3_All_173_4	CGG(3*6)	TCACTGCTTGTCTTTAGTGTTGC	59.616	GGAGGAGCATTAGATTTAGAGCC	59.75	122
Kenaf-688	CL180.Contig3_All_173_5	CGG(3*6)	GCTTACTCTCCTTCGTTTCTCCT	59.58	GGAGGAGCATTAGATTTAGAGCC	59.75	159
Kenaf-689	CL180.Contig4_All_175_1	TCT(3*6)	AGAAGAGAAAGGAGGAGAAACGA	60.009	TTGGATTCAGGATTTTCAACTGT	59.864	115
Kenaf-690	CL180.Contig4_All_175_2	TCT(3*6)	AGAAGAGAAAGGAGGAGAAACGA	60.009	TGTTTGGATTCAGGATTTTCAAC	60.21	118
Kenaf-691	CL180.Contig4_All_175_3	TCT(3*6)	AGGAGGAGAAACGAAGGAGAGTA	59.902	TTGGATTCAGGATTTTCAACTGT	59.864	106
Kenaf-692	CL180.Contig4_All_175_4	TCT(3*6)	AGGAGGAGAAACGAAGGAGAGTA	59.902	TGTTTGGATTCAGGATTTTCAAC	60.21	109
Kenaf-693	CL180.Contig4_All_175_5	TCT(3*6)	AGAAGAGAAAGGAGGAGAAACGA	60.009	TTTGGATTCAGGATTTTCAACTG	60.33	116
Kenaf-694	CL1811.Contig1_All_1293_1	GAC(3*5)	GTTGTTCGAAAGTCAATCACCAC	60.807	ATCCACTTCGCAAAATGATAAAA	59.864	146
Kenaf-695	CL1811.Contig1_All_1293_2	GAC(3*5)	GTTGTTCGAAAGTCAATCACCAC	60.807	AATCCACTTCGCAAAATGATAAA	59.864	147
Kenaf-696	CL1811.Contig1_All_1293_3	GAC(3*5)	TTCGAAAGTCAATCACCACAAGT	60.927	ATCCACTTCGCAAAATGATAAAA	59.864	142
Kenaf-697	CL1811.Contig1_All_1293_4	GAC(3*5)	TTCGAAAGTCAATCACCACAAGT	60.927	AATCCACTTCGCAAAATGATAAA	59.864	143
Kenaf-698	CL1811.Contig1_All_1293_5	GAC(3*5)	GTTCGAAAGTCAATCACCACAAG	60.927	ATCCACTTCGCAAAATGATAAAA	59.864	143
Kenaf-699	CL1814.Contig11_All_1298_1	TGC(3*5)	ACACCAGAAACCTATCCTCTTCC	59.888	CCTTGTCAGATTCAAGGGTGTAT	59.402	133
Kenaf-700	CL1814.Contig11_All_1298_2	TGC(3*5)	GCCTTTAACAAAAGTTGAACCAG	59.254	CAATCACTGCTTTTCTTTGCTTT	59.946	160
Kenaf-701	CL1814.Contig11_All_1298_3	TGC(3*5)	ACCAGAAACCTATCCTCTTCCAA	60.347	CCTTGTCAGATTCAAGGGTGTAT	59.402	131
Kenaf-702	CL1814.Contig11_All_1298_4	TGC(3*5)	AGAAAGCTTCCAGGCAATGTAA	60.257	AATTGTACAAGGCAATCACTGCT	60.075	151
Kenaf-703	CL1814.Contig11_All_1298_5	TGC(3*5)	GCCTTTAACAAAAGTTGAACCAG	59.254	CCTTGTCAGATTCAAGGGTGTAT	59.402	99
Kenaf-704	CL1814.Contig14_All_1299_1	GCA(3*5)	CCTTGTCAGATTCAAGGGTGTAT	59.402	ACACCAGAAACCTATCCTCTTCC	59.888	133
Kenaf-705	CL1814.Contig14_All_1299_2	GCA(3*5)	CAATCACTGCTTTTCTTTGCTTT	59.946	GCCTTTAACAAAAGTTGAACCAG	59.254	160
Kenaf-706	CL1814.Contig14_All_1299_3	GCA(3*5)	CCTTGTCAGATTCAAGGGTGTAT	59.402	ACCAGAAACCTATCCTCTTCCAA	60.347	131
Kenaf-707	CL1814.Contig14_All_1299_4	GCA(3*5)	AATTGTACAAGGCAATCACTGCT	60.075	AGAAAGCTTCCAGGCAATGTAA	60.257	151
Kenaf-708	CL1814.Contig14_All_1299_5	GCA(3*5)	CCTTGTCAGATTCAAGGGTGTAT	59.402	GCCTTTAACAAAAGTTGAACCAG	59.254	99
Kenaf-709	CL181.Contig22_All_185_1	CT(2*9)	TTGTGCCGGTTTAGTTGTATGTA	59.476	GGGGAAAAAGAAGAAAAATGAGA	59.943	160
Kenaf-710	CL181.Contig22_All_185_2	CT(2*9)	GTGCCGGTTTAGTTGTATGTACG	60.685	GGGGAAAAAGAAGAAAAATGAGA	59.943	158
Kenaf-711	CL181.Contig22_All_185_3	CT(2*9)	TGCCGGTTTAGTTGTATGTACG	59.946	GGGGAAAAAGAAGAAAAATGAGA	59.943	157
Kenaf-712	CL181.Contig22_All_185_4	CT(2*9)	GTATGTACGAAGACGGATTTTCC	58.944	GGGGAAAAAGAAGAAAAATGAGA	59.943	144
Kenaf-713	CL181.Contig22_All_185_5	CT(2*9)	CCGGTTTAGTTGTATGTACGAAGA	59.51	GGGGAAAAAGAAGAAAAATGAGA	59.943	155
Kenaf-714	CL1820.Contig1_All_1302_1	TCATG(5*4)	AGGCTGTTGTTGATAAGGACAAA	60.048	TCATCATTTTGCATAGACATTGC	59.984	155
Kenaf-715	CL1820.Contig1_All_1302_2	TCATG(5*4)	GGCTGTTGTTGATAAGGACAAAC	59.926	TCATCATTTTGCATAGACATTGC	59.984	154
Kenaf-716	CL1820.Contig1_All_1302_3	TCATG(5*4)	GTTGATAAGGACAAACGTTCCTG	59.92	TCATCATTTTGCATAGACATTGC	59.984	147
Kenaf-717	CL1820.Contig1_All_1302_4	TCATG(5*4)	TTGTTGATAAGGACAAACGTTCC	60.263	TCATCATTTTGCATAGACATTGC	59.984	149
Kenaf-718	CL1820.Contig1_All_1302_5	TCATG(5*4)	GCAATGATTTGAAGTTCCAGTTT	59.536	TCATCATTTTGCATAGACATTGC	59.984	116
Kenaf-719	CL1820.Contig5_All_1303_1	ACATG(5*4)	TCATCATTTTGCATAGACATTGC	59.984	AGGCTGTTGTTGATAAGGACAAA	60.048	155
Kenaf-720	CL1820.Contig5_All_1303_2	ACATG(5*4)	TCATCATTTTGCATAGACATTGC	59.984	GGCTGTTGTTGATAAGGACAAAC	59.926	154
Kenaf-721	CL1820.Contig5_All_1303_3	ACATG(5*4)	TCATCATTTTGCATAGACATTGC	59.984	GTTGATAAGGACAAACGTTCCTG	59.92	147
Kenaf-722	CL1820.Contig5_All_1303_4	ACATG(5*4)	TCATCATTTTGCATAGACATTGC	59.984	TTGTTGATAAGGACAAACGTTCC	60.263	149
Kenaf-723	CL1820.Contig5_All_1303_5	ACATG(5*4)	TCATCATTTTGCATAGACATTGC	59.984	GCAATGATTTGAAGTTCCAGTTT	59.536	116
Kenaf-724	CL1821.Contig3_All_1304_1	GGTT(4*5)	GAAAATCTGGCAAAGCTAGTCAA	59.912	GTATGGTTTTTGCACTTGACACA	59.955	90
Kenaf-725	CL1821.Contig3_All_1304_2	GGTT(4*5)	GAAAATCTGGCAAAGCTAGTCAA	59.912	TGTATGGTTTTTGCACTTGACAC	59.955	91
Kenaf-726	CL1821.Contig3_All_1304_3	GGTT(4*5)	GAAAATCTGGCAAAGCTAGTCAA	59.912	TGGTTTTTGCACTTGACACATAG	60.082	87
Kenaf-727	CL1821.Contig3_All_1304_4	GGTT(4*5)	AAATCTGGCAAAGCTAGTCAATG	59.806	GTATGGTTTTTGCACTTGACACA	59.955	88
Kenaf-728	CL1821.Contig3_All_1304_5	GGTT(4*5)	AAATCTGGCAAAGCTAGTCAATG	59.806	TGTATGGTTTTTGCACTTGACAC	59.955	89
Kenaf-729	CL1828.Contig7_All_1307_1	CAG(3*5)	ACCTTTCTTTTCCGACAAATCTC	59.998	AAAGAACTGTACCTGAGACGGGT	60.445	137
Kenaf-730	CL1828.Contig7_All_1307_2	CAG(3*5)	GACCTTTCTTTTCCGACAAATCT	59.998	AAAGAACTGTACCTGAGACGGGT	60.445	138
Kenaf-731	CL1828.Contig7_All_1307_3	CAG(3*5)	AGACCTTTCTTTTCCGACAAATC	59.998	AAAGAACTGTACCTGAGACGGGT	60.445	139
Kenaf-732	CL1828.Contig7_All_1307_4	CAG(3*5)	GACCTTTCTTTTCCGACAAATCT	59.998	ATTGTTGAAAACAGAGGGAGTTG	59.552	111
Kenaf-733	CL1828.Contig7_All_1307_5	CAG(3*5)	TCCAAACAACAGTATTTCAAGCC	60.389	GTCGAGATTGTTGAAAACAGAGG	60.158	157
Kenaf-734	CL1828.Contig9_All_1308_1	CAG(3*5)	CAGGAGCAGCTTATCAAACATCT	59.926	GTCGAGATTGTTGAAAACAGAGG	60.158	159
Kenaf-735	CL1828.Contig9_All_1308_2	CAG(3*5)	GAAATATTGGAGAGGGAGATTGG	60.154	GTCGAGATTGTTGAAAACAGAGG	60.158	129
Kenaf-736	CL1828.Contig9_All_1308_3	CAG(3*5)	GAAATATTGGAGAGGGAGATTGG	60.154	GGTCGAGATTGTTGAAAACAGAG	60.158	130
Kenaf-737	CL1828.Contig9_All_1308_4	CAG(3*5)	GATTGGTAGGCTTAGAGCCTTGT	60.16	GGTCGAGATTGTTGAAAACAGAG	60.158	113
Kenaf-738	CL1828.Contig9_All_1308_5	CAG(3*5)	ACAGGAGCAGCTTATCAAACATC	59.803	GTCGAGATTGTTGAAAACAGAGG	60.158	160
Kenaf-739	CL182.Contig16_All_205_1	TGA(3*8)	CTGCTAGGAGCAGTAACAGAAGC	59.874	GAAACAAATTCTGTGAGCTCTGG	60.289	155
Kenaf-740	CL182.Contig16_All_205_2	TGA(3*8)	CAGTAACAGAAGCTGATGATCCA	59.392	GAAACAAATTCTGTGAGCTCTGG	60.289	145
Kenaf-741	CL182.Contig16_All_205_3	TGA(3*8)	AAGCTGATGATCCAAAGGAAAAC	60.811	GAAACAAATTCTGTGAGCTCTGG	60.289	136
Kenaf-742	CL182.Contig16_All_205_4	TGA(3*8)	GGAGCAGTAACAGAAGCTGATGA	60.937	GAAACAAATTCTGTGAGCTCTGG	60.289	149
Kenaf-743	CL182.Contig16_All_205_5	TGA(3*8)	AAGCTGATGATCCAAAGGAAAA	60.075	GAAACAAATTCTGTGAGCTCTGG	60.289	136
Kenaf-744	CL1835.Contig2_All_1312_1	GACTC(5*4)	ACTCGAAATTTCATCAACTCGAC	59.65	AGTAATTGTTTCGGTTAGGGGTG	60.488	152
Kenaf-745	CL1835.Contig2_All_1312_2	GACTC(5*4)	TCGAAATTTCATCAACTCGACTC	60.607	AGTAATTGTTTCGGTTAGGGGTG	60.488	150
Kenaf-746	CL1835.Contig2_All_1312_3	GACTC(5*4)	TCGACTCGAAATTTCATCAACTC	60.607	AGTAATTGTTTCGGTTAGGGGTG	60.488	155
Kenaf-747	CL1835.Contig2_All_1312_4	GACTC(5*4)	ACTCGAAATTTCATCAACTCGAC	59.65	AAGTAATTGTTTCGGTTAGGGGT	59.252	153
Kenaf-748	CL1835.Contig2_All_1312_5	GACTC(5*4)	ACTCGAAATTTCATCAACTCGAC	59.65	TGTTTCGGTTAGGGGTGAGTATT	60.95	146
Kenaf-749	CL1837.Contig3_All_1315_1	GGCTTA(6*4)	TCTTCACCTTGGATCCTCTTTTT	60.452	ATAATTCAAGGCTCGTCGTTAGG	60.816	159
Kenaf-750	CL1837.Contig3_All_1315_2	GGCTTA(6*4)	ATCTTCACCTTGGATCCTCTTTT	59.501	ATAATTCAAGGCTCGTCGTTAGG	60.816	160
Kenaf-751	CL1837.Contig3_All_1315_3	GGCTTA(6*4)	TCTTCACCTTGGATCCTCTTTTT	60.452	AATAATTCAAGGCTCGTCGTTAG	58.895	160
Kenaf-752	CL1837.Contig3_All_1315_4	GGCTTA(6*4)	CTTCACCTTGGATCCTCTTTTTG	61.299	CAATAATTCAAGGCTCGTCGTTA	60.482	160
Kenaf-753	CL1837.Contig3_All_1315_5	GGCTTA(6*4)	TTCACCTTGGATCCTCTTTTTG	60.455	CAATAATTCAAGGCTCGTCGTTA	60.482	159
Kenaf-754	CL1838.Contig6_All_1316_1	GAAGGA(6*4)	TTAGTGTCGTTCGACTGTTTTCA	59.836	AAATTACTGCTACTGGTTTCCCC	59.799	132
Kenaf-755	CL1838.Contig6_All_1316_2	GAAGGA(6*4)	TTAGTGTCGTTCGACTGTTTTCA	59.836	AGCATCCAAATTACTGCTACTGG	59.7	139
Kenaf-756	CL1838.Contig6_All_1316_3	GAAGGA(6*4)	TTAGTGTCGTTCGACTGTTTTCA	59.836	GAGTAACACCTCCTAGCATCCAA	59.666	153
Kenaf-757	CL1838.Contig6_All_1316_4	GAAGGA(6*4)	TTAGTGTCGTTCGACTGTTTTCA	59.836	TTGAGTAACACCTCCTAGCATCC	59.666	155
Kenaf-758	CL1838.Contig6_All_1316_5	GAAGGA(6*4)	TTAGTGTCGTTCGACTGTTTTCA	59.836	GCATCCAAATTACTGCTACTGGT	59.578	138
Kenaf-759	CL1838.Contig7_All_1317_2	GAAGGA(6*4)	GATGGCGAATACATTGTTTTGTT	60.128	AAATTACTGCTACTGGTTTCCCC	59.799	157
Kenaf-760	CL1838.Contig7_All_1317_3	GAAGGA(6*4)	GGCGAATACATTGTTTTGTTTGT	60.16	AAATTACTGCTACTGGTTTCCCC	59.799	154
Kenaf-761	CL1838.Contig7_All_1317_5	GAAGGA(6*4)	AGATGGCGAATACATTGTTTTGT	59.791	AAATTACTGCTACTGGTTTCCCC	59.799	158
Kenaf-762	CL1853.Contig3_All_1325_1	TA(2*7)	TAATATCCGCGATTCCCTAAAAT	60.041	AGCGTAGAGAAACAAACAAGCAC	60.002	81
Kenaf-763	CL1853.Contig3_All_1325_2	TA(2*7)	TAATATCCGCGATTCCCTAAAAT	60.041	GATTCTCGAGCGTAGAGAAACAA	60.035	89
Kenaf-764	CL1853.Contig3_All_1325_3	TA(2*7)	TAATATCCGCGATTCCCTAAAAT	60.041	TTCTCGAGCGTAGAGAAACAAAC	60.069	87
Kenaf-765	CL1853.Contig3_All_1325_4	TA(2*7)	TAATATCCGCGATTCCCTAAAAT	60.041	AATTTGGGATTCCTTTTCAAGTC	59.725	147
Kenaf-766	CL1853.Contig3_All_1325_5	TA(2*7)	TAATATCCGCGATTCCCTAAAAT	60.041	GAATTTGGGATTCCTTTTCAAGT	59.725	148
Kenaf-767	CL1877.Contig2_All_1326_1	AAG(3*5)	CAAGACGAAGTGATTGTTATGGA	59.144	TCTCTTTGTATCGGTTTCCATTG	60.35	143
Kenaf-768	CL1877.Contig2_All_1326_2	AAG(3*5)	AGCAATTCAGATGAGAATGGAAG	59.739	AAAATACATTCTTCGAGATGGGA	59.006	151
Kenaf-769	CL1877.Contig2_All_1326_3	AAG(3*5)	GCAATTCAGATGAGAATGGAAGT	59.612	AAAATACATTCTTCGAGATGGGA	59.006	150
Kenaf-770	CL1877.Contig2_All_1326_4	AAG(3*5)	ACAAGACGAAGTGATTGTTATGGA	59.934	TCTCTTTGTATCGGTTTCCATTG	60.35	144
Kenaf-771	CL1877.Contig2_All_1326_5	AAG(3*5)	TGGAAGACTCTAGGTAACCATGC	59.666	GTTTCCATTGAAATTACAGGTCC	58.791	111
Kenaf-772	CL1895.Contig3_All_1335_1	CA(2*8)	TGGAACATGGATATTGCTTTATTT	58.86	AGCACTACTTTTCCAAGTCGGTA	59.377	159
Kenaf-773	CL1895.Contig3_All_1335_2	CA(2*8)	TGGAACATGGATATTGCTTTATT	57.615	AGCACTACTTTTCCAAGTCGGTA	59.377	159
Kenaf-774	CL1895.Contig3_All_1335_3	CA(2*8)	TGGAACATGGATATTGCTTTATTT	58.86	GAGCACTACTTTTCCAAGTCGGT	61.031	160
Kenaf-775	CL1895.Contig3_All_1335_4	CA(2*8)	TGGAACATGGATATTGCTTTATT	57.615	GAGCACTACTTTTCCAAGTCGGT	61.031	160
Kenaf-776	CL1895.Contig3_All_1335_5	CA(2*8)	TGGAACATGGATATTGCTTTATTT	58.86	GAGCACTACTTTTCCAAGTCGG	60.295	160
Kenaf-777	CL1898.Contig11_All_1341_3	AAG(3*5)	ATTCTTCCATGGTTGCATTTTC	60.191	GTTCATCATCTAAGGCTGCAAAC	60.15	90
Kenaf-778	CL1898.Contig11_All_1341_4	AAG(3*5)	GATTCTTCCATGGTTGCATTTT	60.191	GTTCATCATCTAAGGCTGCAAAC	60.15	91
Kenaf-779	CL1898.Contig11_All_1341_5	AAG(3*5)	ATGAAGGAGATGCATCCGTAACT	61.209	GTTCATCATCTAAGGCTGCAAAC	60.15	153
Kenaf-780	CL1898.Contig9_All_1339_1	TGA(3*6)	GATGATGAAGATGAAGGAGATGC	60.06	AAGCCGTGCTTTTCTTCTTAGAT	59.938	133
Kenaf-781	CL1898.Contig9_All_1339_2	TGA(3*6)	GATGCATCTGTACCTGAATCCAC	60.767	AAGCCGTGCTTTTCTTCTTAGAT	59.938	115
Kenaf-782	CL1898.Contig9_All_1339_3	TGA(3*6)	TGATGATGAAGATGAAGGAGATG	59.14	AAGCCGTGCTTTTCTTCTTAGAT	59.938	134
Kenaf-783	CL1898.Contig9_All_1339_4	TGA(3*6)	GATGCATCTGTACCTGAATCCAC	60.767	ACCCTCTTCATCTTCAAGGTCAT	60.363	156
Kenaf-784	CL1898.Contig9_All_1339_5	TGA(3*6)	TGCTTGATGATGAAGATGAAGG	60.214	AAGCCGTGCTTTTCTTCTTAGAT	59.938	138
Kenaf-785	CL1900.Contig1_All_1342_1	GAGAA(5*4)	AAAAATACCCCCAGATTTCTGAC	59.622	ACTTTCCCTCCTCTTTTTCTCCT	60.114	144
Kenaf-786	CL1900.Contig1_All_1342_2	GAGAA(5*4)	TCCAACACTTCCAGCAAAAATAC	60.389	ACTTTCCCTCCTCTTTTTCTCCT	60.114	159
Kenaf-787	CL1900.Contig1_All_1342_3	GAGAA(5*4)	TTCCTAGTTTAGCGTTTGGTGTG	60.554	ACTTTCCCTCCTCTTTTTCTCCT	60.114	111
Kenaf-788	CL1900.Contig1_All_1342_4	GAGAA(5*4)	CCCAGATTTCTGACTATGGGTTT	60.576	ACTTTCCCTCCTCTTTTTCTCCT	60.114	135
Kenaf-789	CL1900.Contig1_All_1342_5	GAGAA(5*4)	AAAAATACCCCCAGATTTCTGAC	59.622	TCTTTTTCTCCTCTCCTCTCCTC	59.608	133
Kenaf-790	CL1908.Contig3_All_1344_1	TC(2*8)	TCTCGATCGACACTGTACATCAC	60.194	TATTGTCATGAGCTCGGTAAAGC	60.628	145
Kenaf-791	CL1908.Contig3_All_1344_2	TC(2*8)	CTCGATCGACACTGTACATCACT	59.295	TATTGTCATGAGCTCGGTAAAGC	60.628	144
Kenaf-792	CL1908.Contig3_All_1344_3	TC(2*8)	TCTCGATCGACACTGTACATCAC	60.194	CGTATTGTCATGAGCTCGGTAA	60.152	147
Kenaf-793	CL1908.Contig3_All_1344_4	TC(2*8)	TCTCGATCGACACTGTACATCAC	60.194	CGTATTGTCATGAGCTCGGTAAA	61.36	147
Kenaf-794	CL1908.Contig3_All_1344_5	TC(2*8)	TGATATCAGAACCTCGTCTCGAT	60.11	CTTGTGATATCCGAGCACCTTT	60.503	120
Kenaf-795	CL1909.Contig6_All_1348_1	ATG(3*7)	GACTTTCAAGGATTGCTGTCAGT	59.809	GTGGGATCAGTCCATATCAGAAG	59.841	158
Kenaf-796	CL1909.Contig6_All_1348_2	ATG(3*7)	TCTGCTGTGCTTTACTGAGAGAA	59.457	TGGGATCAGTCCATATCAGAAGT	59.841	118
Kenaf-797	CL1909.Contig6_All_1348_3	ATG(3*7)	TCTGCTGTGCTTTACTGAGAGAA	59.457	GTGGGATCAGTCCATATCAGAAG	59.841	119
Kenaf-798	CL1909.Contig6_All_1348_4	ATG(3*7)	TTCTGCTGTGCTTTACTGAGAGA	59.457	TGGGATCAGTCCATATCAGAAGT	59.841	119
Kenaf-799	CL1909.Contig6_All_1348_5	ATG(3*7)	TTCTGCTGTGCTTTACTGAGAGA	59.457	GTGGGATCAGTCCATATCAGAAG	59.841	120
Kenaf-800	CL1909.Contig7_All_1349_1	ATC(3*7)	GATTCCCTTAAGTCTTGCACTCA	59.776	ATCTTGGTTTTACATGGTGCAGT	59.818	130
Kenaf-801	CL1909.Contig7_All_1349_2	ATC(3*7)	TGAGATTCCCTTAAGTCTTGCAC	59.776	ATCTTGGTTTTACATGGTGCAGT	59.818	133
Kenaf-802	CL1909.Contig7_All_1349_3	ATC(3*7)	TTCCCTTAAGTCTTGCACTCAAA	60.275	ATCTTGGTTTTACATGGTGCAGT	59.818	128
Kenaf-803	CL1909.Contig7_All_1349_4	ATC(3*7)	TTCCCTTAAGTCTTGCACTCAAA	60.275	TTACATGGTGCAGTGCTTTACTG	60.234	119
Kenaf-804	CL1909.Contig7_All_1349_5	ATC(3*7)	TTTGTTACCTTGGCTTGAGATTC	59.659	ATCTTGGTTTTACATGGTGCAGT	59.818	148
Kenaf-805	CL1925.Contig1_All_1361_1	ATT(3*5)	TTGCTTTGCATAACATATTGGTG	59.909	CCATAACACCCTCAAATCAATGT	59.994	148
Kenaf-806	CL1925.Contig1_All_1361_2	ATT(3*5)	GCTTTGCATAACATATTGGTGGT	60.148	CCATAACACCCTCAAATCAATGT	59.994	146
Kenaf-807	CL1925.Contig1_All_1361_3	ATT(3*5)	GGGCATGTTTGCATTTAGTTATC	59.766	AATGCTCTAATGCTCCCATAACA	60.003	122
Kenaf-808	CL1925.Contig1_All_1361_4	ATT(3*5)	GGGCATGTTTGCATTTAGTTATC	59.766	CCATAACACCCTCAAATCAATGT	59.994	107
Kenaf-809	CL1925.Contig1_All_1361_5	ATT(3*5)	TTGCATAACATATTGGTGGTGTC	59.644	AATGCTCTAATGCTCCCATAACA	60.003	158
Kenaf-810	CL1925.Contig2_All_1362_1	ATT(3*5)	CCAATCTCACTTTTTGATTTTCG	59.991	TGCTCTAATGTTCCCATAACACC	60.25	146
Kenaf-811	CL1925.Contig2_All_1362_2	ATT(3*5)	GCATTTGCATTTAGTTGCCTAGT	59.717	GAGCCTCTCACGAAATAATCTCA	59.87	138
Kenaf-812	CL1925.Contig2_All_1362_3	ATT(3*5)	GCATTTGCATTTAGTTGCCTAGT	59.717	TGCTCTAATGTTCCCATAACACC	60.25	105
Kenaf-813	CL1925.Contig2_All_1362_4	ATT(3*5)	ATTTTCGAGAGTCATCCCAACTT	60.354	TGCTCTAATGTTCCCATAACACC	60.25	130
Kenaf-814	CL1925.Contig2_All_1362_5	ATT(3*5)	TTTTTGATTTTCGAGAGTCATCC	59.601	TGCTCTAATGTTCCCATAACACC	60.25	136
Kenaf-815	CL1932.Contig1_All_1364_1	AT(2*9)	TCAATTTTGTGGAAATAACTGCC	60.226	AATGCCTCTCCAGTATACACCAC	59.429	154
Kenaf-816	CL1932.Contig1_All_1364_2	AT(2*9)	TAACTGCCTTCTGAACATAGCCT	59.467	ACCGGTAATAATAATGCCTCTCC	59.641	151
Kenaf-817	CL1932.Contig1_All_1364_3	AT(2*9)	TTTGTGGAAATAACTGCCTTCTG	60.506	AATGCCTCTCCAGTATACACCAC	59.429	149
Kenaf-818	CL1932.Contig1_All_1364_4	AT(2*9)	TAACTGCCTTCTGAACATAGCCT	59.467	AATGCCTCTCCAGTATACACCAC	59.429	139
Kenaf-819	CL1932.Contig1_All_1364_5	AT(2*9)	CAATTTTGTGGAAATAACTGCCT	59.445	AATGCCTCTCCAGTATACACCAC	59.429	153
Kenaf-820	CL1933.Contig1_All_1365_1	TTC(3*5)	CTTATGAAGGAGAGCACAACCAT	59.666	ATCAAGTCCAGAGTTACAGCGG	60.68	160
Kenaf-821	CL1933.Contig1_All_1365_2	TTC(3*5)	ACTTATGAAGGAGAGCACAACCA	60.178	TCAAGTCCAGAGTTACAGCGG	60.438	160
Kenaf-822	CL1933.Contig1_All_1365_3	TTC(3*5)	CTTATGAAGGAGAGCACAACCAT	59.666	TCAAGTCCAGAGTTACAGCGG	60.438	159
Kenaf-823	CL1933.Contig1_All_1365_4	TTC(3*5)	ACTTATGAAGGAGAGCACAACCA	60.178	AGTCCAGAGTTACAGCGGGAG	60.822	157
Kenaf-824	CL1933.Contig1_All_1365_5	TTC(3*5)	CTTATGAAGGAGAGCACAACCAT	59.666	AGTCCAGAGTTACAGCGGGAG	60.822	156
Kenaf-825	CL1954.Contig2_All_1374_1	TTC(3*5)	GATTATCATCGGCTCGAGTAAAG	59.285	TGGTAATCTTGAAATCCCAGAAA	59.83	155
Kenaf-826	CL1954.Contig2_All_1374_2	TTC(3*5)	AGATTATCATCGGCTCGAGTAAA	59.285	TGGTAATCTTGAAATCCCAGAAA	59.83	156
Kenaf-827	CL1954.Contig2_All_1374_3	TTC(3*5)	ATTATCATCGGCTCGAGTAAAGG	60.789	TGGTAATCTTGAAATCCCAGAAA	59.83	154
Kenaf-828	CL1954.Contig2_All_1374_4	TTC(3*5)	GATTATCATCGGCTCGAGTAAAG	59.285	CTGGTAATCTTGAAATCCCAGAA	59.489	156
Kenaf-829	CL1954.Contig2_All_1374_5	TTC(3*5)	AGATTATCATCGGCTCGAGTAAA	59.285	CTGGTAATCTTGAAATCCCAGAA	59.489	157
Kenaf-830	CL1964.Contig2_All_1375_1	TGG(3*7)	AACACTGGAACTCGTGGAGG	60.151	CCCACCACTTTTAATTTTGTTCA	60.128	141
Kenaf-831	CL1964.Contig2_All_1375_2	TGG(3*7)	ACACTGGAACTCGTGGAGGAAT	62.207	CCCACCACTTTTAATTTTGTTCA	60.128	140
Kenaf-832	CL1964.Contig2_All_1375_3	TGG(3*7)	AACACTGGAACTCGTGGAGGAAT	63.33	CCCACCACTTTTAATTTTGTTCA	60.128	141
Kenaf-833	CL1964.Contig2_All_1375_4	TGG(3*7)	CACTGGAACTCGTGGAGGAAT	61.458	CCCACCACTTTTAATTTTGTTCA	60.128	139
Kenaf-834	CL1964.Contig2_All_1375_5	TGG(3*7)	AACACTGGAACTCGTGGAGG	60.151	TAACATCAGTGTCTTGAAACCCA	59.526	160
Kenaf-835	CL1964.Contig3_All_1376_1	CAC(3*7)	CCCACCACTTTTAATTTTGTTCA	60.128	AACACTGGAACTCGTGGAGG	60.151	141
Kenaf-836	CL1964.Contig3_All_1376_2	CAC(3*7)	CCCACCACTTTTAATTTTGTTCA	60.128	ACACTGGAACTCGTGGAGGAAT	62.207	140
Kenaf-837	CL1964.Contig3_All_1376_3	CAC(3*7)	CCCACCACTTTTAATTTTGTTCA	60.128	AACACTGGAACTCGTGGAGGAAT	63.33	141
Kenaf-838	CL1964.Contig3_All_1376_4	CAC(3*7)	CCCACCACTTTTAATTTTGTTCA	60.128	CACTGGAACTCGTGGAGGAAT	61.458	139
Kenaf-839	CL1964.Contig3_All_1376_5	CAC(3*7)	TAACATCAGTGTCTTGAAACCCA	59.526	AACACTGGAACTCGTGGAGG	60.151	160
Kenaf-840	CL1964.Contig5_All_1377_1	CAC(3*7)	CAGCAACCTCCTCTGAAACAC	59.899	GCTTGTAAAGTAGTTCCAGGCAA	59.841	160
Kenaf-841	CL1964.Contig5_All_1377_2	CAC(3*7)	ACAGCAACCTCCTCTGAAACAC	60.721	TGTAAAGTAGTTCCAGGCAAACG	60.554	158
Kenaf-842	CL1964.Contig5_All_1377_3	CAC(3*7)	AACAGCAACCTCCTCTGAAACAC	61.938	TGTAAAGTAGTTCCAGGCAAACG	60.554	159
Kenaf-843	CL1964.Contig5_All_1377_4	CAC(3*7)	CAGCAACCTCCTCTGAAACAC	59.899	TGTAAAGTAGTTCCAGGCAAACG	60.554	157
Kenaf-844	CL1964.Contig5_All_1377_5	CAC(3*7)	ACAGCAACCTCCTCTGAAACA	59.899	TGTAAAGTAGTTCCAGGCAAACG	60.554	158
Kenaf-845	CL1964.Contig6_All_1378_1	TGG(3*7)	GCTTGTAAAGTAGTTCCAGGCAA	59.841	CAGCAACCTCCTCTGAAACAC	59.899	160
Kenaf-846	CL1964.Contig6_All_1378_2	TGG(3*7)	TGTAAAGTAGTTCCAGGCAAACG	60.554	ACAGCAACCTCCTCTGAAACAC	60.721	158
Kenaf-847	CL1964.Contig6_All_1378_3	TGG(3*7)	TGTAAAGTAGTTCCAGGCAAACG	60.554	AACAGCAACCTCCTCTGAAACAC	61.938	159
Kenaf-848	CL1964.Contig6_All_1378_4	TGG(3*7)	TGTAAAGTAGTTCCAGGCAAACG	60.554	CAGCAACCTCCTCTGAAACAC	59.899	157
Kenaf-849	CL1964.Contig6_All_1378_5	TGG(3*7)	TGTAAAGTAGTTCCAGGCAAACG	60.554	ACAGCAACCTCCTCTGAAACA	59.899	158
Kenaf-850	CL196.Contig3_All_227_1	CGC(3*5)	GCAAAGATGGTGACTTAGTTGTG	58.827	TTGAATCCTTATAGGCACGTCTC	59.643	158
Kenaf-851	CL196.Contig3_All_227_2	CGC(3*5)	AGCAAAGATGGTGACTTAGTTGTG	59.753	TTGAATCCTTATAGGCACGTCTC	59.643	159
Kenaf-852	CL196.Contig3_All_227_3	CGC(3*5)	GCAAAGATGGTGACTTAGTTGTGT	59.629	TTGAATCCTTATAGGCACGTCTC	59.643	158
Kenaf-853	CL196.Contig3_All_227_4	CGC(3*5)	GCAAAGATGGTGACTTAGTTGTG	58.827	GATTGAATCCTTATAGGCACGTC	59.031	160
Kenaf-854	CL196.Contig3_All_227_5	CGC(3*5)	GCAAAGATGGTGACTTAGTTGTG	58.827	ATTGAATCCTTATAGGCACGTCTC	59.899	159
Kenaf-855	CL1973.Contig3_All_1379_1	GGGCTA(6*4)	ATGTGGGGTGCAGAAGAGTAGTA	60.068	CTAACAATCCTCCCAGCTCAAGT	60.995	124
Kenaf-856	CL1973.Contig3_All_1379_2	GGGCTA(6*4)	TAAGAGTAAGGGACAGGAGAGGG	60.128	CTAACAATCCTCCCAGCTCAAGT	60.995	103
Kenaf-857	CL1973.Contig3_All_1379_3	GGGCTA(6*4)	ATGTGGGGTGCAGAAGAGTAGTA	60.068	TAACAATCCTCCCAGCTCAAGT	60.13	123
Kenaf-858	CL1973.Contig3_All_1379_4	GGGCTA(6*4)	TAAGAGTAAGGGACAGGAGAGGG	60.128	TAACAATCCTCCCAGCTCAAGT	60.13	102
Kenaf-859	CL1973.Contig3_All_1379_5	GGGCTA(6*4)	TGGGGTGCAGAAGAGTAGTAAGA	60.301	CTAACAATCCTCCCAGCTCAAGT	60.995	121
Kenaf-860	CL1973.Contig4_All_1380_1	TCGTTG(6*4)	TCCTTGCTAAACTTTGTTCTTGC	59.946	GTTGGATGAGTACCAACATCACC	60.531	129
Kenaf-861	CL1976.Contig1_All_1381_1	TCG(3*5)	TCATCATGATATTCGTTGTCGTC	59.843	AGAACGAATCCAAGAGCGATTA	60.224	159
Kenaf-862	CL1976.Contig1_All_1381_2	TCG(3*5)	TCATCATGATATTCGTTGTCGTC	59.843	AACGAATCCAAGAGCGATTAAG	59.758	157
Kenaf-863	CL1976.Contig1_All_1381_3	TCG(3*5)	TCATCATGATATTCGTTGTCGTC	59.843	GAACGAATCCAAGAGCGATTAAG	61.384	158
Kenaf-864	CL1976.Contig1_All_1381_4	TCG(3*5)	ATGATATTCGTTGTCGTCATCAT	58.342	TATCAGAGAACGAATCCAAGAGC	59.87	160
Kenaf-865	CL1976.Contig1_All_1381_5	TCG(3*5)	CATGATATTCGTTGTCGTCATCA	60.767	ATCAGAGAACGAATCCAAGAGC	59.855	160
Kenaf-866	CL1984.Contig1_All_1388_1	CTT(3*5)	GAGATTTCTGAGGCTGTAGGACA	59.899	ACCAATGCTTTGTCTTCAACAGT	60.089	142
Kenaf-867	CL1984.Contig1_All_1388_3	CTT(3*5)	GAACGAGATTTCTGAGGCTGTAG	59.556	ACCAATGCTTTGTCTTCAACAGT	60.089	146
Kenaf-868	CL1984.Contig1_All_1388_4	CTT(3*5)	GAGATTTCTGAGGCTGTAGGACA	59.899	CCAATGCTTTGTCTTCAACAGTA	59.322	141
Kenaf-869	CL1990.Contig3_All_1389_2	GCT(3*5)	GGCTTTCTAGGCCTTCTGAACTA	60.376	ACCAGAGCTTTCTGGTCTTTCTC	60.414	137
Kenaf-870	CL1992.Contig4_All_1392_4	CCG(3*6)	GCCTTTGTTAGTGGCTGTTCC	61.029	TCTAATACTAGACTCGGCCGTTG	59.821	105
Kenaf-871	CL1992.Contig4_All_1392_5	CCG(3*6)	GCCTTTGTTAGTGGCTGTTCC	61.029	CAGGCTCGGCTTCTTCTAATACT	60.395	119
Kenaf-872	CL1992.Contig7_All_1395_2	CCG(3*5)	ATCCACAAAACGACGAAATCAAG	62.397	CTTCTTCTCCTAAGAGACTCGGC	60.155	135
Kenaf-873	CL1992.Contig7_All_1395_3	CCG(3*5)	CCACAAAACGACGAAATCAAG	60.52	CTTCTTCTCCTAAGAGACTCGGC	60.155	133
Kenaf-874	CL19.Contig3_All_14_1	ATA(3*5)	GTAATGGGTCTGATGGGTTGTAA	59.994	AGGTAGAGCAGGCTTAGAATTGG	60.274	148
Kenaf-875	CL19.Contig3_All_14_2	ATA(3*5)	GTAATGGGTCTGATGGGTTGTAA	59.994	TTTGAAGGTAGAGCAGGCTTAGA	59.695	153
Kenaf-876	CL19.Contig3_All_14_3	ATA(3*5)	TGGGTCTGATGGGTTGTAAATAA	60.457	AGGTAGAGCAGGCTTAGAATTGG	60.274	144
Kenaf-877	CL19.Contig3_All_14_4	ATA(3*5)	TAATGGGTCTGATGGGTTGTAAA	60.457	AGGTAGAGCAGGCTTAGAATTGG	60.274	147
Kenaf-878	CL19.Contig3_All_14_5	ATA(3*5)	GTAATGGGTCTGATGGGTTGTAA	59.994	TTTTGAAGGTAGAGCAGGCTTAG	59.254	154
Kenaf-879	CL19.Contig4_All_15_1	TTA(3*5)	CTTAGTTTGGTCAGGATTTGGTG	59.914	TAGAGTCTTGGGCTCCTCTTCTT	60.029	157
Kenaf-880	CL19.Contig4_All_15_2	TTA(3*5)	CTTAGTTTGGTCAGGATTTGGTG	59.914	GTAGAGTCTTGGGCTCCTCTTCT	59.563	158
Kenaf-881	CL19.Contig4_All_15_3	TTA(3*5)	GATTTGGTGGTTTTGAAGGTAGA	59.403	TAGAGTCTTGGGCTCCTCTTCTT	60.029	143
Kenaf-882	CL19.Contig4_All_15_4	TTA(3*5)	GCTTAGTTTGGTCAGGATTTGGT	60.735	TAGAGTCTTGGGCTCCTCTTCTT	60.029	158
Kenaf-883	CL19.Contig4_All_15_5	TTA(3*5)	AGGTAGAGCAGGCTTAGAATTGG	60.274	TCTTCATCTGGTAAATTCAAGGG	59.489	156
Kenaf-884	CL19.Contig4_All_16_1	GAA(3*6)	AAGAAGAGGAGCCCAAGACTCTA	60.029	AAGCTCAGAGAAATAATCCCCAC	59.984	156
Kenaf-885	CL19.Contig4_All_16_2	GAA(3*6)	AAGAAGAGGAGCCCAAGACTCTA	60.029	CATGAAGAAAGTCAACACCCAAT	60.268	92
Kenaf-886	CL19.Contig4_All_16_3	GAA(3*6)	AAGAAGAGGAGCCCAAGACTCTA	60.029	GGGATTCATGAAGAAAGTCAACA	60.346	98
Kenaf-887	CL19.Contig4_All_16_4	GAA(3*6)	AAGAAGAGGAGCCCAAGACTCTA	60.029	TGAAGAAAGTCAACACCCAATTC	60.379	90
Kenaf-888	CL19.Contig4_All_16_5	GAA(3*6)	AAGAAGAGGAGCCCAAGACTCTA	60.029	GAAGGGATTCATGAAGAAAGTCA	59.585	101
Kenaf-889	CL2019.Contig1_All_1402_1	TTC(3*6)	GCGTACCAGATGTCTTCTCAAAT	59.672	GCATAGGGGATTATCATTCAGGT	60.408	87
Kenaf-890	CL2019.Contig1_All_1402_2	TTC(3*6)	GCGTACCAGATGTCTTCTCAAAT	59.672	GGTGAGCATAGGGGATTATCATT	60.408	92
Kenaf-891	CL2019.Contig1_All_1402_3	TTC(3*6)	GCGTACCAGATGTCTTCTCAAAT	59.672	CATAGGGGATTATCATTCAGGTG	59.58	86
Kenaf-892	CL2019.Contig1_All_1402_4	TTC(3*6)	GCGTACCAGATGTCTTCTCAAAT	59.672	AGCATAGGGGATTATCATTCAGG	60.522	88
Kenaf-893	CL2019.Contig1_All_1402_5	TTC(3*6)	TACCAGATGTCTTCTCAAATCCG	60.489	GCATAGGGGATTATCATTCAGGT	60.408	84
Kenaf-894	CL2019.Contig1_All_1403_1	AGAAC(5*4)	AGAACGACCCAACATGTTTTATG	60.156	TGTAGTGCCTGGTTTCTTTTGTT	60.082	108
Kenaf-895	CL2019.Contig1_All_1403_2	AGAAC(5*4)	AGAACGACCCAACATGTTTTATG	60.156	CAGATCTGTAGTGCCTGGTTTCT	59.824	114
Kenaf-896	CL2019.Contig1_All_1403_3	AGAAC(5*4)	AGAACGACCCAACATGTTTTATG	60.156	CTGTAGTGCCTGGTTTCTTTTGT	59.74	109
Kenaf-897	CL2019.Contig1_All_1403_4	AGAAC(5*4)	TAGATTCTCAGGCCTAAAGCTCC	60.346	TGTAGTGCCTGGTTTCTTTTGTT	60.082	147
Kenaf-898	CL2019.Contig1_All_1403_5	AGAAC(5*4)	GCTCCCAGTTCTAGATAACCCAG	60.49	TGTAGTGCCTGGTTTCTTTTGTT	60.082	129
Kenaf-899	CL201.Contig8_All_236_1	ACA(3*5)	AAATGGTTCATGCTAACACCTTG	60.282	TTTCTTCTTCTTTTCGTTGCTTTT	59.944	144
Kenaf-900	CL201.Contig8_All_236_2	ACA(3*5)	AAATGGTTCATGCTAACACCTTG	60.282	GCCAACCACAACTACTTTCTTCTT	60.095	159
Kenaf-901	CL201.Contig8_All_236_3	ACA(3*5)	ACACCTTGCATGTCAGACAGATA	59.676	TTTCTTCTTCTTTTCGTTGCTTTT	59.944	129
Kenaf-902	CL201.Contig8_All_236_4	ACA(3*5)	ATGTTGGCAATGAGTAAATGGTT	59.664	TTTCTTCTTCTTTTCGTTGCTTTT	59.944	159
Kenaf-903	CL201.Contig8_All_236_5	ACA(3*5)	AAATGGTTCATGCTAACACCTTG	60.282	GCCAACCACAACTACTTTCTTCT	58.884	159
Kenaf-904	CL203.Contig5_All_237_1	GAA(3*5)	GTGTGATGGGTTTTCTGGATAGA	60.235	CATTCTTTCCTTCGACCCTTTAT	59.861	138
Kenaf-905	CL203.Contig5_All_237_2	GAA(3*5)	GTGTGATGGGTTTTCTGGATAGA	60.235	CTCAACACATTCTTTCCTTCGAC	60.158	145
Kenaf-906	CL203.Contig5_All_237_3	GAA(3*5)	GTGTGATGGGTTTTCTGGATAGA	60.235	CAAGCTCAACACATTCTTTCCTT	59.812	149
Kenaf-907	CL203.Contig5_All_237_4	GAA(3*5)	ACGAGAGTGAAGTGGAACTGAAA	60.329	CATTCTTTCCTTCGACCCTTTAT	59.861	112
Kenaf-908	CL203.Contig5_All_237_5	GAA(3*5)	TGTGATGGGTTTTCTGGATAGAG	60.359	CTCAACACATTCTTTCCTTCGAC	60.158	144
Kenaf-909	CL2045.Contig1_All_1406_1	CCT(3*5)	CTCCTCTTTCTCTTTCTCTTCCC	59.154	ATTAGCAGATCGCAAAGGTGAAT	61.293	121
Kenaf-910	CL2045.Contig1_All_1406_2	CCT(3*5)	CCTCCTCTTTCTCTTTCTCTTCC	59.154	ATTAGCAGATCGCAAAGGTGAAT	61.293	122
Kenaf-911	CL2045.Contig1_All_1406_3	CCT(3*5)	CTTTCTCTTTCTCTTCCCCTTCC	61.006	ATTAGCAGATCGCAAAGGTGAAT	61.293	116
Kenaf-912	CL2045.Contig1_All_1406_4	CCT(3*5)	TCCTCATCTCCTTCACAATTCTC	59.705	ATTAGCAGATCGCAAAGGTGAA	61.102	158
Kenaf-913	CL2045.Contig1_All_1406_5	CCT(3*5)	CCTCTTTCTCTTTCTCTTCCCC	59.833	ATTAGCAGATCGCAAAGGTGAAT	61.293	119
Kenaf-914	CL2051.Contig5_All_1409_1	TTC(3*5)	GGGTATTATCCGACCACATTTTT	60.19	CTGGCAAAGAAGTAAGCAATCTT	59.132	154
Kenaf-915	CL2051.Contig5_All_1409_2	TTC(3*5)	GGGTATTATCCGACCACATTTTT	60.19	GCTGGCAAAGAAGTAAGCAATCT	61.215	155
Kenaf-916	CL2051.Contig5_All_1409_3	TTC(3*5)	GGGTATTATCCGACCACATTTTT	60.19	GCTGGCAAAGAAGTAAGCAATC	60.391	155
Kenaf-917	CL2051.Contig5_All_1409_4	TTC(3*5)	GGGTATTATCCGACCACATTTTT	60.19	GTTCTGCTGGCAAAGAAGTAAGC	61.718	160
Kenaf-918	CL2051.Contig5_All_1409_5	TTC(3*5)	GGGAAAATTGTCATTTAAGTACCC	59.112	GAAGTTGATTTTTGTTCTGCTGG	60.156	146
Kenaf-919	CL2055.Contig1_All_1410_1	TAT(3*5)	TGCAAGAATCTGATGCAATACAA	60.633	TCAAAGCAATATGCAGTTTCAGA	59.903	152
Kenaf-920	CL2055.Contig1_All_1410_2	TAT(3*5)	TTGCAAGAATCTGATGCAATACA	60.633	TCAAAGCAATATGCAGTTTCAGA	59.903	153
Kenaf-921	CL2055.Contig1_All_1410_3	TAT(3*5)	TCATTTGTCTCTTGTCTGACCAAT	60.04	TCAAAGCAATATGCAGTTTCAGA	59.903	107
Kenaf-922	CL2055.Contig1_All_1410_4	TAT(3*5)	CAATACCGCCATATTTGTCAGA	59.853	CAAACAGTGTCTGAATCATGGAA	60.023	159
Kenaf-923	CL2055.Contig1_All_1410_5	TAT(3*5)	AGTTGCAAGAATCTGATGCAATA	58.914	TCAAAGCAATATGCAGTTTCAGA	59.903	155
Kenaf-924	CL2088.Contig1_All_1422_1	CTC(3*5)	CGTAATCCTCAACCAGTTCATGT	60.289	GGAGGAAGAAAAAGCTCTCAAAG	60.011	127
Kenaf-925	CL2088.Contig1_All_1422_2	CTC(3*5)	TACAAATTGCGGTTTCTAAGGTG	60.391	GGAGGAAGAAAAAGCTCTCAAAG	60.011	80
Kenaf-926	CL2088.Contig1_All_1422_3	CTC(3*5)	TGTACAAATTGCGGTTTCTAAGG	60.391	GGAGGAAGAAAAAGCTCTCAAAG	60.011	82
Kenaf-927	CL2088.Contig1_All_1422_4	CTC(3*5)	TACAAATTGCGGTTTCTAAGGTG	60.391	CTGATCTTCGTTTCTTCCTTCAA	59.879	139
Kenaf-928	CL2088.Contig1_All_1422_5	CTC(3*5)	TGTACAAATTGCGGTTTCTAAGG	60.391	CTGATCTTCGTTTCTTCCTTCAA	59.879	141
Kenaf-929	CL2093.Contig10_All_1429_1	AT(2*11)	GAGGTAGGCAAATTTGGATTCTG	61.147	GTTGAGGTTGTGCTGGAGTAGG	61.094	152
Kenaf-930	CL2093.Contig10_All_1429_2	AT(2*11)	GAGGTAGGCAAATTTGGATTCTG	61.147	GGTTGAGGTTGTGCTGGAGTAG	61.094	153
Kenaf-931	CL2093.Contig10_All_1429_3	AT(2*11)	TATGATCGTGGTGAAGAGAATGA	59.583	ATTTCCACTGCTTCCGATGTT	60.87	129
Kenaf-932	CL2093.Contig10_All_1429_4	AT(2*11)	TGATTATGATCGTGGTGAAGAGA	59.583	ATTTCCACTGCTTCCGATGTT	60.87	133
Kenaf-933	CL2093.Contig10_All_1429_5	AT(2*11)	GAGGTAGGCAAATTTGGATTCTG	61.147	GGTTGAGGTTGTGCTGGAGTA	60.164	153
Kenaf-934	CL2093.Contig12_All_1430_1	AT(2*11)	GTTGAGGTTGTGCTGGAGTAGG	61.094	GAGGTAGGCAAATTTGGATTCTG	61.147	152
Kenaf-935	CL2093.Contig12_All_1430_2	AT(2*11)	GGTTGAGGTTGTGCTGGAGTAG	61.094	GAGGTAGGCAAATTTGGATTCTG	61.147	153
Kenaf-936	CL2093.Contig12_All_1430_3	AT(2*11)	ATTTCCACTGCTTCCGATGTT	60.87	TATGATCGTGGTGAAGAGAATGA	59.583	129
Kenaf-937	CL2093.Contig12_All_1430_4	AT(2*11)	ATTTCCACTGCTTCCGATGTT	60.87	TGATTATGATCGTGGTGAAGAGA	59.583	133
Kenaf-938	CL2093.Contig12_All_1430_5	AT(2*11)	GGTTGAGGTTGTGCTGGAGTA	60.164	GAGGTAGGCAAATTTGGATTCTG	61.147	153
Kenaf-939	CL2093.Contig25_All_1433_1	AT(2*9)	GACTTGTCACTGACCCTCTCCTA	59.793	TGGATGGTTCCAAGGCTTATACT	61.044	150
Kenaf-940	CL2093.Contig25_All_1433_2	AT(2*9)	GACTTGTCACTGACCCTCTCCTA	59.793	TGGATGGTTCCAAGGCTTATAC	60.204	150
Kenaf-941	CL2093.Contig25_All_1433_3	AT(2*9)	GACTTGTCACTGACCCTCTCCTA	59.793	TTGGATGGTTCCAAGGCTTATAC	61.367	151
Kenaf-942	CL2093.Contig25_All_1433_4	AT(2*9)	GACTTGTCACTGACCCTCTCCTA	59.793	GGATGGTTCCAAGGCTTATACTA	58.6	149
Kenaf-943	CL2093.Contig25_All_1433_5	AT(2*9)	TGTCACTGACCCTCTCCTACTTT	59.306	TGGATGGTTCCAAGGCTTATACT	61.044	146
Kenaf-944	CL2096.Contig6_All_1434_1	TA(2*9)	GCAAAAGGCAAAAGAAAGAAACT	60.269	TGACATTTACACTCATCCCTTGA	59.485	157
Kenaf-945	CL2096.Contig6_All_1434_2	TA(2*9)	CTTTAAAACTCCAGGCAATGAAA	59.667	TGACATTTACACTCATCCCTTGA	59.485	136
Kenaf-946	CL20.Contig5_All_18_1	GAG(3*8)	ACCACCGATAACTTTGTCTGAAC	59.446	ACTTCTCCAAGCTCACCCATCT	61.537	130
Kenaf-947	CL20.Contig5_All_18_2	GAG(3*8)	ACCACCGATAACTTTGTCTGAAC	59.446	ACTTCTCCAAGCTCACCCATC	60.643	130
Kenaf-948	CL20.Contig5_All_18_3	GAG(3*8)	ACCACCGATAACTTTGTCTGAAC	59.446	GACTTCTCCAAGCTCACCCAT	60.643	131
Kenaf-949	CL20.Contig5_All_18_4	GAG(3*8)	ACCACCGATAACTTTGTCTGAAC	59.446	CTTCTCCAAGCTCACCCATCT	60.771	129
Kenaf-950	CL20.Contig5_All_18_5	GAG(3*8)	ACACCACCGATAACTTTGTCTGA	60.816	ACTTCTCCAAGCTCACCCATCT	61.537	132
Kenaf-951	CL2115.Contig2_All_1435_1	GAA(3*5)	ATTGTATAAAGGCCCCATCTTGT	59.988	TCACAGCAACCGTATAATTCTCA	59.661	157
Kenaf-952	CL2115.Contig2_All_1435_2	GAA(3*5)	ATTGTATAAAGGCCCCATCTTGT	59.988	TCCTCACAGCAACCGTATAATTC	60.377	160
Kenaf-953	CL2115.Contig2_All_1435_3	GAA(3*5)	GTATAAAGGCCCCATCTTGTCAT	60.438	TCACAGCAACCGTATAATTCTCA	59.661	154
Kenaf-954	CL2115.Contig2_All_1435_4	GAA(3*5)	GTATAAAGGCCCCATCTTGTCAT	60.438	TCCTCACAGCAACCGTATAATTC	60.377	157
Kenaf-955	CL2115.Contig2_All_1435_5	GAA(3*5)	GTATAAAGGCCCCATCTTGTCAT	60.438	GATTCCTCACAGCAACCGTATAA	60.377	160
Kenaf-956	CL2115.Contig2_All_1436_1	TTTC(4*5)	TCTCCACCTCTCGTACTGTTTTT	59.332	AACATATGCTGTGGGTGTTCTCT	59.942	149
Kenaf-957	CL2115.Contig2_All_1436_2	TTTC(4*5)	TTCTCCACCTCTCGTACTGTTTT	59.332	AACATATGCTGTGGGTGTTCTCT	59.942	150
Kenaf-958	CL2115.Contig2_All_1436_3	TTTC(4*5)	TCTCCACCTCTCGTACTGTTTTT	59.332	AAAAACATATGCTGTGGGTGTTC	60.163	152
Kenaf-959	CL2115.Contig2_All_1436_4	TTTC(4*5)	TTCTCCACCTCTCGTACTGTTTT	59.332	AAAAACATATGCTGTGGGTGTTC	60.163	153
Kenaf-960	CL2115.Contig2_All_1436_5	TTTC(4*5)	TCTCCACCTCTCGTACTGTTTTT	59.332	AAAACATATGCTGTGGGTGTTCT	59.818	151
Kenaf-961	CL2115.Contig2_All_1437_1	T(1*14)	TCTCCACCTCTCGTACTGTTTTT	59.332	AACATATGCTGTGGGTGTTCTCT	59.942	149
Kenaf-962	CL2115.Contig2_All_1437_2	T(1*14)	TTCTCCACCTCTCGTACTGTTTT	59.332	AACATATGCTGTGGGTGTTCTCT	59.942	150
Kenaf-963	CL2115.Contig2_All_1437_3	T(1*14)	TCTCCACCTCTCGTACTGTTTTT	59.332	AAAAACATATGCTGTGGGTGTTC	60.163	152
Kenaf-964	CL2115.Contig2_All_1437_4	T(1*14)	TTCTCCACCTCTCGTACTGTTTT	59.332	AAAAACATATGCTGTGGGTGTTC	60.163	153
Kenaf-965	CL2115.Contig2_All_1437_5	T(1*14)	TCTCCACCTCTCGTACTGTTTTT	59.332	AAAACATATGCTGTGGGTGTTCT	59.818	151
Kenaf-966	CL2115.Contig3_All_1438_1	CTT(3*5)	TCACAGCAACCGTATAATTCTCA	59.661	ATTGTATAAAGGCCCCATCTTGT	59.988	157
Kenaf-967	CL2115.Contig3_All_1438_2	CTT(3*5)	TCCTCACAGCAACCGTATAATTC	60.377	ATTGTATAAAGGCCCCATCTTGT	59.988	160
Kenaf-968	CL2115.Contig3_All_1438_3	CTT(3*5)	TCACAGCAACCGTATAATTCTCA	59.661	GTATAAAGGCCCCATCTTGTCAT	60.438	154
Kenaf-969	CL2115.Contig3_All_1438_4	CTT(3*5)	TCCTCACAGCAACCGTATAATTC	60.377	GTATAAAGGCCCCATCTTGTCAT	60.438	157
Kenaf-970	CL2115.Contig3_All_1438_5	CTT(3*5)	GATTCCTCACAGCAACCGTATAA	60.377	GTATAAAGGCCCCATCTTGTCAT	60.438	160
Kenaf-971	CL2119.Contig1_All_1440_1	GT(2*8)	ATGCTTCTTTCTCTCCATCTCCT	59.873	AACAAAGTGTCACCGGAAAATTA	59.801	128
Kenaf-972	CL2119.Contig1_All_1440_2	GT(2*8)	TGTTCCTTTTCTTCTAATCGGTG	59.654	TCAAAAGGTTATTTTCAGCGGTA	60.013	125
Kenaf-973	CL2119.Contig1_All_1440_3	GT(2*8)	AATGCTTCTTTCTCTCCATCTCC	60.216	AACAAAGTGTCACCGGAAAATTA	59.801	129
Kenaf-974	CL2119.Contig1_All_1440_4	GT(2*8)	TGTTCCTTTTCTTCTAATCGGTG	59.654	CCAAAGAAGCTCAAAATTCAAAA	59.77	142
Kenaf-975	CL2119.Contig1_All_1440_5	GT(2*8)	GCTTCTTTCTCTCCATCTCCTGT	60.383	AACAAAGTGTCACCGGAAAATTA	59.801	126
Kenaf-976	CL212.Contig2_All_240_1	GTT(3*5)	ATAAACAAATCCTTTGCTTGCAG	59.692	CAATCCATGCCTTACCTTCATT	60.204	140
Kenaf-977	CL212.Contig2_All_240_2	GTT(3*5)	ATAAACAAATCCTTTGCTTGCAG	59.692	AATCCATGCCTTACCTTCATTC	59.337	139
Kenaf-978	CL212.Contig2_All_240_3	GTT(3*5)	ATAAACAAATCCTTTGCTTGCAG	59.692	CAATCCATGCCTTACCTTCATTC	61.856	140
Kenaf-979	CL212.Contig2_All_240_4	GTT(3*5)	ACAAATCCTTTGCTTGCAGAAT	60.136	CAATCCATGCCTTACCTTCATT	60.204	136
Kenaf-980	CL212.Contig2_All_240_5	GTT(3*5)	TTCCCATAAACAAATCCTTTGC	60.181	CAATCCATGCCTTACCTTCATT	60.204	145
Kenaf-981	CL2172.Contig4_All_1449_1	CTTT(4*5)	CATAAACGAGGTCCATCACTTTC	59.885	CGAAAGCAAACTTTGAAAACTCA	60.762	127
Kenaf-982	CL2172.Contig4_All_1449_2	CTTT(4*5)	CATAAACGAGGTCCATCACTTTC	59.885	ACATCTCATGCATTCCAACAAG	60	150
Kenaf-983	CL2172.Contig4_All_1449_3	CTTT(4*5)	CATAAACGAGGTCCATCACTTTC	59.885	GCAAACTTTGAAAACTCAGACAGA	59.968	122
Kenaf-984	CL2172.Contig4_All_1449_4	CTTT(4*5)	GGCGTCCTAATTGATCTTACCTC	60.335	ACCAAACTCCTAGAAACCAACAA	59.098	110
Kenaf-985	CL2172.Contig4_All_1449_5	CTTT(4*5)	ATAAACGAGGTCCATCACTTTCC	60.584	CGAAAGCAAACTTTGAAAACTCA	60.762	126
Kenaf-986	CL2173.Contig2_All_1450_1	GA(2*6)	GGCTGTGAGATCATCTTTTGCTA	60.755	AACCTGATCAATCTCATGCTTGT	60.018	160
Kenaf-987	CL2173.Contig2_All_1450_2	GA(2*6)	TCATCTTTTGCTAATGCTTTGAA	59.057	ATCAACCTGATCAATCTCATGCT	59.982	153
Kenaf-988	CL2173.Contig2_All_1450_3	GA(2*6)	TCATCTTTTGCTAATGCTTTGAA	59.057	AACCTGATCAATCTCATGCTTGT	60.018	150
Kenaf-989	CL2173.Contig2_All_1450_4	GA(2*6)	TCATCTTTTGCTAATGCTTTGAA	59.057	TTCTCCATCAACCTGATCAATCT	59.954	159
Kenaf-990	CL2173.Contig2_All_1450_5	GA(2*6)	GATCATCTTTTGCTAATGCTTTGA	59.773	ATCAACCTGATCAATCTCATGCT	59.982	155
Kenaf-991	CL2173.Contig2_All_1451_1	GAGACC(6*4)	GAAGGGCTAAGGTAGGTTTGATG	60.357	GGCCAAAAATAAAAGGTTAGTGC	60.235	134
Kenaf-992	CL2173.Contig2_All_1451_2	GAGACC(6*4)	AGGGCTAAGGTAGGTTTGATGTT	59.473	GGCCAAAAATAAAAGGTTAGTGC	60.235	132
Kenaf-993	CL2173.Contig2_All_1451_3	GAGACC(6*4)	AAGGGCTAAGGTAGGTTTGATGT	59.473	GGCCAAAAATAAAAGGTTAGTGC	60.235	133
Kenaf-994	CL2173.Contig2_All_1451_4	GAGACC(6*4)	GAAGGGCTAAGGTAGGTTTGATG	60.357	TAATTCCATGATTGTAGGCCAAA	60.538	150
Kenaf-995	CL2173.Contig2_All_1451_5	GAGACC(6*4)	GAAGGGCTAAGGTAGGTTTGATG	60.357	TCTAATTCCATGATTGTAGGCCA	60.678	152
Kenaf-996	CL2173.Contig3_All_1452_1	TC(2*6)	AACCTGATCAATCTCATGCTTGT	60.018	GGCTGTGAGATCATCTTTTGCTA	60.755	160
Kenaf-997	CL2173.Contig3_All_1452_2	TC(2*6)	ATCAACCTGATCAATCTCATGCT	59.982	TCATCTTTTGCTAATGCTTTGAA	59.057	153
Kenaf-998	CL2173.Contig3_All_1452_3	TC(2*6)	AACCTGATCAATCTCATGCTTGT	60.018	TCATCTTTTGCTAATGCTTTGAA	59.057	150
Kenaf-999	CL2173.Contig3_All_1452_4	TC(2*6)	TTCTCCATCAACCTGATCAATCT	59.954	TCATCTTTTGCTAATGCTTTGAA	59.057	159
Kenaf-1000	CL2173.Contig3_All_1452_5	TC(2*6)	ATCAACCTGATCAATCTCATGCT	59.982	GATCATCTTTTGCTAATGCTTTGA	59.773	155
Kenaf-1001	CL2173.Contig3_All_1453_1	TC(2*6)	ATGGATTTTCTCCTTCACTCTCC	59.96	GTGAAGAAAGAACCCACACTTTG	60.061	98
Kenaf-1002	CL2173.Contig3_All_1453_2	TC(2*6)	ATGGATTTTCTCCTTCACTCTCC	59.96	AAAAGAAGCCGATAATACCAAGG	59.887	128
Kenaf-1003	CL2173.Contig3_All_1453_3	TC(2*6)	CTTCACTCTCCACGTTGTTTTCT	59.84	TGAAAAGAAGCCGATAATACCAA	59.98	118
Kenaf-1004	CL2173.Contig3_All_1453_4	TC(2*6)	CTTCACTCTCCACGTTGTTTTCT	59.84	AATGAGTGAAGAAAGAACCCACA	60.026	91
Kenaf-1005	CL2173.Contig3_All_1453_5	TC(2*6)	TCACTCTCCACGTTGTTTTCTTT	60.192	AAGAAGCCGATAATACCAAGGAG	60.001	112
Kenaf-1006	CL2185.Contig8_All_1464_1	AG(2*8)	GTTACAAGGCAGAGACTTTGTGG	60.212	TGAATCAACAAGACAAACTATATTCCA	60.167	107
Kenaf-1007	CL2185.Contig8_All_1464_2	AG(2*8)	TACAAGGCAGAGACTTTGTGGAG	60.826	TGAATCAACAAGACAAACTATATTCCA	60.167	105
Kenaf-1008	CL2185.Contig8_All_1464_3	AG(2*8)	CAGAGACTTTGTGGAGACGACTAA	59.979	TGAATCAACAAGACAAACTATATTCCA	60.167	98
Kenaf-1009	CL2185.Contig8_All_1464_4	AG(2*8)	AAGGCAGAGACTTTGTGGAGAC	59.923	TGAATCAACAAGACAAACTATATTCCA	60.167	102
Kenaf-1010	CL2185.Contig8_All_1464_5	AG(2*8)	GTTACAAGGCAGAGACTTTGTGG	60.212	GAATCAACAAGACAAACTATATTCCA	57.828	106
Kenaf-1011	CL218.Contig3_All_241_1	TG(2*6)	CATTTTCAAATACGAGCCGTTAG	60.032	CTTTCATCTTCTCTTCCTCGTCA	60.005	144
Kenaf-1012	CL218.Contig3_All_241_2	TG(2*6)	CATTTTCAAATACGAGCCGTTAG	60.032	TTTCAGGCTAAACAAGCTCAAAG	60.063	86
Kenaf-1013	CL218.Contig3_All_241_3	TG(2*6)	CATTTTCAAATACGAGCCGTTAG	60.032	AACAAGAGCTCTCCTCCTTTCAT	59.908	160
Kenaf-1014	CL218.Contig3_All_241_4	TG(2*6)	CATTTTCAAATACGAGCCGTTAG	60.032	CCTCCTTTCATCTTCTCTTCCTC	59.846	148
Kenaf-1015	CL218.Contig3_All_241_5	TG(2*6)	CATTTTCAAATACGAGCCGTTAG	60.032	TCCTCCTTTCATCTTCTCTTCCT	59.846	149
Kenaf-1016	CL2202.Contig3_All_1469_1	TC(2*7)	CACCTAATAGATATCAGTTGGCTTTT	58.391	AGGGTCATCCCCGTAATAAACT	59.971	160
Kenaf-1017	CL2202.Contig3_All_1469_2	TC(2*7)	CACCTAATAGATATCAGTTGGCTTTT	58.391	AGGGTCATCCCCGTAATAAACTT	61.102	160
Kenaf-1018	CL2202.Contig3_All_1469_3	TC(2*7)	CACCTAATAGATATCAGTTGGCTTT	57.209	AGGGTCATCCCCGTAATAAACT	59.971	160
Kenaf-1019	CL2202.Contig3_All_1469_4	TC(2*7)	CACCTAATAGATATCAGTTGGCTTT	57.209	AGGGTCATCCCCGTAATAAACTT	61.102	160
Kenaf-1020	CL2202.Contig3_All_1469_5	TC(2*7)	CACCTAATAGATATCAGTTGGCTTTT	58.391	GGGTCATCCCCGTAATAAACTT	60.303	159
Kenaf-1021	CL2207.Contig2_All_1475_1	CT(2*10)	CGGATTTGGTATTGAAAAGAATG	59.735	CATTTAAGGCTGTGAAAAGGAGA	59.78	140
Kenaf-1022	CL2207.Contig2_All_1475_2	CT(2*10)	TACCTCGGATTTGGTATTGAAAA	59.735	CATTTAAGGCTGTGAAAAGGAGA	59.78	145
Kenaf-1023	CL2207.Contig2_All_1475_3	CT(2*10)	TTACCTCGGATTTGGTATTGAAA	59.735	CATTTAAGGCTGTGAAAAGGAGA	59.78	146
Kenaf-1024	CL2207.Contig2_All_1475_4	CT(2*10)	TTTACCTCGGATTTGGTATTGAA	59.735	CATTTAAGGCTGTGAAAAGGAGA	59.78	147
Kenaf-1025	CL2207.Contig2_All_1475_5	CT(2*10)	TTTTACCTCGGATTTGGTATTGA	59.735	CATTTAAGGCTGTGAAAAGGAGA	59.78	148
Kenaf-1026	CL2207.Contig3_All_1476_1	AG(2*10)	CATTTAAGGCTGTGAAAAGGAGA	59.78	CGGATTTGGTATTGAAAAGAATG	59.735	140
Kenaf-1027	CL2207.Contig3_All_1476_2	AG(2*10)	CATTTAAGGCTGTGAAAAGGAGA	59.78	TACCTCGGATTTGGTATTGAAAA	59.735	145
Kenaf-1028	CL2207.Contig3_All_1476_3	AG(2*10)	CATTTAAGGCTGTGAAAAGGAGA	59.78	TTACCTCGGATTTGGTATTGAAA	59.735	146
Kenaf-1029	CL2207.Contig3_All_1476_4	AG(2*10)	CATTTAAGGCTGTGAAAAGGAGA	59.78	TTTACCTCGGATTTGGTATTGAA	59.735	147
Kenaf-1030	CL2207.Contig3_All_1476_5	AG(2*10)	CATTTAAGGCTGTGAAAAGGAGA	59.78	TTTTACCTCGGATTTGGTATTGA	59.735	148
Kenaf-1031	CL2209.Contig1_All_1477_1	AAG(3*7)	CAAGGAAGGCATAGTGGATAAGA	59.638	TAATCACTATCACTGCTGCTGCT	59.217	159
Kenaf-1032	CL2209.Contig1_All_1477_2	AAG(3*7)	TAAGATCAAGGACAAGATCCACG	60.489	TAATCACTATCACTGCTGCTGCT	59.217	141
Kenaf-1033	CL2209.Contig1_All_1477_3	AAG(3*7)	GGCATAGTGGATAAGATCAAGGA	59.476	TAATCACTATCACTGCTGCTGCT	59.217	152
Kenaf-1034	CL2209.Contig1_All_1477_4	AAG(3*7)	GGAAGGCATAGTGGATAAGATCA	59.476	TAATCACTATCACTGCTGCTGCT	59.217	156
Kenaf-1035	CL2209.Contig1_All_1477_5	AAG(3*7)	CAAGGAAGGCATAGTGGATAAGA	59.638	CTAATCACTATCACTGCTGCTGCT	60.122	160
Kenaf-1036	CL2236.Contig1_All_1490_1	GAAGAG(6*4)	AATAAAGAAATTGTTGTGCCGAA	59.898	AACCGGGAATACATCAGGACTTA	60.924	117
Kenaf-1037	CL2236.Contig1_All_1490_2	GAAGAG(6*4)	ATTATAAGAAGGCAAAAGCTGCC	60.126	AACCGGGAATACATCAGGACTTA	60.924	155
Kenaf-1038	CL2236.Contig1_All_1490_3	GAAGAG(6*4)	AATAAAGAAATTGTTGTGCCGAA	59.898	CGGGAATACATCAGGACTTAAAC	58.941	114
Kenaf-1039	CL2236.Contig1_All_1490_4	GAAGAG(6*4)	ATTATAAGAAGGCAAAAGCTGCC	60.126	CGGGAATACATCAGGACTTAAAC	58.941	152
Kenaf-1040	CL2236.Contig1_All_1490_5	GAAGAG(6*4)	AATAAAGAAATTGTTGTGCCGAA	59.898	ATCTGACCGTCTTGGAACAAAT	59.87	149
Kenaf-1041	CL2236.Contig1_All_1491_1	TCT(3*5)	TTTGAAGCTTCGATGTAATAGCG	60.723	TTTCTTCTCGGATTTTACAGACG	59.78	112
Kenaf-1042	CL2236.Contig1_All_1491_2	TCT(3*5)	TTTGAAGCTTCGATGTAATAGCG	60.723	TCTTCTCGGATTTTACAGACGAC	59.776	110
Kenaf-1043	CL2236.Contig1_All_1491_3	TCT(3*5)	TGAAGCTTCGATGTAATAGCGAC	60.752	TTTCTTCTCGGATTTTACAGACG	59.78	110
Kenaf-1044	CL2236.Contig1_All_1491_4	TCT(3*5)	TGAAGCTTCGATGTAATAGCGAC	60.752	TCTTCTCGGATTTTACAGACGAC	59.776	108
Kenaf-1045	CL2236.Contig1_All_1491_5	TCT(3*5)	TTTGAAGCTTCGATGTAATAGCG	60.723	TGTTTTCAATGTCGCTTTCTTCT	60.282	127
Kenaf-1046	CL2236.Contig3_All_1494_1	CTCTTC(6*4)	AACCGGGAATACATCAGGACTTA	60.924	GAACAAGACGAGCAAGTTGAAGT	59.978	156
Kenaf-1047	CL2236.Contig3_All_1494_3	CTCTTC(6*4)	AACCGGGAATACATCAGGACTTA	60.924	AGAACAAGACGAGCAAGTTGAAG	60.102	157
Kenaf-1048	CL2236.Contig3_All_1494_4	CTCTTC(6*4)	AACCGGGAATACATCAGGACTTA	60.924	TCTATTGAAAAGCCAACAAAGGA	60.115	105
Kenaf-1049	CL2236.Contig3_All_1494_5	CTCTTC(6*4)	CGGGAATACATCAGGACTTAAAC	58.941	GAACAAGAACAAGACGAGCAAGT	59.978	159
Kenaf-1050	CL2244.Contig1_All_1497_1	AGA(3*7)	AAAGTGTTGGTGAAGCAAAGAAG	59.848	TGAAACCCATTTAAACCAACAAA	60.456	128
Kenaf-1051	CL2244.Contig1_All_1497_2	AGA(3*7)	AAAGTGTTGGTGAAGCAAAGAAG	59.848	TTGAAACCCATTTAAACCAACAA	60.456	129
Kenaf-1052	CL2244.Contig1_All_1497_3	AGA(3*7)	AAAGTGTTGGTGAAGCAAAGAAG	59.848	TTTGAAACCCATTTAAACCAACA	60.456	130
Kenaf-1053	CL2244.Contig1_All_1497_4	AGA(3*7)	AAAGTGTTGGTGAAGCAAAGAAG	59.848	TTTTGAAACCCATTTAAACCAAC	59.2	131
Kenaf-1054	CL2244.Contig1_All_1497_5	AGA(3*7)	GAAAGTGTTGGTGAAGCAAAGAA	60.666	TGAAACCCATTTAAACCAACAAA	60.456	129
Kenaf-1055	CL2261.Contig1_All_1500_1	GGC(3*5)	TGGGTTCGAATTCACATAGAACT	59.885	CCTCTCACTTCCTCAAACTTCAA	59.908	82
Kenaf-1056	CL2261.Contig1_All_1500_2	GGC(3*5)	AACTTTGGGTTCGAATTCACATA	59.765	CCTCTCACTTCCTCAAACTTCAA	59.908	87
Kenaf-1057	CL2261.Contig1_All_1500_3	GGC(3*5)	CTTTGGGTTCGAATTCACATAGA	60.35	CCTCTCACTTCCTCAAACTTCAA	59.908	85
Kenaf-1058	CL2261.Contig1_All_1500_4	GGC(3*5)	TGGGTTCGAATTCACATAGAACT	59.885	TAAACTCCACCATCACTCTTTGC	60.528	134
Kenaf-1059	CL2261.Contig1_All_1500_5	GGC(3*5)	TGGGTTCGAATTCACATAGAACT	59.885	TGAAGCTTAAACTCCACCATCAC	60.528	141
Kenaf-1060	CL2261.Contig2_All_1501_1	GCC(3*5)	CCTCTCACTTCCTCAAACTTCAA	59.908	TGGGTTCGAATTCACATAGAACT	59.885	82
Kenaf-1061	CL2261.Contig2_All_1501_2	GCC(3*5)	CCTCTCACTTCCTCAAACTTCAA	59.908	AACTTTGGGTTCGAATTCACATA	59.765	87
Kenaf-1062	CL2261.Contig2_All_1501_3	GCC(3*5)	CCTCTCACTTCCTCAAACTTCAA	59.908	CTTTGGGTTCGAATTCACATAGA	60.35	85
Kenaf-1063	CL2261.Contig2_All_1501_4	GCC(3*5)	TAAACTCCACCATCACTCTTTGC	60.528	TGGGTTCGAATTCACATAGAACT	59.885	134
Kenaf-1064	CL2261.Contig2_All_1501_5	GCC(3*5)	TGAAGCTTAAACTCCACCATCAC	60.528	TGGGTTCGAATTCACATAGAACT	59.885	141
Kenaf-1065	CL2269.Contig10_All_1506_1	AC(2*7)	TCACTCAATCTCACACAGGGATA	59.607	AGAGAATTGCAGTGAGTTGAAGC	60.075	160
Kenaf-1066	CL2269.Contig10_All_1506_2	AC(2*7)	TTTGTCACTCAATCTCACACAGG	60.2	GAAGGACCAGAAGGATAAGGATG	60.315	131
Kenaf-1067	CL2269.Contig10_All_1506_3	AC(2*7)	ACAGTCCCATTTGTCACTCAATC	60.282	GAAGGACCAGAAGGATAAGGATG	60.315	140
Kenaf-1068	CL2269.Contig10_All_1506_4	AC(2*7)	TTTGTCACTCAATCTCACACAGG	60.2	AAAAGGAAGGACCAGAAGGATAA	59.515	136
Kenaf-1069	CL2269.Contig10_All_1506_5	AC(2*7)	TTTGTCACTCAATCTCACACAGG	60.2	AAAAAGGAAGGACCAGAAGGATA	59.515	137
Kenaf-1070	CL2271.Contig1_All_1507_1	GAA(3*6)	CTACTACAGGTACGGATATGGCG	59.946	TCAATTATATGCAACTCAGCAGC	59.424	127
Kenaf-1071	CL2271.Contig1_All_1507_2	GAA(3*6)	CGGCTACTACAGGTACGGATATG	59.946	TCAATTATATGCAACTCAGCAGC	59.424	130
Kenaf-1072	CL2271.Contig1_All_1507_3	GAA(3*6)	TTTAGTGATGAAAACCCACAAGG	60.255	TCAATTATATGCAACTCAGCAGC	59.424	84
Kenaf-1073	CL2271.Contig1_All_1507_4	GAA(3*6)	GCACCGGTGAATATTTTAGTGAT	59.306	TCAATTATATGCAACTCAGCAGC	59.424	98
Kenaf-1074	CL2271.Contig1_All_1507_5	GAA(3*6)	GCTACTACAGGTACGGATATGGC	59.116	TCAATTATATGCAACTCAGCAGC	59.424	128
Kenaf-1075	CL2276.Contig2_All_1508_1	CTT(3*5)	AAAGCAGTGATTTCGATTTTCAA	60.121	CTGAGAGCTCTGGTTATGGAAGA	60.026	135
Kenaf-1076	CL2276.Contig2_All_1508_2	CTT(3*5)	AAAAGCAGTGATTTCGATTTTCA	60.121	CTGAGAGCTCTGGTTATGGAAGA	60.026	136
Kenaf-1077	CL2276.Contig2_All_1508_3	CTT(3*5)	TGATTTCGATTTTCAATCAAGGT	59.836	CTGAGAGCTCTGGTTATGGAAGA	60.026	128
Kenaf-1078	CL2276.Contig2_All_1508_4	CTT(3*5)	GTGATTTCGATTTTCAATCAAGG	59.836	CTGAGAGCTCTGGTTATGGAAGA	60.026	129
Kenaf-1079	CL2276.Contig2_All_1508_5	CTT(3*5)	ACAAAAGAAAAGCAGTGATTTCG	59.821	CTGAGAGCTCTGGTTATGGAAGA	60.026	143
Kenaf-1080	CL2277.Contig1_All_1510_2	GGT(3*5)	GTTTCAGAAAGAAGAACCCGTTT	60.031	ATCTTCTTCCGAACTCTTCTCCA	60.718	154
Kenaf-1081	CL2277.Contig1_All_1510_3	GGT(3*5)	GTTTCAGAAAGAAGAACCCGTTT	60.031	TGATCTTCTTCCGAACTCTTCTC	59.114	156
Kenaf-1082	CL2277.Contig1_All_1510_4	GGT(3*5)	GTTTCAGAAAGAAGAACCCGTTT	60.031	CTGATCTTCTTCCGAACTCTTCTC	60.022	157
Kenaf-1083	CL2277.Contig6_All_1511_1	GTG(3*5)	GAATAAGACCCGAATCAGAAACG	61.147	TGATCTTCTTCCAAACTCTGCTC	60.012	98
Kenaf-1084	CL2277.Contig6_All_1511_2	GTG(3*5)	CGAATAAGACCCGAATCAGAAAC	61.147	TGATCTTCTTCCAAACTCTGCTC	60.012	99
Kenaf-1085	CL2306.Contig7_All_1519_1	CT(2*6)	GATGAACTTCCACCACTCTTCAG	60.16	AGAATCATGAAGAAGACGAGCAG	60.033	154
Kenaf-1086	CL2306.Contig7_All_1519_2	CT(2*6)	GATGAACTTCCACCACTCTTCAG	60.16	GAGTCCTTTGAAGGAGAAGAAGG	59.882	114
Kenaf-1087	CL2306.Contig7_All_1519_3	CT(2*6)	GATGAACTTCCACCACTCTTCAG	60.16	AGAAGAAGGGCGTAGTTTCAAGT	59.844	100
Kenaf-1088	CL2306.Contig7_All_1519_4	CT(2*6)	ATTGATGAAGACGATGAACTTCC	59.478	GAGTCCTTTGAAGGAGAAGAAGG	59.882	126
Kenaf-1089	CL2306.Contig7_All_1519_5	CT(2*6)	ATTGATGAAGACGATGAACTTCC	59.478	AGAAGAAGGGCGTAGTTTCAAGT	59.844	112
Kenaf-1090	CL2318.Contig1_All_1521_1	CCCATG(6*4)	AAAGAGGAGCTAAAGGTGCAGAT	59.934	GATGGAAAGGGACAAAGACTACA	59.513	151
Kenaf-1091	CL2318.Contig1_All_1521_2	CCCATG(6*4)	AGGGAGAAAGAGGAGCTAAAGGT	60.253	GATGGAAAGGGACAAAGACTACA	59.513	157
Kenaf-1092	CL2318.Contig1_All_1521_3	CCCATG(6*4)	CTAAAGGTGCAGATTGAGACAGC	60.438	GATGGAAAGGGACAAAGACTACA	59.513	142
Kenaf-1093	CL2318.Contig1_All_1521_4	CCCATG(6*4)	GCTAAAGGTGCAGATTGAGACAG	60.438	GATGGAAAGGGACAAAGACTACA	59.513	143
Kenaf-1094	CL2318.Contig1_All_1521_5	CCCATG(6*4)	AGCTAAAGGTGCAGATTGAGACA	60.438	GATGGAAAGGGACAAAGACTACA	59.513	144
Kenaf-1095	CL2318.Contig2_All_1522_1	CCCATG(6*4)	AGAGTCCAAGGAGCATGTGATT	60.139	ATGGACACACTAAGCTTGCATTT	60.075	135
Kenaf-1096	CL2318.Contig2_All_1522_2	CCCATG(6*4)	AGAGTCCAAGGAGCATGTGATT	60.139	TGGACACACTAAGCTTGCATTTA	59.829	134
Kenaf-1097	CL2318.Contig2_All_1522_3	CCCATG(6*4)	AGAGTCCAAGGAGCATGTGATT	60.139	AGATGGACACACTAAGCTTGCAT	60.206	137
Kenaf-1098	CL2318.Contig2_All_1522_4	CCCATG(6*4)	AGAGTCCAAGGAGCATGTGATTT	61.379	ATGGACACACTAAGCTTGCATTT	60.075	135
Kenaf-1099	CL2318.Contig2_All_1522_5	CCCATG(6*4)	AGAGTCCAAGGAGCATGTGATTT	61.379	TGGACACACTAAGCTTGCATTTA	59.829	134
Kenaf-1100	CL2318.Contig3_All_1523_1	GGGCAT(6*4)	ACACGGACACTGCCACAAC	60.655	AAAGAGGAGCTAAAGGTGCAGAT	59.934	149
Kenaf-1101	CL2318.Contig3_All_1523_2	GGGCAT(6*4)	ACACGGACACTGCCACAAC	60.655	ATGAAAGGGAGAAAGAGGAGCTA	59.874	160
Kenaf-1102	CL2318.Contig3_All_1523_3	GGGCAT(6*4)	ACACGGACACTGCCACAAC	60.655	AGGGAGAAAGAGGAGCTAAAGGT	60.253	155
Kenaf-1103	CL2318.Contig3_All_1523_4	GGGCAT(6*4)	ACACGGACACTGCCACAAC	60.655	CTAAAGGTGCAGATTGAGACAGC	60.438	140
Kenaf-1104	CL2318.Contig3_All_1523_5	GGGCAT(6*4)	ACACGGACACTGCCACAAC	60.655	AGCTAAAGGTGCAGATTGAGACA	60.438	142
Kenaf-1105	CL2321.Contig3_All_1524_1	TGT(3*8)	GAGACAGTGGAGCTCTGAAACAT	59.937	GAGAAGGAACAGACATTTGCAGT	59.809	123
Kenaf-1106	CL2321.Contig3_All_1524_2	TGT(3*8)	CATGAAACTACGAGTTTGAGGCT	59.833	GAGAAGGAACAGACATTTGCAGT	59.809	103
Kenaf-1107	CL2321.Contig3_All_1524_3	TGT(3*8)	GTGGAGCTCTGAAACATGAAACT	59.809	GAGAAGGAACAGACATTTGCAGT	59.809	117
Kenaf-1108	CL2321.Contig3_All_1524_4	TGT(3*8)	AGTGGAGCTCTGAAACATGAAAC	59.809	GAGAAGGAACAGACATTTGCAGT	59.809	118
Kenaf-1109	CL2321.Contig3_All_1524_5	TGT(3*8)	GAGACAGTGGAGCTCTGAAACAT	59.937	ATCTGGGAGAAGGAACAGACATT	60.363	129
Kenaf-1110	CL2332.Contig15_All_1530_1	ATCTG(5*4)	CTCGAGACTGCTGAAACGAAT	59.63	GACCATATATTGGGCATTGAAAA	59.934	160
Kenaf-1111	CL2332.Contig15_All_1530_2	ATCTG(5*4)	AGACTGCTGAAACGAATCACG	60.447	GAGACCATATATTGGGCATTGAA	60.055	158
Kenaf-1112	CL2332.Contig15_All_1530_3	ATCTG(5*4)	CTCGAGACTGCTGAAACGAATC	61.444	GACCATATATTGGGCATTGAAAA	59.934	160
Kenaf-1113	CL2332.Contig15_All_1530_4	ATCTG(5*4)	AGACTGCTGAAACGAATCACG	60.447	GACCATATATTGGGCATTGAAAA	59.934	156
Kenaf-1114	CL2332.Contig15_All_1530_5	ATCTG(5*4)	CTCGAGACTGCTGAAACGAAT	59.63	GTAGTGCGATAAAAGAAAAGCCA	59.815	122
Kenaf-1115	CL2335.Contig1_All_1532_1	CAA(3*6)	TACAGCAAAATCAAAACCAAAGC	60.501	GTATTCAAATCATCGGACACCAT	59.965	103
Kenaf-1116	CL2335.Contig1_All_1532_2	CAA(3*6)	TACAGCAAAATCAAAACCAAAGC	60.501	ATTCAAATCATCGGACACCATAG	60.089	101
Kenaf-1117	CL2335.Contig1_All_1532_3	CAA(3*6)	CAGCAAAATCAAAACCAAAGCTA	60.613	GTATTCAAATCATCGGACACCAT	59.965	101
Kenaf-1118	CL2335.Contig1_All_1532_4	CAA(3*6)	TACAGCAAAATCAAAACCAAAGC	60.501	GGACACCATAGACAGAAAAGCAG	60.178	89
Kenaf-1119	CL2335.Contig1_All_1532_5	CAA(3*6)	CAGCAAAATCAAAACCAAAGCTA	60.613	ATTCAAATCATCGGACACCATAG	60.089	99
Kenaf-1120	CL2335.Contig3_All_1533_1	TTG(3*6)	GTATTCAAATCATCGGACACCAT	59.965	TACAGCAAAATCAAAACCAAAGC	60.501	103
Kenaf-1121	CL2335.Contig3_All_1533_2	TTG(3*6)	ATTCAAATCATCGGACACCATAG	60.089	TACAGCAAAATCAAAACCAAAGC	60.501	101
Kenaf-1122	CL2335.Contig3_All_1533_3	TTG(3*6)	GTATTCAAATCATCGGACACCAT	59.965	CAGCAAAATCAAAACCAAAGCTA	60.613	101
Kenaf-1123	CL2335.Contig3_All_1533_4	TTG(3*6)	GGACACCATAGACAGAAAAGCAG	60.178	TACAGCAAAATCAAAACCAAAGC	60.501	89
Kenaf-1124	CL2335.Contig3_All_1533_5	TTG(3*6)	ATTCAAATCATCGGACACCATAG	60.089	CAGCAAAATCAAAACCAAAGCTA	60.613	99
Kenaf-1125	CL2337.Contig3_All_1536_4	TC(2*6)	AAGCCTGAAAATGAGATAGACCC	59.984	CATTTCAAAAGAATCCCCAGATA	59.344	127
Kenaf-1126	CL2337.Contig3_All_1536_5	TC(2*6)	GTTTCGAGCTTTTGATTGTATGG	60.017	CATTTCAAAAGAATCCCCAGATA	59.344	160
Kenaf-1127	CL2337.Contig4_All_1537_1	GA(2*6)	ATTTTCCCCTTGTTTCTCTGTTT	59.432	AAGCCTGAAAATGAGATAGACCC	59.984	86
Kenaf-1128	CL2337.Contig4_All_1537_2	GA(2*6)	ATTTTCCCCTTGTTTCTCTGTTT	59.432	GTTTCGAGCTTTTGATTGTATGG	60.017	119
Kenaf-1129	CL2337.Contig4_All_1537_3	GA(2*6)	ATTTTCCCCTTGTTTCTCTGTTT	59.432	GGTTTCGAGCTTTTGATTGTATG	60.017	120
Kenaf-1130	CL2344.Contig3_All_1541_1	A(1*14)	TAGACTGAACTTCCCTTCCCTTC	60.115	GAACCACGGTTTGATGAGAACTA	60.399	123
Kenaf-1131	CL2344.Contig3_All_1541_2	A(1*14)	TCTAGACTGAACTTCCCTTCCCT	59.774	GAACCACGGTTTGATGAGAACTA	60.399	125
Kenaf-1132	CL2344.Contig3_All_1541_3	A(1*14)	TAGACTGAACTTCCCTTCCCTTC	60.115	AACCACGGTTTGATGAGAACTAC	59.446	122
Kenaf-1133	CL2344.Contig3_All_1541_4	A(1*14)	TCTAGACTGAACTTCCCTTCCCT	59.774	AACCACGGTTTGATGAGAACTAC	59.446	124
Kenaf-1134	CL2344.Contig3_All_1541_5	A(1*14)	TAGACTGAACTTCCCTTCCCTTC	60.115	ACCACGGTTTGATGAGAACTACT	59.091	121
Kenaf-1135	CL2358.Contig2_All_1543_1	GAA(3*6)	GTAGATCGGCGAAGATAAGTCAG	59.428	AGTTTGATATTCAAAGGACCGCT	60.365	136
Kenaf-1136	CL2358.Contig2_All_1543_3	GAA(3*6)	GTAGATCGGCGAAGATAAGTCAG	59.428	GGGGAAGTTTGATATTCAAAGGA	60.514	141
Kenaf-1137	CL2360.Contig1_All_1544_1	TTCAGC(6*4)	ACTCAAAAAGCATATCCCAAGGT	60.243	GCGGAGATGATGATGAAGAAGTA	60.596	107
Kenaf-1138	CL2360.Contig1_All_1544_2	TTCAGC(6*4)	CGTATCCAGAACTCAAAAAGCAT	59.68	GCGGAGATGATGATGAAGAAGTA	60.596	117
Kenaf-1139	CL2360.Contig1_All_1544_3	TTCAGC(6*4)	CAGAACTCAAAAAGCATATCCCA	60.476	GCGGAGATGATGATGAAGAAGTA	60.596	111
Kenaf-1140	CL2360.Contig1_All_1544_4	TTCAGC(6*4)	GTCGTATCCAGAACTCAAAAAGC	59.321	GCGGAGATGATGATGAAGAAGTA	60.596	119
Kenaf-1141	CL2360.Contig1_All_1544_5	TTCAGC(6*4)	AAAAGCATATCCCAAGGTTTCAG	60.68	GCGGAGATGATGATGAAGAAGTA	60.596	102
Kenaf-1142	CL2360.Contig2_All_1545_1	TTCAGC(6*4)	TAAAGCAGGAGTGAGGAATTTTG	59.78	GCGGAGATGATGATGAAGAAGTA	60.596	139
Kenaf-1143	CL2360.Contig2_All_1545_2	TTCAGC(6*4)	CAAATTTAAAGCAGGAGTGAGGA	59.78	GCGGAGATGATGATGAAGAAGTA	60.596	145
Kenaf-1144	CL2360.Contig2_All_1545_3	TTCAGC(6*4)	TCAAATTTAAAGCAGGAGTGAGG	59.78	GCGGAGATGATGATGAAGAAGTA	60.596	146
Kenaf-1145	CL2360.Contig2_All_1545_4	TTCAGC(6*4)	AAAGCAGGAGTGAGGAATTTTGT	60.509	GCGGAGATGATGATGAAGAAGTA	60.596	138
Kenaf-1146	CL2360.Contig2_All_1545_5	TTCAGC(6*4)	AGCAGGAGTGAGGAATTTTGTAA	59.317	GCGGAGATGATGATGAAGAAGTA	60.596	136
Kenaf-1147	CL2366.Contig2_All_1546_1	CTC(3*6)	AACGACTTGGTGTCGATCATACT	59.942	GCAGTCCATGAAAGATGAAGAAG	60.256	102
Kenaf-1148	CL2366.Contig2_All_1546_3	CTC(3*6)	TCGAGGAAGAATAAAACGACTTG	59.78	GCAGTCCATGAAAGATGAAGAAG	60.256	116
Kenaf-1149	CL2366.Contig2_All_1546_4	CTC(3*6)	TCGTAGGAGTATTTGCATAGGGA	59.997	CCATGAAAGATGAAGAAGAGAGC	59.496	156
Kenaf-1150	CL2369.Contig5_All_1548_1	GA(2*12)	TAAAGCAAAGGGTTCATTTTTCA	59.994	TATTTGTCTTCCCCAAAACTTCA	59.865	114
Kenaf-1151	CL2369.Contig5_All_1548_2	GA(2*12)	TAAAGCAAAGGGTTCATTTTTCA	59.994	CAGAAACATATTTGTCTTCCCCA	60.223	122
Kenaf-1152	CL2369.Contig5_All_1548_3	GA(2*12)	TTGAGATTAAAGCAAAGGGTTCA	60.115	TATTTGTCTTCCCCAAAACTTCA	59.865	121
Kenaf-1153	CL2369.Contig5_All_1548_4	GA(2*12)	TTGAGATTAAAGCAAAGGGTTCA	60.115	CAGAAACATATTTGTCTTCCCCA	60.223	129
Kenaf-1154	CL2369.Contig5_All_1548_5	GA(2*12)	AAGCAAAGGGTTCATTTTTCAAT	60.22	TATTTGTCTTCCCCAAAACTTCA	59.865	112
Kenaf-1155	CL2369.Contig6_All_1549_1	TC(2*12)	TATTTGTCTTCCCCAAAACTTCA	59.865	ATTATAAAGCTATCCCCTTCCCC	59.928	128
Kenaf-1156	CL2369.Contig6_All_1549_2	TC(2*12)	CAGAAACATATTTGTCTTCCCCA	60.223	ATTATAAAGCTATCCCCTTCCCC	59.928	136
Kenaf-1157	CL2369.Contig6_All_1549_3	TC(2*12)	ATTTGTCTTCCCCAAAACTTCAG	60.708	GACTTTGGTGGAGAATTGAGATG	59.99	160
Kenaf-1158	CL2369.Contig6_All_1549_4	TC(2*12)	ATTTGTCTTCCCCAAAACTTCAG	60.708	ATTATAAAGCTATCCCCTTCCCC	59.928	127
Kenaf-1159	CL2369.Contig6_All_1549_5	TC(2*12)	TATTTGTCTTCCCCAAAACTTCA	59.865	GGAGAATTGAGATGGCGTTTTAT	60.661	152
Kenaf-1160	CL2369.Contig6_All_1550_1	TTCCT(5*4)	CATCTCAATTCTCCACCAAAGTC	59.99	CAGATGAATGTGGACAGACAAAA	60.023	126
Kenaf-1161	CL2369.Contig6_All_1550_2	TTCCT(5*4)	CATCTCAATTCTCCACCAAAGTC	59.99	GACAGATGAATGTGGACAGACAA	60.028	128
Kenaf-1162	CL2369.Contig6_All_1550_3	TTCCT(5*4)	CATCTCAATTCTCCACCAAAGTC	59.99	TGTGGACAGACAAAAGTCTTGAA	59.805	118
Kenaf-1163	CL2369.Contig6_All_1550_4	TTCCT(5*4)	TCTCAATTCTCCACCAAAGTCTC	59.743	CAGATGAATGTGGACAGACAAAA	60.023	124
Kenaf-1164	CL2369.Contig6_All_1550_5	TTCCT(5*4)	TCTCAATTCTCCACCAAAGTCTC	59.743	GACAGATGAATGTGGACAGACAA	60.028	126
Kenaf-1165	CL2369.Contig6_All_1553_1	AAGGA(5*4)	CAGATGAATGTGGACAGACAAAA	60.023	CATCTCAATTCTCCACCAAAGTC	59.99	126
Kenaf-1166	CL2369.Contig6_All_1553_2	AAGGA(5*4)	GACAGATGAATGTGGACAGACAA	60.028	CATCTCAATTCTCCACCAAAGTC	59.99	128
Kenaf-1167	CL2369.Contig6_All_1553_3	AAGGA(5*4)	TGTGGACAGACAAAAGTCTTGAA	59.805	CATCTCAATTCTCCACCAAAGTC	59.99	118
Kenaf-1168	CL2369.Contig6_All_1553_4	AAGGA(5*4)	CAGATGAATGTGGACAGACAAAA	60.023	TCTCAATTCTCCACCAAAGTCTC	59.743	124
Kenaf-1169	CL2369.Contig6_All_1553_5	AAGGA(5*4)	GACAGATGAATGTGGACAGACAA	60.028	TCTCAATTCTCCACCAAAGTCTC	59.743	126
Kenaf-1170	CL2369.Contig6_All_1554_1	GA(2*12)	ATTATAAAGCTATCCCCTTCCCC	59.928	GGCAGAAGACAAAAATCGAAATA	59.637	129
Kenaf-1171	CL2369.Contig6_All_1554_2	GA(2*12)	ATTATAAAGCTATCCCCTTCCCC	59.928	AGGCAGAAGACAAAAATCGAAAT	60.467	130
Kenaf-1172	CL2369.Contig6_All_1554_3	GA(2*12)	GGAGAATTGAGATGGCGTTTTAT	60.661	GGCAGAAGACAAAAATCGAAATA	59.637	153
Kenaf-1173	CL2369.Contig6_All_1554_4	GA(2*12)	TGCTTTGCTTTCTCTGGCTACTA	60.667	GGCAGAAGACAAAAATCGAAATA	59.637	99
Kenaf-1174	CL2369.Contig6_All_1554_5	GA(2*12)	ATTATAAAGCTATCCCCTTCCCC	59.928	AGTTGAGGCAGAAGACAAAAATC	58.95	135
Kenaf-1175	CL238.Contig2_All_243_1	TCT(3*5)	CACCTTTCTTCAAAGAAGACGAC	59.442	ACCCTAACCCTAACGTGAAAGTC	59.824	114
Kenaf-1176	CL238.Contig2_All_243_2	TCT(3*5)	CACCTTTCTTCAAAGAAGACGAC	59.442	AGAAAACGACAACCCTAACCCTA	60.267	131
Kenaf-1177	CL238.Contig2_All_243_3	TCT(3*5)	CACCTTTCTTCAAAGAAGACGAC	59.442	AAAACGACAACCCTAACCCTAAC	59.712	129
Kenaf-1178	CL238.Contig2_All_243_4	TCT(3*5)	CACCTTTCTTCAAAGAAGACGAC	59.442	GACAACCCTAACCCTAACCCTAA	59.672	124
Kenaf-1179	CL238.Contig2_All_243_5	TCT(3*5)	CACCTTTCTTCAAAGAAGACGAC	59.442	GAAAACGACAACCCTAACCCTAA	60.589	130
Kenaf-1180	CL2390.Contig5_All_1557_1	GAG(3*6)	CGATGTTATATTGAGGGTCGAGA	60.338	CTCATGTTGTTGTTCCTGTTGC	60.592	160
Kenaf-1181	CL2390.Contig5_All_1557_2	GAG(3*6)	CGATGTTATATTGAGGGTCGAGA	60.338	ATGTTGTTGTTCCTGTTGCCTT	60.812	157
Kenaf-1182	CL2390.Contig5_All_1557_3	GAG(3*6)	CGATGTTATATTGAGGGTCGAGA	60.338	ATGTTGTTGTTCCTGTTGCCTTT	61.983	157
Kenaf-1183	CL2390.Contig5_All_1557_4	GAG(3*6)	ACGATGTTATATTGAGGGTCGAG	59.407	ATGTTGTTGTTCCTGTTGCCTT	60.812	158
Kenaf-1184	CL2390.Contig5_All_1557_5	GAG(3*6)	AGACGATGTTATATTGAGGGTCG	59.407	ATGTTGTTGTTCCTGTTGCCTT	60.812	160
Kenaf-1185	CL2391.Contig4_All_1558_1	GAA(3*6)	CTCTGCATTCCTCTATCAACCAC	60.144	TGGAAAGCTCGTTTTACAAACTC	59.821	153
Kenaf-1186	CL2391.Contig4_All_1558_2	GAA(3*6)	ACTCTGCATTCCTCTATCAACCA	60.144	TGGAAAGCTCGTTTTACAAACTC	59.821	154
Kenaf-1187	CL2391.Contig4_All_1558_3	GAA(3*6)	CTCTGCATTCCTCTATCAACCAC	60.144	GAAAGCTCGTTTTACAAACTCCC	60.496	151
Kenaf-1188	CL2391.Contig4_All_1558_4	GAA(3*6)	CTCTGCATTCCTCTATCAACCAC	60.144	GGAAAGCTCGTTTTACAAACTCC	60.496	152
Kenaf-1189	CL2391.Contig4_All_1558_5	GAA(3*6)	ACTCTGCATTCCTCTATCAACCA	60.144	GAAAGCTCGTTTTACAAACTCCC	60.496	152
Kenaf-1190	CL2391.Contig4_All_1559_1	GAA(3*5)	ATGTACTCTAATGGGATCTGGGC	60.573	ATTCAGAAGCCCGTAATTTCCT	60.321	109
Kenaf-1191	CL2391.Contig4_All_1559_2	GAA(3*5)	ATGTACTCTAATGGGATCTGGGC	60.573	GTAATTTCCTTCCCACTCCCTTC	61.335	97
Kenaf-1192	CL2391.Contig4_All_1559_3	GAA(3*5)	ATGTACTCTAATGGGATCTGGGC	60.573	ATTCAGAAGCCCGTAATTTCCTT	61.427	109
Kenaf-1193	CL2391.Contig4_All_1559_4	GAA(3*5)	ATGTACTCTAATGGGATCTGGGC	60.573	TAATTTCCTTCCCACTCCCTTC	60.638	96
Kenaf-1194	CL2391.Contig4_All_1559_5	GAA(3*5)	GATGTACTCTAATGGGATCTGGG	58.86	ATTCAGAAGCCCGTAATTTCCT	60.321	110
Kenaf-1195	CL2403.Contig2_All_1560_1	CAA(3*6)	CTCGACTCTCAACAACCTCAAAT	59.803	ATTTTCCCCATTCAGTACCAGTT	59.998	90
Kenaf-1196	CL2403.Contig2_All_1560_2	CAA(3*6)	CTCGACTCTCAACAACCTCAAAT	59.803	TTGAAAGTGAAGGGACTGTGATT	60.026	155
Kenaf-1197	CL2403.Contig2_All_1560_3	CAA(3*6)	CTCGACTCTCAACAACCTCAAAT	59.803	TTTTTCATTTTCCCCATTCAGTA	59.715	96
Kenaf-1198	CL2403.Contig2_All_1560_4	CAA(3*6)	TCCAGGCCATGTATTTTAGTCTC	59.515	ATTTTCCCCATTCAGTACCAGTT	59.998	157
Kenaf-1199	CL2403.Contig7_All_1561_1	TTG(3*6)	ATTTTCCCCATTCAGTACCAGTT	59.998	CTCGACTCTCAACAACCTCAAAT	59.803	90
Kenaf-1200	CL2403.Contig7_All_1561_2	TTG(3*6)	TTGAAAGTGAAGGGACTGTGATT	60.026	CTCGACTCTCAACAACCTCAAAT	59.803	155
Kenaf-1201	CL2403.Contig7_All_1561_3	TTG(3*6)	TTTTTCATTTTCCCCATTCAGTA	59.715	CTCGACTCTCAACAACCTCAAAT	59.803	96
Kenaf-1202	CL2403.Contig7_All_1561_4	TTG(3*6)	ATTTTCCCCATTCAGTACCAGTT	59.998	TCCAGGCCATGTATTTTAGTCTC	59.515	157
Kenaf-1203	CL2403.Contig7_All_1561_5	TTG(3*6)	ATTTTCCCCATTCAGTACCAGTT	59.998	CGACTCTCAACAACCTCAAATGT	60.574	88
Kenaf-1204	CL241.Contig1_All_244_1	CT(2*8)	AAGTTCCCCTCTTCTGATGTTTC	59.995	TTTAATTTGAACCCGGTAATCCT	59.966	99
Kenaf-1205	CL241.Contig1_All_244_2	CT(2*8)	AAGTTCCCCTCTTCTGATGTTTC	59.995	AGTGGGAGAAATCAGTGTGTTGT	59.952	158
Kenaf-1206	CL241.Contig1_All_244_3	CT(2*8)	AAGTTCCCCTCTTCTGATGTTTC	59.995	GGGAGAAATCAGTGTGTTGTTTC	59.899	155
Kenaf-1207	CL241.Contig1_All_244_4	CT(2*8)	AAGTTCCCCTCTTCTGATGTTTC	59.995	TGATTATGGAAGGATTTTGTTGC	60.194	129
Kenaf-1208	CL241.Contig1_All_244_5	CT(2*8)	AAGTTCCCCTCTTCTGATGTTTC	59.995	GGATTTTGTTGCTTCTGCTTTTA	59.795	118
Kenaf-1209	CL2431.Contig4_All_1585_1	TG(2*8)	CAAGCCAAAGTGGTGAATAGAAC	60.048	TGTAGGTAAACCGAACCACAGTT	59.848	135
Kenaf-1210	CL2431.Contig4_All_1585_2	TG(2*8)	CAAGCCAAAGTGGTGAATAGAAC	60.048	TTGTAGGTAAACCGAACCACAGT	59.848	136
Kenaf-1211	CL2431.Contig4_All_1585_3	TG(2*8)	CAAGCCAAAGTGGTGAATAGAAC	60.048	GCATGTTTTGTAGGTAAACCGAA	60.276	143
Kenaf-1212	CL2431.Contig4_All_1585_4	TG(2*8)	GTAAGCATTTTCAAGCCAAAGTG	60.173	TGTAGGTAAACCGAACCACAGTT	59.848	146
Kenaf-1213	CL2431.Contig4_All_1585_5	TG(2*8)	GTAAGCATTTTCAAGCCAAAGTG	60.173	TTGTAGGTAAACCGAACCACAGT	59.848	147
Kenaf-1214	CL2433.Contig2_All_1586_1	AAG(3*6)	AACGGAGGTTTTGGGAATAAATA	59.966	CGTGCTTCTTTTCCTTTTTCTTT	60.262	124
Kenaf-1215	CL2433.Contig2_All_1586_4	AAG(3*6)	ACGGAGGTTTTGGGAATAAATAA	59.966	TTACCTCAACCTCTTCATCCTTG	59.64	84
Kenaf-1216	CL2433.Contig2_All_1586_5	AAG(3*6)	AACGGAGGTTTTGGGAATAAATA	59.966	TTACCTCAACCTCTTCATCCTTG	59.64	85
Kenaf-1217	CL2434.Contig4_All_1588_1	AGG(3*5)	TGAGGACTTATGCTGATGTGATG	60.147	CTGCATCACCACTCTCTTTCTCT	60.067	132
Kenaf-1218	CL2434.Contig4_All_1588_3	AGG(3*5)	ATGCTGATGTGATGAGAGAACAG	59.372	TCCCATCTATTCCTCCTCTTAGG	59.939	157
Kenaf-1219	CL2434.Contig4_All_1588_4	AGG(3*5)	GGACTTATGCTGATGTGATGAGA	59.212	CTGCATCACCACTCTCTTTCTCT	60.067	129
Kenaf-1220	CL2434.Contig4_All_1588_5	AGG(3*5)	GAGGACTTATGCTGATGTGATGA	59.212	CTGCATCACCACTCTCTTTCTCT	60.067	131
Kenaf-1221	CL2441.Contig1_All_1603_1	TTC(3*7)	CTGCACCTGCTTCACTTTTACTT	59.996	ACATGGGTTAGTTTCAAAGAGCA	60.048	147
Kenaf-1222	CL2441.Contig1_All_1603_2	TTC(3*7)	TTCACTTTTACTTCTTCCCCTCC	59.992	ACATGGGTTAGTTTCAAAGAGCA	60.048	137
Kenaf-1223	CL2441.Contig1_All_1603_3	TTC(3*7)	CTGCACCTGCTTCACTTTTACTT	59.996	AATTGTGGGAGGCTGATAAGAAT	60.212	125
Kenaf-1224	CL2441.Contig1_All_1603_4	TTC(3*7)	CTGCACCTGCTTCACTTTTACTT	59.996	TAGTTTCAAAGAGCAATTGTGGG	60.506	139
Kenaf-1225	CL2441.Contig1_All_1603_5	TTC(3*7)	CTGCACCTGCTTCACTTTTACTT	59.996	CATGGGTTAGTTTCAAAGAGCAA	60.506	146
Kenaf-1226	CL2447.Contig2_All_1606_1	TTC(3*6)	CAAACCCTGTTTTTCTCGTTATG	59.92	ATCCTCCTTCTCAGCTTGAACTT	59.908	131
Kenaf-1227	CL2447.Contig2_All_1606_2	TTC(3*6)	CAAACCCTGTTTTTCTCGTTATG	59.92	AATCCTCCTTCTCAGCTTGAACT	59.908	132
Kenaf-1228	CL2447.Contig2_All_1606_5	TTC(3*6)	CAAACCCTGTTTTTCTCGTTATG	59.92	CTCCTTCTCAGCTTGAACTTCTG	59.818	128
Kenaf-1229	CL2452.Contig4_All_1613_1	ATG(3*5)	GCTACTAACAGCAGCCAGTTCAT	59.988	CATGTTCTATTGCCATCTCCAAT	60.218	157
Kenaf-1230	CL2452.Contig4_All_1613_2	ATG(3*5)	AATGAGGATTTGAAAGGTGACAA	59.864	GACGAAGGCTTTTCAACAAACTA	59.821	97
Kenaf-1231	CL2452.Contig4_All_1613_3	ATG(3*5)	CAGAATCTTATCTTGTTGCCCAG	60.136	TATCAAGACGAAGGCTTTTCAAC	59.786	147
Kenaf-1232	CL2456.Contig9_All_1614_1	TTC(3*5)	ACTTCTTCGTCGGGTTTACTTTT	59.611	ATCCACCGCTTATCCTTCTCTC	60.938	131
Kenaf-1233	CL2456.Contig9_All_1614_2	TTC(3*5)	GTTTACTTTTACGCGGCTTCAAC	61.301	ACCACAACCCATCAAAGTAAGC	60.282	92
Kenaf-1234	CL2456.Contig9_All_1614_3	TTC(3*5)	CACTTCTTCGTCGGGTTTACTTT	60.873	ATCCACCGCTTATCCTTCTCTC	60.938	132
Kenaf-1235	CL2456.Contig9_All_1614_4	TTC(3*5)	GTTTACTTTTACGCGGCTTCAAC	61.301	CACCACAACCCATCAAAGTAAG	59.397	93
Kenaf-1236	CL2456.Contig9_All_1614_5	TTC(3*5)	TTTACTTTTACGCGGCTTCAAC	60.626	ACCACAACCCATCAAAGTAAGC	60.282	91
Kenaf-1237	CL2465.Contig3_All_1618_1	TG(2*6)	GATATTGGCTCAGCAGAGGATCT	61.077	TAATCCAAAGGTCACGTAAAGGA	59.886	94
Kenaf-1238	CL2465.Contig3_All_1618_2	TG(2*6)	GATATTGGCTCAGCAGAGGATCT	61.077	AATCCAAAGGTCACGTAAAGGAT	60.121	93
Kenaf-1239	CL2465.Contig3_All_1618_3	TG(2*6)	GATATTGGCTCAGCAGAGGATCT	61.077	GAGGGAAGCACAGGAAGAGTAAT	60.142	113
Kenaf-1240	CL2465.Contig3_All_1618_4	TG(2*6)	GATATTGGCTCAGCAGAGGATCT	61.077	GAAGCACAGGAAGAGTAATCCAA	59.776	109
Kenaf-1241	CL2465.Contig3_All_1618_5	TG(2*6)	GTTTAAAGCTCGGCAGGATATTG	61.247	TAATCCAAAGGTCACGTAAAGGA	59.886	110
Kenaf-1242	CL2471.Contig2_All_1619_1	AT(2*9)	CCATCTGACTGAAGCTTTTTAGC	59.573	CATGACACCAGAATATGAAGCAA	60.011	148
Kenaf-1243	CL2471.Contig2_All_1619_2	AT(2*9)	CCATCTGACTGAAGCTTTTTAGC	59.573	AAGCAAATCACAGTCGGATTCTA	60.143	131
Kenaf-1244	CL2471.Contig2_All_1619_3	AT(2*9)	CCCATCTGACTGAAGCTTTTTAG	59.441	CATGACACCAGAATATGAAGCAA	60.011	149
Kenaf-1245	CL2471.Contig2_All_1619_4	AT(2*9)	TTTTAGCTAGAGGAGAAGCATCG	59.341	CATGACACCAGAATATGAAGCAA	60.011	132
Kenaf-1246	CL2471.Contig2_All_1619_5	AT(2*9)	CCCATCTGACTGAAGCTTTTTAG	59.441	AAGCAAATCACAGTCGGATTCTA	60.143	132
Kenaf-1247	CL247.Contig4_All_245_1	AT(2*6)	TACTGGTTTCATTCCTAACCCAC	59.295	GCCAAGCCTTCATCAAAATATAG	59.186	157
Kenaf-1248	CL247.Contig4_All_245_3	AT(2*6)	GTACTGGTTTCATTCCTAACCCAC	60.044	GCCAAGCCTTCATCAAAATATAG	59.186	158
Kenaf-1249	CL247.Contig4_All_245_5	AT(2*6)	TACTGGTTTCATTCCTAACCCAC	59.295	ATGCCAAGCCTTCATCAAAATA	60.798	159
Kenaf-1250	CL2499.Contig2_All_1628_1	TGG(3*5)	CTAGGAAACCGTTGCATACTTGT	59.61	TCCCACTGAAGAGATGGTTAAAA	59.987	159
Kenaf-1251	CL2499.Contig2_All_1628_2	TGG(3*5)	CTAGGAAACCGTTGCATACTTGT	59.61	AAGCAATCATGAGCAATGAAAGT	60.15	115
Kenaf-1252	CL2499.Contig2_All_1628_3	TGG(3*5)	CTAGGAAACCGTTGCATACTTGT	59.61	CTCCCACTGAAGAGATGGTTAAA	59.64	160
Kenaf-1253	CL2499.Contig2_All_1628_4	TGG(3*5)	AGATGCTATACGTCGAGAGTTGC	59.953	AGCAAGATTTACCTCCACTACCA	59.209	143
Kenaf-1254	CL2499.Contig2_All_1628_5	TGG(3*5)	CTAGGAAACCGTTGCATACTTGT	59.61	CCCACTGAAGAGATGGTTAAAAA	59.527	158
Kenaf-1255	CL2499.Contig2_All_1630_1	AAC(3*5)	ATTAATTCCCCACTTCAACGATT	59.968	TAATTCCCAGGGTTTAATTGGAT	59.816	139
Kenaf-1256	CL2499.Contig2_All_1630_2	AAC(3*5)	ATTAATTCCCCACTTCAACGATT	59.968	ATAATTCCCAGGGTTTAATTGGA	59.816	140
Kenaf-1257	CL2499.Contig2_All_1630_3	AAC(3*5)	ATTAATTCCCCACTTCAACGATT	59.968	GGTTTAATTGGATTTGGGTTGTT	60.202	129
Kenaf-1258	CL2499.Contig2_All_1630_4	AAC(3*5)	ATTAATTCCCCACTTCAACGATT	59.968	TGGGTTGTTTTAGATTTCGGTAA	59.77	115
Kenaf-1259	CL2499.Contig2_All_1630_5	AAC(3*5)	ATTAATTCCCCACTTCAACGATT	59.968	TTGGGTTGTTTTAGATTTCGGTA	59.77	116
Kenaf-1260	CL2501.Contig11_All_1634_1	GAAAG(5*4)	GCCTCATTTCTACAATCCCTTCT	59.984	TAGTCAACAAAAACGCTGGATTT	60.05	146
Kenaf-1261	CL2501.Contig11_All_1634_2	GAAAG(5*4)	AGCCTCATTTCTACAATCCCTTC	59.984	TAGTCAACAAAAACGCTGGATTT	60.05	147
Kenaf-1262	CL2501.Contig11_All_1634_3	GAAAG(5*4)	GAAGCCTCATTTCTACAATCCCT	59.984	TAGTCAACAAAAACGCTGGATTT	60.05	149
Kenaf-1263	CL2501.Contig11_All_1634_4	GAAAG(5*4)	TCATTTCTACAATCCCTTCTCCA	59.952	TAGTCAACAAAAACGCTGGATTT	60.05	143
Kenaf-1264	CL2501.Contig11_All_1634_5	GAAAG(5*4)	GCCTCATTTCTACAATCCCTTCT	59.984	AGATAGTCAACAAAAACGCTGGA	60.176	149
Kenaf-1265	CL2501.Contig6_All_1633_1	ATG(3*5)	CCTCTCTTTCTCTCTTGACTCTGC	60.312	CAAAAAGGTTGACGTCGATAAAG	60.043	155
Kenaf-1266	CL2501.Contig6_All_1633_2	ATG(3*5)	TCTCTTTCTCTCTTGACTCTGCC	59.402	AAAAAGGTTGACGTCGATAAAGC	60.833	152
Kenaf-1267	CL2501.Contig6_All_1633_3	ATG(3*5)	CCGCTAGAAAACGAAGAAACAG	60.406	CAAAAAGGTTGACGTCGATAAAG	60.043	132
Kenaf-1268	CL2501.Contig6_All_1633_4	ATG(3*5)	GCTAGAAAACGAAGAAACAGCG	60.538	CAAAAAGGTTGACGTCGATAAAG	60.043	130
Kenaf-1269	CL2501.Contig6_All_1633_5	ATG(3*5)	CGCTAGAAAACGAAGAAACAGC	60.538	CAAAAAGGTTGACGTCGATAAAG	60.043	131
Kenaf-1270	CL2525.Contig1_All_1637_2	ATC(3*5)	ATACAGCGCAGTACCATCTAAGG	59.721	TAGCCTTTTAGCCGCTGTTTTAT	60.585	131
Kenaf-1271	CL2525.Contig1_All_1637_3	ATC(3*5)	ATACAGCGCAGTACCATCTAAGG	59.721	GTACTGAATCAATCACCATTGGC	60.616	93
Kenaf-1272	CL2525.Contig1_All_1637_4	ATC(3*5)	TCTAAGGTCATCACATGGGTCAT	60.625	ATCTTTTGAAGGAGTAGGGCAGT	59.685	160
Kenaf-1273	CL2534.Contig3_All_1641_1	GCG(3*5)	ATCCATTCCTTCATCGAAAAGTC	60.66	AAAGTACATGAACCTCAACGGAA	59.92	142
Kenaf-1274	CL2534.Contig3_All_1641_2	GCG(3*5)	ATCCATTCCTTCATCGAAAAGTC	60.66	GAAAGTACATGAACCTCAACGGA	60.399	143
Kenaf-1275	CL2534.Contig3_All_1641_3	GCG(3*5)	ATCCATTCCTTCATCGAAAAGTC	60.66	AAGTACATGAACCTCAACGGAAC	59.446	141
Kenaf-1276	CL2534.Contig3_All_1641_4	GCG(3*5)	TCATCGAAAAGTCCATGTAAACG	61.219	AAAGTACATGAACCTCAACGGAA	59.92	132
Kenaf-1277	CL2534.Contig3_All_1641_5	GCG(3*5)	TCCATTCCTTCATCGAAAAGTC	60.431	AAAGTACATGAACCTCAACGGAA	59.92	141
Kenaf-1278	CL2539.Contig1_All_1650_1	AC(2*6)	ATCGTTCACCTCAAGCAGAGTAG	59.957	CCATTGAAGTGAAAGGATGGTTA	60.223	122
Kenaf-1279	CL2539.Contig1_All_1650_2	AC(2*6)	ATCGTTCACCTCAAGCAGAGTAG	59.957	CCGTCTTTTAAACTTCTAGGGCT	59.388	99
Kenaf-1280	CL2539.Contig1_All_1650_3	AC(2*6)	ATCGTTCACCTCAAGCAGAGTAG	59.957	ACCGTCTTTTAAACTTCTAGGGC	59.272	100
Kenaf-1281	CL2539.Contig1_All_1650_4	AC(2*6)	GTTCACCTCAAGCAGAGTAGCTT	59.248	CCATTGAAGTGAAAGGATGGTTA	60.223	119
Kenaf-1282	CL2539.Contig1_All_1650_5	AC(2*6)	ATCGTTCACCTCAAGCAGAGTAG	59.957	TAGGGCTTAGAAGATGTAAGCGG	61.04	83
Kenaf-1283	CL2540.Contig1_All_1651_1	GAG(3*5)	CACCCAACAACTTGACTAGATCC	59.914	CTCAGGATTTCCCTTCTTCATCT	60.082	145
Kenaf-1284	CL2540.Contig1_All_1651_2	GAG(3*5)	CACCCAACAACTTGACTAGATCC	59.914	TTTCCCTTCTTCATCTCCTTCTC	60.189	138
Kenaf-1285	CL2540.Contig1_All_1651_3	GAG(3*5)	CCGTGGCATTAGCTCTACTTAAA	59.829	CATTTGCTAGGATTTTCACTGCT	59.806	99
Kenaf-1286	CL2540.Contig1_All_1651_4	GAG(3*5)	CTAGATCCATTAGCAACAGCAGC	60.416	CTCAGGATTTCCCTTCTTCATCT	60.082	130
Kenaf-1287	CL2540.Contig1_All_1651_5	GAG(3*5)	CACCCAACAACTTGACTAGATCC	59.914	GATTTCCCTTCTTCATCTCCTTC	59.57	140
Kenaf-1288	CL2541.Contig3_All_1656_1	AGA(3*5)	GAAAAACATAAGCCAGACACTCG	60.176	AGGGAGAACTCCTTGAGCGAT	61.627	154
Kenaf-1289	CL2541.Contig3_All_1656_2	AGA(3*5)	GAAAAACATAAGCCAGACACTCG	60.176	GGGAGAACTCCTTGAGCGAT	60.735	153
Kenaf-1290	CL2541.Contig3_All_1656_3	AGA(3*5)	AAAACATAAGCCAGACACTCGTC	59.709	AGGGAGAACTCCTTGAGCGAT	61.627	152
Kenaf-1291	CL2541.Contig3_All_1656_4	AGA(3*5)	AAAACATAAGCCAGACACTCGTC	59.709	GGGAGAACTCCTTGAGCGAT	60.735	151
Kenaf-1292	CL2541.Contig3_All_1656_5	AGA(3*5)	GGAATTGAAAAACATAAGCCAGA	59.512	AGGGAGAACTCCTTGAGCGAT	61.627	160
Kenaf-1293	CL2541.Contig6_All_1657_1	TTC(3*5)	AGGGAGAACTCCTTGAGCGAT	61.627	GAAAAACATAAGCCAGACACTCG	60.176	154
Kenaf-1294	CL2541.Contig6_All_1657_2	TTC(3*5)	GGGAGAACTCCTTGAGCGAT	60.735	GAAAAACATAAGCCAGACACTCG	60.176	153
Kenaf-1295	CL2541.Contig6_All_1657_3	TTC(3*5)	AGGGAGAACTCCTTGAGCGAT	61.627	AAAACATAAGCCAGACACTCGTC	59.709	152
Kenaf-1296	CL2541.Contig6_All_1657_4	TTC(3*5)	GGGAGAACTCCTTGAGCGAT	60.735	AAAACATAAGCCAGACACTCGTC	59.709	151
Kenaf-1297	CL2541.Contig6_All_1657_5	TTC(3*5)	AGGGAGAACTCCTTGAGCGAT	61.627	GGAATTGAAAAACATAAGCCAGA	59.512	160
Kenaf-1298	CL2549.Contig1_All_1660_1	TGA(3*5)	TAACTTCAGCTAATCTTGGTCGC	59.932	GGTAGGATCATCTAATGGGGAAG	60.049	86
Kenaf-1299	CL2549.Contig1_All_1660_2	TGA(3*5)	TAACTTCAGCTAATCTTGGTCGC	59.932	CTGCTCCTCGTCTCATGTAAGAT	59.921	110
Kenaf-1300	CL2549.Contig1_All_1660_3	TGA(3*5)	TATAGCCGTTGATCTCGACTCTC	59.891	GGTAGGATCATCTAATGGGGAAG	60.049	142
Kenaf-1301	CL2549.Contig1_All_1660_4	TGA(3*5)	CTCTCTTTCACCCTGATCTTCAA	59.872	GGTAGGATCATCTAATGGGGAAG	60.049	124
Kenaf-1302	CL2549.Contig1_All_1660_5	TGA(3*5)	TAACTTCAGCTAATCTTGGTCGC	59.932	GTAGGATCATCTAATGGGGAAGC	60.18	85
Kenaf-1303	CL2549.Contig2_All_1662_1	CAT(3*5)	GGTAGGATCATCTAATGGGGAAG	60.049	TAACTTCAGCTAATCTTGGTCGC	59.932	86
Kenaf-1304	CL2549.Contig2_All_1662_2	CAT(3*5)	CTGCTCCTCGTCTCATGTAAGAT	59.921	TAACTTCAGCTAATCTTGGTCGC	59.932	110
Kenaf-1305	CL2549.Contig2_All_1662_3	CAT(3*5)	GAAGAAGCCTTAGTTTTTGCTCC	59.919	TAACTTCAGCTAATCTTGGTCGC	59.932	147
Kenaf-1306	CL2549.Contig2_All_1662_4	CAT(3*5)	GGTAGGATCATCTAATGGGGAAG	60.049	TATAGCCGTTGATCTCGACTCTC	59.891	142
Kenaf-1307	CL2549.Contig2_All_1662_5	CAT(3*5)	GGTAGGATCATCTAATGGGGAAG	60.049	CTCTCTTTCACCCTGATCTTCAA	59.872	124
Kenaf-1308	CL2549.Contig5_All_1663_1	TCT(3*6)	GATTGAAGATGCTGAAAATCAGG	60.089	CTGTTACACTCCAAGCTACCCAC	60.102	102
Kenaf-1309	CL2549.Contig5_All_1663_2	TCT(3*6)	GATTGAAGATGCTGAAAATCAGG	60.089	ACTGTTACACTCCAAGCTACCCA	60.102	103
Kenaf-1310	CL2549.Contig5_All_1663_3	TCT(3*6)	GATTGAAGATGCTGAAAATCAGG	60.089	CACTGTTACACTCCAAGCTACCC	60.102	104
Kenaf-1311	CL2549.Contig5_All_1663_4	TCT(3*6)	AGGATTGAAGATGCTGAAAATCA	60.089	CTGTTACACTCCAAGCTACCCAC	60.102	104
Kenaf-1312	CL2549.Contig5_All_1663_5	TCT(3*6)	AGGATTGAAGATGCTGAAAATCA	60.089	ACTGTTACACTCCAAGCTACCCA	60.102	105
Kenaf-1313	CL2555.Contig23_All_1677_1	CAG(3*5)	AGCAGCAATTGGAACTTCAAC	59.373	AACAATTTAATTTGGTGGTGACG	60.03	136
Kenaf-1314	CL2555.Contig23_All_1677_4	CAG(3*5)	CAGCAGCAATTGGAACTTCAAC	62.055	AACAATTTAATTTGGTGGTGACG	60.03	137
Kenaf-1315	CL2555.Contig23_All_1677_5	CAG(3*5)	AGCAGCAATTGGAACTTCAAC	59.373	ACAATTTAATTTGGTGGTGACGA	60.495	135
Kenaf-1316	CL2559.Contig1_All_1683_1	AG(2*6)	AGGGAAAGGTTTGAAGTGAAAAG	60.025	CAACAGCCACCTTCTATCGTTAC	60.069	159
Kenaf-1317	CL2559.Contig1_All_1683_2	AG(2*6)	GCCTATTGGTTTAGTGGTGTTTG	59.821	CATTTAGATCAACAGCCACCTTC	60.014	105
Kenaf-1318	CL2559.Contig1_All_1683_3	AG(2*6)	TGCCTATTGGTTTAGTGGTGTTT	59.821	CATTTAGATCAACAGCCACCTTC	60.014	106
Kenaf-1319	CL2559.Contig1_All_1683_4	AG(2*6)	TTGCCTATTGGTTTAGTGGTGTT	59.821	CATTTAGATCAACAGCCACCTTC	60.014	107
Kenaf-1320	CL2559.Contig1_All_1683_5	AG(2*6)	TTTGCCTATTGGTTTAGTGGTGT	59.821	CATTTAGATCAACAGCCACCTTC	60.014	108
Kenaf-1321	CL2561.Contig1_All_1684_1	TA(2*6)	GTTCACTCCCCTCTTCAGAGATT	60.123	AGCCTAATTTGGAATTCACCTTG	60.68	157
Kenaf-1322	CL2561.Contig1_All_1684_2	TA(2*6)	GTTCACTCCCCTCTTCAGAGATT	60.123	CAAGCCTAATTTGGAATTCACCT	60.68	159
Kenaf-1323	CL2561.Contig1_All_1684_3	TA(2*6)	AGTTCACTCCCCTCTTCAGAGAT	59.769	AGCCTAATTTGGAATTCACCTTG	60.68	158
Kenaf-1324	CL2561.Contig1_All_1684_4	TA(2*6)	AGTTCACTCCCCTCTTCAGAGAT	59.769	CAAGCCTAATTTGGAATTCACCT	60.68	160
Kenaf-1325	CL2561.Contig1_All_1684_5	TA(2*6)	GTTCACTCCCCTCTTCAGAGATT	60.123	GCCTAATTTGGAATTCACCTTG	59.844	156
Kenaf-1326	CL2561.Contig4_All_1690_1	AGG(3*5)	AAAGAAGGAGATGAATCCAAAGG	59.958	CTTGGTTTCTTGAGACCCATAAG	59.183	101
Kenaf-1327	CL2561.Contig4_All_1690_2	AGG(3*5)	AAAGAAGGAGATGAATCCAAAGG	59.958	AACACCAACACCCGGTACTCTAT	60.908	148
Kenaf-1328	CL2561.Contig4_All_1690_3	AGG(3*5)	AAAGAAGGAGATGAATCCAAAGG	59.958	AACAGGAGCTTGGTTTCTTGAG	59.922	109
Kenaf-1329	CL2561.Contig4_All_1690_4	AGG(3*5)	AAAGAAGGAGATGAATCCAAAGG	59.958	ACACCAACACCCGGTACTCTAT	59.682	147
Kenaf-1330	CL2561.Contig4_All_1690_5	AGG(3*5)	AAAGAAGGAGATGAATCCAAAGG	59.958	AGCTTGGTTTCTTGAGACCCATA	61.327	103
Kenaf-1331	CL2561.Contig5_All_1691_1	CCT(3*5)	CAACATCCGGTACTGTATCAACA	59.799	AAAGAAGGAGATGAATCCAAAGG	59.958	140
Kenaf-1332	CL2561.Contig5_All_1691_2	CCT(3*5)	CAACAACATCCGGTACTGTATCA	59.799	AAAGAAGGAGATGAATCCAAAGG	59.958	143
Kenaf-1333	CL2561.Contig5_All_1691_3	CCT(3*5)	GTATCAACATCAGCAGCATCAAG	59.789	AAAGAAGGAGATGAATCCAAAGG	59.958	126
Kenaf-1334	CL2561.Contig5_All_1691_4	CCT(3*5)	CATCCGGTACTGTATCAACATCA	59.761	AAAGAAGGAGATGAATCCAAAGG	59.958	137
Kenaf-1335	CL2561.Contig5_All_1691_5	CCT(3*5)	CGGTACTGTATCAACATCAGCAG	59.707	AAAGAAGGAGATGAATCCAAAGG	59.958	133
Kenaf-1336	CL2561.Contig9_All_1694_2	CCT(3*5)	AACAGGAGCTTGGTTTCTTGAG	59.922	AAAGAAGGAGATGAATCCAAAGG	59.958	109
Kenaf-1337	CL2561.Contig9_All_1694_3	CCT(3*5)	ATCTGCAACACCCGGTACTCTAT	61.128	AAAGAAGGAGATGAATCCAAAGG	59.958	148
Kenaf-1338	CL2569.Contig2_All_1695_1	CA(2*7)	ATCCATGCACTTAAAGAACCAAA	59.891	AGCTTCCTGGTGATGTGTATGTT	59.942	141
Kenaf-1339	CL2569.Contig2_All_1695_2	CA(2*7)	ATCCATACAAGTTCAGCACATCC	60.263	AGCTTCCTGGTGATGTGTATGTT	59.942	160
Kenaf-1340	CL2569.Contig2_All_1695_3	CA(2*7)	TCCATGCACTTAAAGAACCAAAC	60.389	AGCTTCCTGGTGATGTGTATGTT	59.942	140
Kenaf-1341	CL2569.Contig2_All_1695_4	CA(2*7)	CCATGCACTTAAAGAACCAAACT	59.589	AGCTTCCTGGTGATGTGTATGTT	59.942	139
Kenaf-1342	CL2569.Contig2_All_1695_5	CA(2*7)	ATCCATGCACTTAAAGAACCAAA	59.891	ATTTCCCTTCTTTTGCCTGTACT	59.575	105
Kenaf-1343	CL2569.Contig2_All_1696_1	CAG(3*6)	GTACTAACCACCACCTTTTTCGC	61.103	TGGAAGCTTCAGACTACACATCA	59.928	157
Kenaf-1344	CL2569.Contig2_All_1696_2	CAG(3*6)	AGTACTAACCACCACCTTTTTCG	58.686	TGGAAGCTTCAGACTACACATCA	59.928	158
Kenaf-1345	CL2569.Contig2_All_1696_3	CAG(3*6)	TACTAACCACCACCTTTTTCGC	60.395	TGGAAGCTTCAGACTACACATCA	59.928	156
Kenaf-1346	CL2569.Contig2_All_1696_4	CAG(3*6)	GTACTAACCACCACCTTTTTCGC	61.103	CGTGGAAGCTTCAGACTACACAT	60.725	159
Kenaf-1347	CL2569.Contig2_All_1696_5	CAG(3*6)	GTACTAACCACCACCTTTTTCGC	61.103	AAGCTTCAGACTACACATCAGCA	59.207	154
Kenaf-1348	CL2569.Contig3_All_1697_1	TGC(3*6)	TGGAAGCTTCAGACTACACATCA	59.928	GTACTAACCACCACCTTTTTCGC	61.103	157
Kenaf-1349	CL2569.Contig3_All_1697_2	TGC(3*6)	TGGAAGCTTCAGACTACACATCA	59.928	AGTACTAACCACCACCTTTTTCG	58.686	158
Kenaf-1350	CL2569.Contig3_All_1697_3	TGC(3*6)	TGGAAGCTTCAGACTACACATCA	59.928	TACTAACCACCACCTTTTTCGC	60.395	156
Kenaf-1351	CL2569.Contig3_All_1697_4	TGC(3*6)	CGTGGAAGCTTCAGACTACACAT	60.725	GTACTAACCACCACCTTTTTCGC	61.103	159
Kenaf-1352	CL2569.Contig3_All_1697_5	TGC(3*6)	AAGCTTCAGACTACACATCAGCA	59.207	GTACTAACCACCACCTTTTTCGC	61.103	154
Kenaf-1353	CL2573.Contig5_All_1739_1	AGA(3*5)	GTACGAAAGAAAGCTGCTGAGAG	59.854	GGCATTCATGGAGTTCTAGTGAC	60.018	140
Kenaf-1354	CL2573.Contig5_All_1739_2	AGA(3*5)	GTACGAAAGAAAGCTGCTGAGAG	59.854	TCTGGCATTCATGGAGTTCTAGT	60.144	143
Kenaf-1355	CL2573.Contig5_All_1739_3	AGA(3*5)	CTTTGTACGAAAGAAAGCTGCTG	60.573	GGCATTCATGGAGTTCTAGTGAC	60.018	144
Kenaf-1356	CL2573.Contig5_All_1739_4	AGA(3*5)	CTTTGTACGAAAGAAAGCTGCTG	60.573	TCTGGCATTCATGGAGTTCTAGT	60.144	147
Kenaf-1357	CL2573.Contig5_All_1739_5	AGA(3*5)	TACGAAAGAAAGCTGCTGAGAGA	60.793	GGCATTCATGGAGTTCTAGTGAC	60.018	139
Kenaf-1358	CL2576.Contig3_All_1744_1	AGC(3*5)	GGAGAGGAGGAAGAAGAAGATGA	60.323	GAAGACGATATTGCTCTCAAGGA	59.87	128
Kenaf-1359	CL2576.Contig3_All_1744_2	AGC(3*5)	GGAGAGGAGGAAGAAGAAGATGA	60.323	GGAGAAGACGATATTGCTCTCAA	59.87	131
Kenaf-1360	CL2576.Contig3_All_1744_3	AGC(3*5)	GGAGAGGAGGAAGAAGAAGATGA	60.323	AAGTGTTGGGAGAAGGAGAAGAC	60.157	145
Kenaf-1361	CL2576.Contig3_All_1744_4	AGC(3*5)	GGAGAGGAGGAAGAAGAAGATGA	60.323	GATATTGCTCTCAAGGAACTCCA	59.739	122
Kenaf-1362	CL2576.Contig3_All_1744_5	AGC(3*5)	GGAGAGGAGGAAGAAGAAGATGA	60.323	AGATTCGAACTGATTGTACCGAG	59.666	100
Kenaf-1363	CL2576.Contig4_All_1745_4	AGC(3*5)	GGAGAGGAGGAAGAAGAAGATGA	60.323	GAATTCCAGATTCCAACTGATTG	59.828	107
Kenaf-1364	CL2576.Contig4_All_1745_5	AGC(3*5)	GGAGAGGAGGAAGAAGAAGATGA	60.323	AGGAATTCCAGATTCCAACTGAT	60.196	109
Kenaf-1365	CL2578.Contig1_All_1746_1	GTG(3*5)	TTTGTTCAGAGGGGATATTCTGA	59.952	TAAAACCACTTCCACCTTTCTGA	60.022	107
Kenaf-1366	CL2578.Contig1_All_1746_2	GTG(3*5)	AAAATCCTAATGGGACATATGGG	60.152	TAAAACCACTTCCACCTTTCTGA	60.022	135
Kenaf-1367	CL2578.Contig1_All_1746_3	GTG(3*5)	TATGGGATTTGTTTGTTCAGAGG	60.223	TAAAACCACTTCCACCTTTCTGA	60.022	118
Kenaf-1368	CL2578.Contig1_All_1746_4	GTG(3*5)	AAAATCCTAATGGGACATATGGG	60.152	AAACCACTTCCACCTTTCTGAAT	60.261	133
Kenaf-1369	CL2578.Contig1_All_1746_5	GTG(3*5)	TTGTTCAGAGGGGATATTCTGAG	59.601	TAAAACCACTTCCACCTTTCTGA	60.022	106
Kenaf-1370	CL2578.Contig7_All_1747_1	ACC(3*5)	TAAAACCACTTCCACCTTTCTGA	60.022	TTTGTTCAGAGGGGATATTCTGA	59.952	107
Kenaf-1371	CL2578.Contig7_All_1747_2	ACC(3*5)	TAAAACCACTTCCACCTTTCTGA	60.022	AAAATCCTAATGGGACATATGGG	60.152	135
Kenaf-1372	CL2578.Contig7_All_1747_3	ACC(3*5)	TAAAACCACTTCCACCTTTCTGA	60.022	TATGGGATTTGTTTGTTCAGAGG	60.223	118
Kenaf-1373	CL2578.Contig7_All_1747_4	ACC(3*5)	AAACCACTTCCACCTTTCTGAAT	60.261	AAAATCCTAATGGGACATATGGG	60.152	133
Kenaf-1374	CL2578.Contig7_All_1747_5	ACC(3*5)	TAAAACCACTTCCACCTTTCTGA	60.022	TTGTTCAGAGGGGATATTCTGAG	59.601	106
Kenaf-1375	CL258.Contig3_All_251_1	ATTT(4*5)	AAATAACCAACCCCAGGTATCAC	60.224	TCCAACAACAAAGGATTCTCAAT	59.864	239
Kenaf-1376	CL258.Contig3_All_251_2	ATTT(4*5)	TAACCAACCCCAGGTATCACATA	60.35	TCCAACAACAAAGGATTCTCAAT	59.864	236
Kenaf-1377	CL258.Contig3_All_251_3	ATTT(4*5)	CCCAGGTATCACATATCCATTTC	59.455	TCCAACAACAAAGGATTCTCAAT	59.864	228
Kenaf-1378	CL258.Contig3_All_251_4	ATTT(4*5)	ACCCCAGGTATCACATATCCATT	60.555	TCCAACAACAAAGGATTCTCAAT	59.864	230
Kenaf-1379	CL258.Contig3_All_251_5	ATTT(4*5)	AACCCCAGGTATCACATATCCAT	60.555	TCCAACAACAAAGGATTCTCAAT	59.864	231
Kenaf-1380	CL2590.Contig2_All_1749_1	TCT(3*6)	CGAAGACGAGATCGCTGAAG	61.216	TTCAATTTGCTTTGGTTGTTCTT	60.03	100
Kenaf-1381	CL2590.Contig2_All_1749_2	TCT(3*6)	CGAAGACGAGATCGCTGAA	60.232	TTCAATTTGCTTTGGTTGTTCTT	60.03	100
Kenaf-1382	CL2590.Contig2_All_1749_3	TCT(3*6)	CGAAGACGAGATCGCTGAAG	61.216	TTCTTCTACTGCCTTTTGACTGC	60.069	82
Kenaf-1383	CL2590.Contig2_All_1749_4	TCT(3*6)	CGAAGACGAGATCGCTGAA	60.232	TTCTTCTACTGCCTTTTGACTGC	60.069	82
Kenaf-1384	CL2590.Contig2_All_1749_5	TCT(3*6)	CCGAGACCGAAGACGAGAT	60.356	TTCAATTTGCTTTGGTTGTTCTT	60.03	107
Kenaf-1385	CL2607.Contig2_All_1750_1	CCGGTT(6*4)	AGTCAACCTGCTCTGCAAATACT	59.49	GAGTTAGATGCCGCTGTTACTG	59.068	160
Kenaf-1386	CL2607.Contig2_All_1750_2	CCGGTT(6*4)	CTGCAAATACTTGAGAAACAGCG	61.278	AATGTTAACAGAGCAGGCCACT	60.192	125
Kenaf-1387	CL2607.Contig2_All_1750_3	CCGGTT(6*4)	TCTGCAAATACTTGAGAAACAGC	58.712	AATGTTAACAGAGCAGGCCACT	60.192	126
Kenaf-1388	CL2607.Contig2_All_1750_4	CCGGTT(6*4)	GCTCTGCAAATACTTGAGAAACA	58.712	AATGTTAACAGAGCAGGCCACT	60.192	128
Kenaf-1389	CL2607.Contig2_All_1750_5	CCGGTT(6*4)	CTCTGCAAATACTTGAGAAACAGC	59.623	AATGTTAACAGAGCAGGCCACT	60.192	127
Kenaf-1390	CL2608.Contig1_All_1751_1	CAA(3*5)	ACTTTTCCTTACTCCCCAGAGTG	60.043	CCCTTTATTGAAAACCTGTTCCT	59.774	158
Kenaf-1391	CL2608.Contig1_All_1751_2	CAA(3*5)	ACTTTTCCTTACTCCCCAGAGTG	60.043	ACCCTTTATTGAAAACCTGTTCC	59.657	159
Kenaf-1392	CL2608.Contig1_All_1751_3	CAA(3*5)	CCTACTTTTCCTTACTCCCCAGA	60.005	TTATTGAAAACCTGTTCCTTTCG	59.544	157
Kenaf-1393	CL2608.Contig1_All_1751_4	CAA(3*5)	TCCTACTTTTCCTTACTCCCCAG	60.005	TTATTGAAAACCTGTTCCTTTCG	59.544	158
Kenaf-1394	CL2608.Contig1_All_1751_5	CAA(3*5)	CTCCTACTTTTCCTTACTCCCCA	60.005	TTATTGAAAACCTGTTCCTTTCG	59.544	159
Kenaf-1395	CL2608.Contig7_All_1752_4	AG(2*6)	CCTCCCATCTTATTTATTCCCAC	59.93	AATACTCCTTTTTGACGCCTCTC	60.14	134
Kenaf-1396	CL2608.Contig7_All_1752_5	AG(2*6)	CCTCCCATCTTATTTATTCCCAC	59.93	GAATACTCCTTTTTGACGCCTCT	60.14	135
Kenaf-1397	CL2608.Contig7_All_1753_1	GA(2*6)	GCGAAGGAGATTTAAAAAGAAGC	59.892	TAAGGAAAGGAAGTAACTTGGCA	59.337	158
Kenaf-1398	CL2608.Contig7_All_1753_2	GA(2*6)	TGCAGTACATACAGTGACACAAGG	60.153	TGTATATATTACCCAAAGGCCGA	59.631	146
Kenaf-1399	CL2608.Contig7_All_1753_3	GA(2*6)	CGAAGGAGATTTAAAAAGAAGCA	59.098	TAAGGAAAGGAAGTAACTTGGCA	59.337	157
Kenaf-1400	CL2608.Contig7_All_1753_4	GA(2*6)	TGCGAAGGAGATTTAAAAAGAAG	59.098	TAAGGAAAGGAAGTAACTTGGCA	59.337	159
Kenaf-1401	CL2608.Contig7_All_1753_5	GA(2*6)	GCGAAGGAGATTTAAAAAGAAGC	59.892	TTAAGGAAAGGAAGTAACTTGGCA	60.482	159
Kenaf-1402	CL2608.Contig7_All_1754_1	AAG(3*5)	CAAATACATGGCAGGTTTGAACT	60.282	CAGAACTTTGAAACCACCAAAAG	60.055	150
Kenaf-1403	CL2608.Contig7_All_1754_2	AAG(3*5)	CAAATACATGGCAGGTTTGAACT	60.282	TTGAAACCACCAAAAGCACTAAT	59.926	143
Kenaf-1404	CL2608.Contig7_All_1754_3	AAG(3*5)	CAAATACATGGCAGGTTTGAACT	60.282	ATTCAGAACTTTGAAACCACCAA	59.9	153
Kenaf-1405	CL2608.Contig7_All_1754_4	AAG(3*5)	TACAAATACATGGCAGGTTTGAA	59.415	CAGAACTTTGAAACCACCAAAAG	60.055	152
Kenaf-1406	CL2608.Contig7_All_1754_5	AAG(3*5)	TACAAATACATGGCAGGTTTGAA	59.415	TTGAAACCACCAAAAGCACTAAT	59.926	145
Kenaf-1407	CL2611.Contig1_All_1755_1	AAG(3*5)	TTGCTGGGTTGTTTTATTTTTACA	59.825	TTTAAAGGAGCTTTCATGGACTG	59.78	111
Kenaf-1408	CL2611.Contig1_All_1755_2	AAG(3*5)	TTGCTGGGTTGTTTTATTTTTACA	59.825	TTAAAGGAGCTTTCATGGACTGA	60.243	110
Kenaf-1409	CL2611.Contig1_All_1755_3	AAG(3*5)	TACTTTTGCTCGCATTGTTTCTT	60.295	GTGCGGACTCTTGTATTCATCA	60.14	154
Kenaf-1410	CL2611.Contig1_All_1755_4	AAG(3*5)	TTACTTTTGCTCGCATTGTTTCT	60.295	GTGCGGACTCTTGTATTCATCA	60.14	155
Kenaf-1411	CL2611.Contig1_All_1755_5	AAG(3*5)	CTTACTTTTGCTCGCATTGTTTC	60.295	GTGCGGACTCTTGTATTCATCA	60.14	156
Kenaf-1412	CL2614.Contig2_All_1759_1	CT(2*8)	ACCCAGGAGTCTTCTTTTGATTC	59.995	AACGACAACTTTTGTTCTTTCCA	60.062	115
Kenaf-1413	CL2614.Contig2_All_1759_2	CT(2*8)	ACCCAGGAGTCTTCTTTTGATTC	59.995	CAACGACAACTTTTGTTCTTTCC	60.062	116
Kenaf-1414	CL2614.Contig2_All_1759_3	CT(2*8)	AGATGCTGCTTTTTAGTTCATGC	59.938	AACGACAACTTTTGTTCTTTCCA	60.062	143
Kenaf-1415	CL2614.Contig2_All_1759_4	CT(2*8)	AGATGCTGCTTTTTAGTTCATGC	59.938	CAACGACAACTTTTGTTCTTTCC	60.062	144
Kenaf-1416	CL2614.Contig2_All_1759_5	CT(2*8)	CCAGGAGTCTTCTTTTGATTCCT	60.115	AACGACAACTTTTGTTCTTTCCA	60.062	113
Kenaf-1417	CL2631.Contig1_All_1767_1	TGA(3*7)	AAACAAGCAATGAGGCAGAATAA	60.141	CCAATAAATCATAGTCGTCCGAA	60.207	151
Kenaf-1418	CL2631.Contig1_All_1767_2	TGA(3*7)	AAACAAGCAATGAGGCAGAATAA	60.141	TTCCAATAAATCATAGTCGTCCG	60.207	153
Kenaf-1419	CL2631.Contig1_All_1767_3	TGA(3*7)	AAAACAAGCAATGAGGCAGAATA	60.141	CCAATAAATCATAGTCGTCCGAA	60.207	152
Kenaf-1420	CL2631.Contig1_All_1767_4	TGA(3*7)	AAAACAAGCAATGAGGCAGAATA	60.141	TTCCAATAAATCATAGTCGTCCG	60.207	154
Kenaf-1421	CL2631.Contig1_All_1767_5	TGA(3*7)	CAAGCAATGAGGCAGAATAAGTT	59.806	CCAATAAATCATAGTCGTCCGAA	60.207	148
Kenaf-1422	CL2631.Contig2_All_1768_1	TGA(3*5)	GAGCTTCAACGTCAAAGTTCAGT	59.978	CCAATAGATCATAGTCGTCCGAA	60.338	103
Kenaf-1423	CL2631.Contig2_All_1768_2	TGA(3*5)	GAGCTTCAACGTCAAAGTTCAGT	59.978	TTCCAATAGATCATAGTCGTCCG	60.338	105
Kenaf-1424	CL2631.Contig2_All_1768_3	TGA(3*5)	GAGCTTCAACGTCAAAGTTCAGT	59.978	TAGATCATAGTCGTCCGAACCTG	60.508	99
Kenaf-1425	CL2631.Contig2_All_1768_4	TGA(3*5)	GAGCTTCAACGTCAAAGTTCAGT	59.978	AACAGAACAAGTTGAGCTCCCTA	59.464	159
Kenaf-1426	CL2631.Contig2_All_1768_5	TGA(3*5)	CTGTGTCAAGTGATGAGGATGAG	59.777	CCAATAGATCATAGTCGTCCGAA	60.338	123
Kenaf-1427	CL2643.Contig3_All_1770_1	CTA(3*6)	AGGGAACTGGAACTGGTTATTGT	60.155	ATGAAGAAAATGGGTGTGCTG	59.985	143
Kenaf-1428	CL2643.Contig3_All_1770_3	CTA(3*6)	AGGGAACTGGAACTGGTTATTGT	60.155	GTTTCTAAGCCCCAAGTCGAGAT	62.084	100
Kenaf-1429	CL2643.Contig3_All_1770_4	CTA(3*6)	AGGGAACTGGAACTGGTTATTGT	60.155	ACGACGACGATGAAGAAAATG	60.125	152
Kenaf-1430	CL2643.Contig3_All_1770_5	CTA(3*6)	AGGGAACTGGAACTGGTTATTGT	60.155	ACGATGAAGAAAATGGGTGTG	59.845	146
Kenaf-1431	CL2643.Contig3_All_1772_1	GA(2*9)	GGCACAGTATTACTAGAAGCCCA	59.7	TGTCCTTATCAGTTCCCTTACCA	59.879	147
Kenaf-1432	CL2643.Contig3_All_1772_2	GA(2*9)	TGGCACAGTATTACTAGAAGCCC	59.7	TGTCCTTATCAGTTCCCTTACCA	59.879	148
Kenaf-1433	CL2643.Contig3_All_1772_3	GA(2*9)	GGCACAGTATTACTAGAAGCCCA	59.7	CCAATGTCCTTATCAGTTCCCTT	60.576	151
Kenaf-1434	CL2643.Contig3_All_1772_4	GA(2*9)	TGGCACAGTATTACTAGAAGCCC	59.7	CCAATGTCCTTATCAGTTCCCTT	60.576	152
Kenaf-1435	CL2643.Contig3_All_1772_5	GA(2*9)	TTGAGGAAGGTGGCACAGTATTA	60.881	TGTCCTTATCAGTTCCCTTACCA	59.879	158
Kenaf-1436	CL2652.Contig1_All_1774_2	GAC(3*5)	GAAGACGAAGACGAAGAAGATGA	60.012	GAAAATGGAGAAGAAGGGAAAAG	59.617	99
Kenaf-1437	CL2652.Contig1_All_1774_3	GAC(3*5)	GATGAAGACGAAGACGAAGAAGA	60.012	GAAAATGGAGAAGAAGGGAAAAG	59.617	102
Kenaf-1438	CL2652.Contig1_All_1774_4	GAC(3*5)	GAAGATGAAGACGAAGACGAAGA	60.012	GAAAATGGAGAAGAAGGGAAAAG	59.617	105
Kenaf-1439	CL2652.Contig1_All_1774_5	GAC(3*5)	GGAATTGAGGAAATTGATGATGA	60.144	GAAAATGGAGAAGAAGGGAAAAG	59.617	141
Kenaf-1440	CL2654.Contig8_All_1783_1	TTC(3*7)	ATGGCTTCCTTTTCTTCTTCTTG	60.236	GAGAAGGCTGAGGGAAAGGTAT	60.095	146
Kenaf-1441	CL2654.Contig8_All_1783_2	TTC(3*7)	CAATGGCTTCCTTTTCTTCTTCT	60.236	GAGAAGGCTGAGGGAAAGGTAT	60.095	148
Kenaf-1442	CL2654.Contig8_All_1783_3	TTC(3*7)	TTCAATGGCTTCCTTTTCTTCTT	60.561	GAGAAGGCTGAGGGAAAGGTAT	60.095	150
Kenaf-1443	CL2654.Contig8_All_1783_4	TTC(3*7)	CATCTTCAATGGCTTCCTTTTCT	60.924	GAGAAGGCTGAGGGAAAGGTAT	60.095	154
Kenaf-1444	CL2654.Contig8_All_1783_5	TTC(3*7)	CTCATCTTCAATGGCTTCCTTTT	60.924	GAGAAGGCTGAGGGAAAGGTAT	60.095	156
Kenaf-1445	CL2665.Contig1_All_1785_1	CAG(3*5)	TTTCATTCATTGCAACATCAATC	59.83	CAATCATACGCAGGTGAGTAGC	59.797	146
Kenaf-1446	CL2665.Contig1_All_1785_2	CAG(3*5)	TCATTTTCATTCATTGCAACATC	59.83	CAATCATACGCAGGTGAGTAGC	59.797	150
Kenaf-1447	CL2665.Contig1_All_1785_3	CAG(3*5)	TCTTGTCTGCCACTAGAAGAAGC	60.199	CAATCATACGCAGGTGAGTAGC	59.797	111
Kenaf-1448	CL2665.Contig1_All_1785_4	CAG(3*5)	TCTCATTTTCATTCATTGCAACA	60.482	CAATCATACGCAGGTGAGTAGC	59.797	152
Kenaf-1449	CL2665.Contig1_All_1785_5	CAG(3*5)	ATTTTCATTCATTGCAACATCAA	59.358	CAATCATACGCAGGTGAGTAGC	59.797	148
Kenaf-1450	CL266.Contig11_All_258_1	CAG(3*7)	CCGTGTTTTAGTGGACAATGTTT	60.188	GCATTTGTCTGTTGTCCCATTAT	60.129	102
Kenaf-1451	CL266.Contig11_All_258_2	CAG(3*7)	CCGTGTTTTAGTGGACAATGTTT	60.188	CTGATTTTGCTGTGTATTTGCAG	59.829	124
Kenaf-1452	CL266.Contig11_All_258_3	CAG(3*7)	ACCGTGTTTTAGTGGACAATGTT	59.725	GCATTTGTCTGTTGTCCCATTAT	60.129	103
Kenaf-1453	CL266.Contig11_All_258_4	CAG(3*7)	CCGTGTTTTAGTGGACAATGTTT	60.188	TTGTTGCCCAATTAACTGATTTT	59.775	139
Kenaf-1454	CL266.Contig11_All_258_5	CAG(3*7)	CCGTGTTTTAGTGGACAATGTTT	60.188	TTTGTTGCCCAATTAACTGATTT	59.775	140
Kenaf-1455	CL266.Contig13_All_260_1	CAG(3*7)	ATAACAATCTGATGGGTTTCGAG	59.385	GCATTTGTCTGTTGTCCCATTAT	60.129	143
Kenaf-1456	CL266.Contig13_All_260_5	CAG(3*7)	ATAACAATCTGATGGGTTTCGAG	59.385	CTGTGTATTTGCAGCATTTGTCT	59.348	156
Kenaf-1457	CL2675.Contig10_All_1791_1	CT(2*6)	GAGAGAGTGCGTGAGAAACAAAT	59.942	TTATGGATTTTCAAGTTATGGCG	60.203	86
Kenaf-1458	CL2675.Contig10_All_1791_2	CT(2*6)	GAGAGAGTGCGTGAGAAACAAAT	59.942	GATTTTCAAGTTATGGCGGAGTA	59.533	81
Kenaf-1459	CL2675.Contig10_All_1791_3	CT(2*6)	GAGAGAGTGCGTGAGAAACAAAT	59.942	GCCAATGCCATAGCCTTATTATT	60.522	113
Kenaf-1460	CL2675.Contig10_All_1791_4	CT(2*6)	ATAAGTGGAGAGAGTGCGTGAGA	60.45	TCAAGTTATGGCGGAGTAGTAGC	59.826	83
Kenaf-1461	CL2675.Contig10_All_1791_5	CT(2*6)	ATAAGTGGAGAGAGTGCGTGAGA	60.45	TTATGGATTTTCAAGTTATGGCG	60.203	93
Kenaf-1462	CL2676.Contig1_All_1792_1	TCC(3*7)	CTATTCCTCCCGATCGAAGAC	60.046	CAAACATTTTTGGTGATGATGAA	59.728	106
Kenaf-1463	CL2676.Contig1_All_1792_2	TCC(3*7)	CTATTCCTCCCGATCGAAGAC	60.046	CTGCAAACATTTTTGGTGATGAT	61.106	109
Kenaf-1464	CL2676.Contig1_All_1792_3	TCC(3*7)	CTATTCCTCCCGATCGAAGAC	60.046	GCAAACATTTTTGGTGATGATG	60.23	107
Kenaf-1465	CL2676.Contig1_All_1792_4	TCC(3*7)	CTATTCCTCCCGATCGAAGAC	60.046	TGCAAACATTTTTGGTGATGAT	60.23	108
Kenaf-1466	CL2676.Contig1_All_1792_5	TCC(3*7)	CCATCATCGTCGCTATTCCT	60.059	CAAACATTTTTGGTGATGATGAA	59.728	118
Kenaf-1467	CL2699.Contig2_All_1794_1	GA(2*7)	GGAACTTTGTCACGTTGAGTACC	59.957	TGTCATTGATGGCAGAGTAACAC	60.052	126
Kenaf-1468	CL2699.Contig2_All_1794_2	GA(2*7)	TAACTCCATGGAACAAACAATCC	60.102	AATTCAGTTTTCACCCTCTCACA	60.026	129
Kenaf-1469	CL2699.Contig2_All_1794_3	GA(2*7)	CATGGAACAAACAATCCCATAAT	59.836	AATTCAGTTTTCACCCTCTCACA	60.026	123
Kenaf-1470	CL269.Contig1_All_263_1	GAA(3*5)	TGGATTTCGACGAGTACGAGTAT	60.035	CATCATCCTCTTCCTCCCTATTT	59.819	150
Kenaf-1471	CL269.Contig1_All_263_2	GAA(3*5)	TGGATTTCGACGAGTACGAGTAT	60.035	TCATCATCCTCTTCCTCCCTATT	60.284	151
Kenaf-1472	CL269.Contig1_All_263_3	GAA(3*5)	TGGATTTCGACGAGTACGAGTAT	60.035	TCCCTATTTCCATCTCTCTTCCT	59.586	136
Kenaf-1473	CL269.Contig1_All_263_4	GAA(3*5)	TGGATTTCGACGAGTACGAGTAT	60.035	CTCCCTATTTCCATCTCTCTTCC	59.586	137
Kenaf-1474	CL269.Contig1_All_263_5	GAA(3*5)	TGGATTTCGACGAGTACGAGTAT	60.035	CCTCCCTATTTCCATCTCTCTTC	59.586	138
Kenaf-1475	CL2725.Contig4_All_1797_1	GCA(3*5)	TCAGCTACTGCAGGTTCAGGATA	61.293	CCTGTTAGAATCTTTGTTGGCTG	60.169	159
Kenaf-1476	CL2725.Contig4_All_1797_2	GCA(3*5)	CAGCTACTGCAGGTTCAGGATA	59.54	CCTGTTAGAATCTTTGTTGGCTG	60.169	158
Kenaf-1477	CL2725.Contig4_All_1797_3	GCA(3*5)	ATCAGCTACTGCAGGTTCAGGAT	61.521	CCTGTTAGAATCTTTGTTGGCTG	60.169	160
Kenaf-1478	CL2725.Contig4_All_1797_4	GCA(3*5)	GTTCAGGATATACCGGTCCACAC	61.718	TCCACATGCCTGTTAGAATCTTT	60.014	154
Kenaf-1479	CL2725.Contig4_All_1797_5	GCA(3*5)	TCAGCTACTGCAGGTTCAGGATA	61.293	GAATCTTTGTTGGCTGAAATCAA	60.465	152
Kenaf-1480	CL2725.Contig4_All_1798_1	ATT(3*6)	ATGTGGATTTTGATCCCTGTAAA	59.601	TGATTAGGCTCATTTACCTCCAA	59.977	156
Kenaf-1481	CL2725.Contig4_All_1798_2	ATT(3*6)	ATGTGGATTTTGATCCCTGTAAA	59.601	TTGATTAGGCTCATTTACCTCCA	59.977	157
Kenaf-1482	CL2725.Contig4_All_1798_3	ATT(3*6)	ATGTGGATTTTGATCCCTGTAAA	59.601	ACCTCCAAAATGAACATGATTTG	60.102	141
Kenaf-1483	CL2725.Contig4_All_1798_4	ATT(3*6)	TTTGATTTCAGCCAACAAAGATT	59.997	AAAGTACAAGATCCCAAACAGCC	60.735	124
Kenaf-1484	CL2725.Contig4_All_1798_5	ATT(3*6)	AATTTGATTTCAGCCAACAAAGA	59.997	AAAGTACAAGATCCCAAACAGCC	60.735	126
Kenaf-1485	CL2761.Contig7_All_1818_5	GAG(3*6)	TGAAGAGGGAAAAGATGAAGATG	59.712	TTGATCACAATTCACAAAGCAAG	60.159	134
Kenaf-1486	CL2771.Contig4_All_1821_2	AAC(3*5)	CACAATCATCTTTACCCGTCAAC	60.637	ATTCAAAGAAAGTGGTCCGAAAT	60.224	122
Kenaf-1487	CL2771.Contig4_All_1821_4	AAC(3*5)	CACAATCATCTTTACCCGTCAAC	60.637	TCATGATTCAAAGAAAGTGGTCC	60.346	127
Kenaf-1488	CL2776.Contig2_All_1822_1	GAA(3*6)	ATTTTGGGTTGTTAGCTGTTGAA	59.926	TCAGCAGATTCTTGAACCTCTTC	60.012	124
Kenaf-1489	CL2776.Contig2_All_1822_2	GAA(3*6)	ATTTTGGGTTGTTAGCTGTTGAA	59.926	TTTTTGCCAAAGATCAAAACTGT	60.03	80
Kenaf-1490	CL2776.Contig2_All_1822_3	GAA(3*6)	CATCAAAGAGAAGAAACGGAAGA	59.879	TTTTTGCCAAAGATCAAAACTGT	60.03	150
Kenaf-1491	CL2776.Contig2_All_1822_4	GAA(3*6)	ATTTTGGGTTGTTAGCTGTTGAA	59.926	CACACCCTATATGCTGATTCCAT	60.109	151
Kenaf-1492	CL2776.Contig2_All_1822_5	GAA(3*6)	ATTTTGGGTTGTTAGCTGTTGAA	59.926	CTTTTTGCCAAAGATCAAAACTG	60.147	81
Kenaf-1493	CL2788.Contig1_All_1825_1	TCA(3*7)	ACAACAGATTGATGCCTTGAAAC	60.407	ACAACTGAAGAAGAAGGCAACAG	59.971	142
Kenaf-1494	CL2788.Contig1_All_1825_2	TCA(3*7)	ACAACAGATTGATGCCTTGAAAC	60.407	GAAACAACTGAAGAAGAAGGCAA	59.92	145
Kenaf-1495	CL2788.Contig1_All_1825_3	TCA(3*7)	ACAACAGATTGATGCCTTGAAAC	60.407	TGATGATGAGGTCAGAGTTGATG	60.126	88
Kenaf-1496	CL2788.Contig1_All_1825_4	TCA(3*7)	ACAACAGATTGATGCCTTGAAAC	60.407	ATGGATGATGATGAGGTCAGAGT	59.838	93
Kenaf-1497	CL2788.Contig1_All_1825_5	TCA(3*7)	ACAACAGATTGATGCCTTGAAAC	60.407	AACAACTGAAGAAGAAGGCAACA	60.321	143
Kenaf-1498	CL2790.Contig3_All_1826_1	TA(2*10)	TGTCAAGCTCTAGGACACATCAA	59.928	TGCAAATTCATGACTTGAAAAGA	59.75	157
Kenaf-1499	CL2790.Contig3_All_1826_2	TA(2*10)	CATGAACTTGTTATCCTGCGTTT	60.408	TGCAAATTCATGACTTGAAAAGA	59.75	101
Kenaf-1500	CL2790.Contig3_All_1826_3	TA(2*10)	CATCAAAATGACAAATGGGATTC	60.414	TGCAAATTCATGACTTGAAAAGA	59.75	140
Kenaf-1501	CL2790.Contig3_All_1826_4	TA(2*10)	AATGACAAATGGGATTCGGTAAT	60.643	TGCAAATTCATGACTTGAAAAGA	59.75	134
Kenaf-1502	CL2790.Contig3_All_1826_5	TA(2*10)	ATTCGGTAATTTGCCAAAATCAT	60.743	TGCAAATTCATGACTTGAAAAGA	59.75	121
Kenaf-1503	CL2813.Contig1_All_1830_1	CGT(3*5)	CTTGAATTTCTCCTCCATTTCCT	59.958	CGCCGACATAAAAGAAAACTATG	60.032	127
Kenaf-1504	CL2813.Contig1_All_1830_2	CGT(3*5)	TCGGGGTAAATGTAGATCTTGAA	59.851	CGCCGACATAAAAGAAAACTATG	60.032	144
Kenaf-1505	CL2813.Contig1_All_1830_3	CGT(3*5)	AATTTCTCCTCCATTTCCTTGAA	60.289	CGCCGACATAAAAGAAAACTATG	60.032	123
Kenaf-1506	CL2813.Contig1_All_1830_4	CGT(3*5)	TTGAATTTCTCCTCCATTTCCTT	60.289	CGCCGACATAAAAGAAAACTATG	60.032	126
Kenaf-1507	CL2813.Contig1_All_1830_5	CGT(3*5)	CTTGAATTTCTCCTCCATTTCCT	59.958	GTCGCCGACATAAAAGAAAACTA	59.692	129
Kenaf-1508	CL2831.Contig4_All_1832_1	CTCCA(5*4)	AAGGTTGTACAGACAGCTTCACC	59.734	TTATATCGAGAATGGGGTTGTTG	60.082	158
Kenaf-1509	CL2831.Contig4_All_1832_2	CTCCA(5*4)	AAGGTTGTACAGACAGCTTCACC	59.734	GTTGGCATCAAATTTATTCAGGA	60.194	139
Kenaf-1510	CL2831.Contig4_All_1832_3	CTCCA(5*4)	AAGGTTGTACAGACAGCTTCACC	59.734	TTGGCATCAAATTTATTCAGGAT	59.705	138
Kenaf-1511	CL2831.Contig4_All_1832_4	CTCCA(5*4)	AGCAGCGATATGCAACAAATAAG	60.629	TTATATCGAGAATGGGGTTGTTG	60.082	135
Kenaf-1512	CL2831.Contig4_All_1832_5	CTCCA(5*4)	AGCAGCGATATGCAACAAATAAG	60.629	GTTGGCATCAAATTTATTCAGGA	60.194	116
Kenaf-1513	CL2844.Contig10_All_1834_1	AGC(3*6)	TAATGTCGAATTACCGTTTGGTC	60.121	TTCTGGCTTGAGAAACATGAAAC	60.637	154
Kenaf-1514	CL2844.Contig10_All_1834_2	AGC(3*6)	TAATGTCGAATTACCGTTTGGTC	60.121	AGAAACATGAAACCCTGTAAGCC	60.735	144
Kenaf-1515	CL2844.Contig10_All_1834_3	AGC(3*6)	GTGGAAAAACATGTTGATTGTGA	59.761	TTCTGGCTTGAGAAACATGAAAC	60.637	108
Kenaf-1516	CL2844.Contig10_All_1834_4	AGC(3*6)	TAATGTCGAATTACCGTTTGGTC	60.121	CTTCTGGCTTGAGAAACATGAAA	60.755	155
Kenaf-1517	CL2844.Contig10_All_1834_5	AGC(3*6)	TGGAAAAACATGTTGATTGTGAA	60.25	TTCTGGCTTGAGAAACATGAAAC	60.637	107
Kenaf-1518	CL2844.Contig8_All_1833_1	GCT(3*6)	TTCTGGCTTGAGAAACATGAAAC	60.637	TAATGTCGAATTACCGTTTGGTC	60.121	154
Kenaf-1519	CL2844.Contig8_All_1833_2	GCT(3*6)	AGAAACATGAAACCCTGTAAGCC	60.735	TAATGTCGAATTACCGTTTGGTC	60.121	144
Kenaf-1520	CL2844.Contig8_All_1833_3	GCT(3*6)	TTCTGGCTTGAGAAACATGAAAC	60.637	GTGGAAAAACATGTTGATTGTGA	59.761	108
Kenaf-1521	CL2844.Contig8_All_1833_4	GCT(3*6)	CTTCTGGCTTGAGAAACATGAAA	60.755	TAATGTCGAATTACCGTTTGGTC	60.121	155
Kenaf-1522	CL2844.Contig8_All_1833_5	GCT(3*6)	TTCTGGCTTGAGAAACATGAAAC	60.637	TGGAAAAACATGTTGATTGTGAA	60.25	107
Kenaf-1523	CL284.Contig11_All_265_1	CTG(3*5)	GTTCTTTCTGTTCTTCCTCCTCC	59.759	ATATCAGGTTTTGGTGGTGTGTC	60.033	120
Kenaf-1524	CL284.Contig11_All_265_2	CTG(3*5)	GTTCTTTCTGTTCTTCCTCCTCC	59.759	GTGTGTCTTCCATTAAAAGCTGG	60.048	104
Kenaf-1525	CL284.Contig11_All_265_3	CTG(3*5)	GTTCTTTCTGTTCTTCCTCCTCC	59.759	GGTGTGTCTTCCATTAAAAGCTG	60.048	105
Kenaf-1526	CL284.Contig11_All_265_4	CTG(3*5)	GTTCTTTCTGTTCTTCCTCCTCC	59.759	GTGGTGTGTCTTCCATTAAAAGC	59.926	107
Kenaf-1527	CL284.Contig11_All_265_5	CTG(3*5)	GTTCTTTCTGTTCTTCCTCCTCC	59.759	GGTGGTGTGTCTTCCATTAAAAG	59.791	108
Kenaf-1528	CL2851.Contig2_All_1835_1	GAAA(4*6)	TGAAACTCTTCCTCATCATCTCC	59.705	TTTATAGGGCTCAACCTCAAAGA	59.298	100
Kenaf-1529	CL2851.Contig2_All_1835_2	GAAA(4*6)	TGAAACTCTTCCTCATCATCTCC	59.705	TCATAGAATCCATCATAGTCCCC	59.173	130
Kenaf-1530	CL2851.Contig2_All_1835_3	GAAA(4*6)	GAAACTCTTCCTCATCATCTCCC	60.441	TTTATAGGGCTCAACCTCAAAGA	59.298	99
Kenaf-1531	CL2851.Contig2_All_1835_4	GAAA(4*6)	ACTCTTCCTCATCATCTCCCAGT	60.505	TTTATAGGGCTCAACCTCAAAGA	59.298	96
Kenaf-1532	CL2851.Contig2_All_1835_5	GAAA(4*6)	GAAACTCTTCCTCATCATCTCCC	60.441	TCATAGAATCCATCATAGTCCCC	59.173	129
Kenaf-1533	CL2853.Contig3_All_1837_1	AAG(3*8)	GAGGAGTAGAAGGAAACATCGAA	58.904	TTTCCTGCTTTGCTTAACTTCAA	60.391	154
Kenaf-1534	CL2853.Contig3_All_1837_2	AAG(3*8)	AGAGGAGTAGAAGGAAACATCGAA	59.797	TTTCCTGCTTTGCTTAACTTCAA	60.391	155
Kenaf-1535	CL2853.Contig3_All_1837_3	AAG(3*8)	GAAGAGGAGTAGAAGGAAACATCG	59.797	TTTCCTGCTTTGCTTAACTTCAA	60.391	157
Kenaf-1536	CL2853.Contig3_All_1837_4	AAG(3*8)	GAGGAGTAGAAGGAAACATCGAAA	60.127	TTCCTGCTTTGCTTAACTTCAAT	59.465	153
Kenaf-1537	CL2853.Contig3_All_1837_5	AAG(3*8)	GAGGAGTAGAAGGAAACATCGAA	58.904	TGCTTTGCTTAACTTCAATGGAC	60.638	149
Kenaf-1538	CL2866.Contig2_All_1839_1	TTCTCC(6*4)	ATTTCAAAGTTTCTTCGTCCCTC	59.998	GAGGAAGGAGAGGATGCAAAG	60.334	129
Kenaf-1539	CL2866.Contig2_All_1839_2	TTCTCC(6*4)	CCACCTGATCAGATTATTTCCAG	59.843	GAGGAAGGAGAGGATGCAAAG	60.334	155
Kenaf-1540	CL2866.Contig2_All_1839_3	TTCTCC(6*4)	TCTTCGTCCCTCAACTATTATGG	59.51	GAGGAAGGAGAGGATGCAAAG	60.334	118
Kenaf-1541	CL2866.Contig2_All_1839_4	TTCTCC(6*4)	TTCCACCTGATCAGATTATTTCC	59.324	GAGGAAGGAGAGGATGCAAAG	60.334	157
Kenaf-1542	CL2866.Contig2_All_1839_5	TTCTCC(6*4)	TCCACCTGATCAGATTATTTCCA	60.678	GAGGAAGGAGAGGATGCAAAG	60.334	156
Kenaf-1543	CL2866.Contig6_All_1842_1	GGAGAA(6*4)	AGAGAGGGAGGAAGGAGAGGAT	61.054	TAAAGGGTCAACTTTGTTGCTTC	59.695	134
Kenaf-1544	CL2866.Contig6_All_1842_2	GGAGAA(6*4)	AGAGAGGGAGGAAGGAGAGGAT	61.054	TCTTAAAGGGTCAACTTTGTTGC	59.695	137
Kenaf-1545	CL2866.Contig6_All_1842_3	GGAGAA(6*4)	AGAGAGGGAGGAAGGAGAGGAT	61.054	CCAGCTCCAAATACCTATGTTCA	60.369	99
Kenaf-1546	CL2866.Contig6_All_1842_4	GGAGAA(6*4)	GAGAGGGAGGAAGGAGAGGAT	60.161	TAAAGGGTCAACTTTGTTGCTTC	59.695	133
Kenaf-1547	CL2866.Contig6_All_1842_5	GGAGAA(6*4)	GAGAGGGAGGAAGGAGAGGAT	60.161	TCTTAAAGGGTCAACTTTGTTGC	59.695	136
Kenaf-1548	CL2867.Contig2_All_1843_1	TC(2*8)	GAGCAAATGTACAATCGATGTCTC	60.034	CAATAGTTTCATATGGGCCTCTG	59.871	137
Kenaf-1549	CL2867.Contig2_All_1843_2	TC(2*8)	GTACAATCGATGTCTCGGGATCT	61.589	CAATAGTTTCATATGGGCCTCTG	59.871	129
Kenaf-1550	CL2867.Contig2_All_1843_3	TC(2*8)	CAAATGTACAATCGATGTCTCGG	61.619	CAATAGTTTCATATGGGCCTCTG	59.871	134
Kenaf-1551	CL2867.Contig2_All_1843_4	TC(2*8)	AGCAAATGTACAATCGATGTCTC	58.277	CAATAGTTTCATATGGGCCTCTG	59.871	136
Kenaf-1552	CL2867.Contig2_All_1843_5	TC(2*8)	GCAAATGTACAATCGATGTCTCG	61.756	CAATAGTTTCATATGGGCCTCTG	59.871	135
Kenaf-1553	CL2867.Contig5_All_1844_1	AG(2*8)	CAATAGTTTCATATGGGCCTCTG	59.871	GAGCAAATGTACAATCGATGTCTC	60.034	137
Kenaf-1554	CL2867.Contig5_All_1844_2	AG(2*8)	CAATAGTTTCATATGGGCCTCTG	59.871	GTACAATCGATGTCTCGGGATCT	61.589	129
Kenaf-1555	CL2867.Contig5_All_1844_3	AG(2*8)	CAATAGTTTCATATGGGCCTCTG	59.871	CAAATGTACAATCGATGTCTCGG	61.619	134
Kenaf-1556	CL2867.Contig5_All_1844_4	AG(2*8)	CAATAGTTTCATATGGGCCTCTG	59.871	AGCAAATGTACAATCGATGTCTC	58.277	136
Kenaf-1557	CL2867.Contig5_All_1844_5	AG(2*8)	CAATAGTTTCATATGGGCCTCTG	59.871	GCAAATGTACAATCGATGTCTCG	61.756	135
Kenaf-1558	CL2867.Contig6_All_1845_1	CCG(3*6)	AAAAGACCCAGTTTCAAAAGCTC	60.153	TCGGATCATTCTTCTCCTTTACA	60.082	108
Kenaf-1559	CL2867.Contig6_All_1845_2	CCG(3*6)	CATAATTGGGATAATCCTGCTGA	60.175	TCGGATCATTCTTCTCCTTTACA	60.082	85
Kenaf-1560	CL2867.Contig6_All_1845_3	CCG(3*6)	TCAAAAGCTCCATAATTGGGATA	59.824	TCGGATCATTCTTCTCCTTTACA	60.082	95
Kenaf-1561	CL2867.Contig6_All_1845_4	CCG(3*6)	GAAATTCGTATGCATAAACCCAC	59.642	TCGGATCATTCTTCTCCTTTACA	60.082	135
Kenaf-1562	CL2867.Contig6_All_1845_5	CCG(3*6)	CAAAAGCTCCATAATTGGGATAA	59.387	TCGGATCATTCTTCTCCTTTACA	60.082	94
Kenaf-1563	CL2873.Contig1_All_1846_1	GAGC(4*5)	GAAGGCAAACGTTCTTAGTCTCA	59.941	TGAACTTTTCCATTCTTTCCATT	59.026	151
Kenaf-1564	CL2873.Contig1_All_1846_2	GAGC(4*5)	GAAGGCAAACGTTCTTAGTCTCA	59.941	AATGAACTTTTCCATTCTTTCCA	59.026	153
Kenaf-1565	CL2873.Contig1_All_1846_3	GAGC(4*5)	GAAGGCAAACGTTCTTAGTCTCA	59.941	CAATGAACTTTTCCATTCTTTCC	59.026	154
Kenaf-1566	CL2873.Contig1_All_1846_4	GAGC(4*5)	GAAGGCAAACGTTCTTAGTCTCA	59.941	TTTCCATTCTTTCCATTTTCTCTC	59.956	145
Kenaf-1567	CL2873.Contig1_All_1846_5	GAGC(4*5)	GAAGGCAAACGTTCTTAGTCTCA	59.941	TGAACTTTTCCATTCTTTCCATTT	60.208	151
Kenaf-1568	CL2879.Contig4_All_1855_1	CT(2*6)	CCCATCGTCAGACATCATCTAAT	60.222	CAGTGTTCATTTCCTTTTTGGTC	59.9	157
Kenaf-1569	CL2879.Contig4_All_1855_2	CT(2*6)	CCCATCGTCAGACATCATCTAAT	60.222	GTGTTCATTTCCTTTTTGGTCCT	60.594	155
Kenaf-1570	CL2879.Contig4_All_1855_3	CT(2*6)	CCCATCGTCAGACATCATCTAAT	60.222	AGTGTTCATTTCCTTTTTGGTCC	60.594	156
Kenaf-1571	CL2879.Contig4_All_1855_4	CT(2*6)	CCCATCGTCAGACATCATCTAAT	60.222	TTTGGTCCTGCAGATGGTATTTA	60.706	141
Kenaf-1572	CL2879.Contig4_All_1855_5	CT(2*6)	CCCATCGTCAGACATCATCTAA	59.955	CAGTGTTCATTTCCTTTTTGGTC	59.9	157
Kenaf-1573	CL2896.Contig4_All_1866_1	CTC(3*5)	AACTCAGAGTATCACCACCATGC	60.438	GAATCTGCATATATCGCACAACA	60.006	151
Kenaf-1574	CL2896.Contig4_All_1866_2	CTC(3*5)	AACTCAGAGTATCACCACCATGC	60.438	AATCTGCATATATCGCACAACAG	59.182	150
Kenaf-1575	CL2896.Contig4_All_1866_3	CTC(3*5)	AACTCAGAGTATCACCACCATGC	60.438	CCTTTGGATCATCTTTCTCATTC	59.081	105
Kenaf-1576	CL2896.Contig4_All_1866_4	CTC(3*5)	AACTCAGAGTATCACCACCATGC	60.438	TCCTTTGGATCATCTTTCTCATT	59.081	106
Kenaf-1577	CL2896.Contig4_All_1866_5	CTC(3*5)	AACTCAGAGTATCACCACCATGC	60.438	ATCTTTCTCATTCTTTTTGCAGC	59.073	95
Kenaf-1578	CL2899.Contig2_All_1868_1	TGC(3*5)	TGAGATAGTGGGAGAGCAAGAAG	60.026	GTGTCCTTAAATATCCATTGGGG	60.634	133
Kenaf-1579	CL2899.Contig2_All_1868_2	TGC(3*5)	AAATGATCGATGCCTTTGAGATA	59.949	GTGTCCTTAAATATCCATTGGGG	60.634	149
Kenaf-1580	CL2899.Contig2_All_1868_3	TGC(3*5)	TGAGATAGTGGGAGAGCAAGAAG	60.026	GCCGATGCTAAGTGTCCTTAAAT	60.824	144
Kenaf-1581	CL2899.Contig2_All_1868_4	TGC(3*5)	AAATGATCGATGCCTTTGAGATA	59.949	GCCGATGCTAAGTGTCCTTAAAT	60.824	160
Kenaf-1582	CL2899.Contig2_All_1868_5	TGC(3*5)	TTGAGATAGTGGGAGAGCAAGAA	60.379	GTGTCCTTAAATATCCATTGGGG	60.634	134
Kenaf-1583	CL289.Contig1_All_270_1	TAA(3*5)	CCATCTCACTTACCACAGGAGTT	59.556	CCGTTTGTATGGCTTGTAATGTT	60.173	118
Kenaf-1584	CL289.Contig1_All_270_2	TAA(3*5)	CCATCTCACTTACCACAGGAGTT	59.556	TAATTAGTGCGATAAATCGTGGC	60.349	140
Kenaf-1585	CL289.Contig1_All_270_3	TAA(3*5)	GAATTACCATTGGGAGAAAATCG	60.855	CCGTTTGTATGGCTTGTAATGTT	60.173	150
Kenaf-1586	CL289.Contig1_All_270_4	TAA(3*5)	CGAATTACCATTGGGAGAAAATC	60.855	CCGTTTGTATGGCTTGTAATGTT	60.173	151
Kenaf-1587	CL289.Contig1_All_270_5	TAA(3*5)	CCATCTCACTTACCACAGGAGTT	59.556	GGCTTGTAATGTTCAGCTGTGTT	60.586	108
Kenaf-1588	CL2912.Contig1_All_1870_1	AT(2*8)	AGAGACACATTTTTATTCCTGCG	59.68	ATTTCAATTGACGATCATGGTG	59.691	160
Kenaf-1589	CL2912.Contig1_All_1870_2	AT(2*8)	GAGACACATTTTTATTCCTGCGT	59.557	ATTTCAATTGACGATCATGGTG	59.691	159
Kenaf-1590	CL2912.Contig1_All_1870_3	AT(2*8)	CACCACTCTGAAGATACCAAAACA	60.436	TAAAGAAGAAAGCCTCAGCAACA	60.525	157
Kenaf-1591	CL2912.Contig1_All_1870_4	AT(2*8)	CACCACTCTGAAGATACCAAAACA	60.436	AAAGAAGAAAGCCTCAGCAACAT	60.753	156
Kenaf-1592	CL2912.Contig1_All_1870_5	AT(2*8)	CACCACTCTGAAGATACCAAAACA	60.436	TTAAAGAAGAAAGCCTCAGCAAC	59.236	158
Kenaf-1593	CL2912.Contig1_All_1871_1	CAC(3*5)	TGTTGCTGAGGCTTTCTTCTTTA	60.525	ACGTCCAATATTAGGCCAACAG	60.257	142
Kenaf-1594	CL2912.Contig1_All_1871_2	CAC(3*5)	AGGTCTGGAATAGCTGTGCAAC	60.69	GTTGGATATCTCAAGGACACCAG	59.878	143
Kenaf-1595	CL2912.Contig1_All_1871_3	CAC(3*5)	AGGTCTGGAATAGCTGTGCAAC	60.69	AGTTGGATATCTCAAGGACACCA	59.878	144
Kenaf-1596	CL2912.Contig1_All_1871_4	CAC(3*5)	GGCTTTCTTCTTTAACCATTTGA	58.851	ATCCAACCAGCATAACCTTCTTC	60.707	159
Kenaf-1597	CL2912.Contig1_All_1871_5	CAC(3*5)	AGGTCTGGAATAGCTGTGCAAC	60.69	ACAGCTCAGATGTGAAGTTGGAT	60.189	159
Kenaf-1598	CL2919.Contig1_All_1872_1	CAT(3*5)	ACGAGCAATGATAACTCTTTCCA	60.143	AAAGGAAGCAGCAAGGTTAGAAG	60.406	156
Kenaf-1599	CL2919.Contig1_All_1872_2	CAT(3*5)	CGAGCAATGATAACTCTTTCCAG	60.263	AAAGGAAGCAGCAAGGTTAGAAG	60.406	155
Kenaf-1600	CL2919.Contig1_All_1872_3	CAT(3*5)	ACGAGCAATGATAACTCTTTCCA	60.143	AAAAGGAAGCAGCAAGGTTAGAA	60.725	157
Kenaf-1601	CL2919.Contig1_All_1872_4	CAT(3*5)	ACGAGCAATGATAACTCTTTCCA	60.143	AAAAAGGAAGCAGCAAGGTTAGA	60.725	158
Kenaf-1602	CL2919.Contig1_All_1872_5	CAT(3*5)	ACGAGCAATGATAACTCTTTCCA	60.143	GAAAAAGGAAGCAGCAAGGTTAG	60.725	159
Kenaf-1603	CL2927.Contig5_All_1873_4	TCGATG(6*4)	GAAACCAAAGCCTTAAAATCTCC	59.536	GACTTTACCGTGCAAAACTTGTC	60.089	147
Kenaf-1604	CL2927.Contig5_All_1873_5	TCGATG(6*4)	GAAACCAAAGCCTTAAAATCTCC	59.536	GAGACTTTACCGTGCAAAACTTG	60.208	149
Kenaf-1605	CL2927.Contig7_All_1874_1	TCGATG(6*4)	CAAAACCTTCAAATCTCCTGATG	59.987	GACTTTACCGTGCAAAACTTGTC	60.089	142
Kenaf-1606	CL2927.Contig7_All_1874_2	TCGATG(6*4)	CAAAACCTTCAAATCTCCTGATG	59.987	GAGACTTTACCGTGCAAAACTTG	60.208	144
Kenaf-1607	CL2927.Contig7_All_1874_3	TCGATG(6*4)	GAAACCAAAACCTTCAAATCTCC	60.205	GACTTTACCGTGCAAAACTTGTC	60.089	147
Kenaf-1608	CL2927.Contig7_All_1874_5	TCGATG(6*4)	GAAACCAAAACCTTCAAATCTCC	60.205	GAGACTTTACCGTGCAAAACTTG	60.208	149
Kenaf-1609	CL2927.Contig9_All_1875_1	GCT(3*5)	CTTGTTCCCCATTCTTTCTTCC	61.149	ATTTCCTGGAATTGGAGAGTTTC	59.839	99
Kenaf-1610	CL2927.Contig9_All_1875_2	GCT(3*5)	CTTGTTCCCCATTCTTTCTTCC	61.149	GAAATTTCCTGGAATTGGAGAGT	59.839	102
Kenaf-1611	CL2927.Contig9_All_1875_3	GCT(3*5)	CTTGTTCCCCATTCTTTCTTCC	61.149	GGAATTGGAGAGTTTCAGTGCTA	59.776	92
Kenaf-1612	CL2927.Contig9_All_1875_4	GCT(3*5)	GCTTGTTCCCCATTCTTTCTTC	61.283	ATTTCCTGGAATTGGAGAGTTTC	59.839	100
Kenaf-1613	CL2927.Contig9_All_1875_5	GCT(3*5)	GCTTGTTCCCCATTCTTTCTTC	61.283	GAAATTTCCTGGAATTGGAGAGT	59.839	103
Kenaf-1614	CL2927.Contig9_All_1876_1	CATCGA(6*4)	GACTTTACCGTGCAAAACTTGTC	60.089	CAAAACCTTCAAATCTCCTGATG	59.987	142
Kenaf-1615	CL2927.Contig9_All_1876_2	CATCGA(6*4)	GAGACTTTACCGTGCAAAACTTG	60.208	CAAAACCTTCAAATCTCCTGATG	59.987	144
Kenaf-1616	CL2927.Contig9_All_1876_3	CATCGA(6*4)	GACTTTACCGTGCAAAACTTGTC	60.089	GAAACCAAAACCTTCAAATCTCC	60.205	147
Kenaf-1617	CL2927.Contig9_All_1876_4	CATCGA(6*4)	GACTTTACCGTGCAAAACTTGTC	60.089	TCTCCTGATGATTTCTTAGGCAC	59.739	129
Kenaf-1618	CL2927.Contig9_All_1876_5	CATCGA(6*4)	GAGACTTTACCGTGCAAAACTTG	60.208	GAAACCAAAACCTTCAAATCTCC	60.205	149
Kenaf-1619	CL2931.Contig1_All_1878_1	TGA(3*6)	GTAGGAGAAGCTCGTTTGGTTTT	60.172	ATTTGCCCACTTCCAAAGTATCT	60.243	149
Kenaf-1620	CL2931.Contig1_All_1878_2	TGA(3*6)	GTAGGAGAAGCTCGTTTGGTTTT	60.172	AAGTATCTTTCCCAATTCCCTTG	59.74	134
Kenaf-1621	CL2931.Contig1_All_1878_3	TGA(3*6)	GTAGGAGAAGCTCGTTTGGTTTT	60.172	CAAAGTATCTTTCCCAATTCCCT	59.74	136
Kenaf-1622	CL2931.Contig1_All_1878_4	TGA(3*6)	TCTTGGAGCTTCTGTATCTTTGG	59.9	GGCTTCTTCATTGATGAGTGATT	59.612	140
Kenaf-1623	CL2932.Contig4_All_1882_1	GA(2*6)	TCTTTTCTGGGGTTTGCTTAAAT	60.331	TATGTGAACCAACAAACAACCAA	60.172	159
Kenaf-1624	CL2932.Contig4_All_1882_2	GA(2*6)	TCTTTTCTGGGGTTTGCTTAAAT	60.331	TTATGTGAACCAACAAACAACCA	60.172	160
Kenaf-1625	CL2932.Contig4_All_1882_3	GA(2*6)	TCTTTTCTGGGGTTTGCTTAAAT	60.331	ACCAACAAACAACCAAAGATCAA	60.647	152
Kenaf-1626	CL2932.Contig4_All_1882_4	GA(2*6)	TCTTTTCTGGGGTTTGCTTAAAT	60.331	AACCAACAAACAACCAAAGATCA	60.647	153
Kenaf-1627	CL2932.Contig4_All_1882_5	GA(2*6)	TCTTTTCTGGGGTTTGCTTAAAT	60.331	TGAACCAACAAACAACCAAAGAT	60.647	155
Kenaf-1628	CL2950.Contig4_All_1884_1	CAAAAG(6*4)	CTGTTGATCAATGGTGTTTCCTT	60.268	AAGTCGATGAAGAAGCCATTACA	60.143	104
Kenaf-1629	CL2950.Contig4_All_1884_3	CAAAAG(6*4)	CTGTTGATCAATGGTGTTTCCTT	60.268	CGATGAAGAAGCCATTACAGTCT	59.797	100
Kenaf-1630	CL2950.Contig4_All_1884_4	CAAAAG(6*4)	CTGTTGATCAATGGTGTTTCCTT	60.268	AGTCGATGAAGAAGCCATTACAG	59.797	103
Kenaf-1631	CL2954.Contig4_All_1885_1	CAT(3*6)	GGATAATCAATTTCATGAGCCAG	59.821	ACCCAAATGAGTATTGGGACTCT	60.122	112
Kenaf-1632	CL2954.Contig4_All_1885_2	CAT(3*6)	GGATAATCAATTTCATGAGCCAG	59.821	GCTACCATTGGTGATGGATTAAG	59.75	149
Kenaf-1633	CL2954.Contig4_All_1885_3	CAT(3*6)	TCAATAGGTTGCCTCATGTATCC	60.218	GCTACCATTGGTGATGGATTAAG	59.75	110
Kenaf-1634	CL2954.Contig4_All_1885_4	CAT(3*6)	GGATAATCAATTTCATGAGCCAG	59.821	CCAAATGAGTATTGGGACTCTGA	60.359	110
Kenaf-1635	CL2954.Contig4_All_1885_5	CAT(3*6)	GGATAATCAATTTCATGAGCCAG	59.821	ACCATTGGTGATGGATTAAGTGA	60.477	146
Kenaf-1636	CL2954.Contig5_All_1886_1	ATG(3*6)	ACCCAAATGAGTATTGGGACTCT	60.122	GGATAATCAATTTCATGAGCCAG	59.821	112
Kenaf-1637	CL2954.Contig5_All_1886_2	ATG(3*6)	GCTACCATTGGTGATGGATTAAG	59.75	GGATAATCAATTTCATGAGCCAG	59.821	149
Kenaf-1638	CL2954.Contig5_All_1886_3	ATG(3*6)	GCTACCATTGGTGATGGATTAAG	59.75	TCAATAGGTTGCCTCATGTATCC	60.218	110
Kenaf-1639	CL2954.Contig6_All_1887_4	ATG(3*6)	TGAGTGAATCTGTTGATTATGCG	60.145	GGATAATCAATTTCATGAGCCAG	59.821	130
Kenaf-1640	CL2954.Contig7_All_1888_1	TCT(3*5)	CACATTGCAAATTTTTCAGGAAT	60.226	GATCCAGACACAGCACTAGAAGC	60.459	153
Kenaf-1641	CL2954.Contig7_All_1888_2	TCT(3*5)	AAACACATTGCAAATTTTTCAGG	60.257	GATCCAGACACAGCACTAGAAGC	60.459	156
Kenaf-1642	CL2954.Contig7_All_1888_3	TCT(3*5)	CACATTGCAAATTTTTCAGGAAT	60.226	TGCTATAGATCCAGACACAGCAC	59.42	160
Kenaf-1643	CL2954.Contig7_All_1888_4	TCT(3*5)	CACATTGCAAATTTTTCAGGAAT	60.226	CCAGACACAGCACTAGAAGCAAT	60.855	150
Kenaf-1644	CL2954.Contig7_All_1888_5	TCT(3*5)	AAACACATTGCAAATTTTTCAGG	60.257	CCAGACACAGCACTAGAAGCAAT	60.855	153
Kenaf-1645	CL296.Contig1_All_271_1	GCG(3*5)	TAAACAACGCGATACTTGCTTTC	60.639	CTTCTCCAACAAGTCCCCTTC	60.096	156
Kenaf-1646	CL296.Contig1_All_271_2	GCG(3*5)	CACTAGATTCGGAGGGAGAGG	60.211	GATCCGACATCCTTCTTCAAAC	59.947	156
Kenaf-1647	CL296.Contig1_All_271_3	GCG(3*5)	AGCACTAGATTCGGAGGGAGAG	61.238	GATCCGACATCCTTCTTCAAAC	59.947	158
Kenaf-1648	CL296.Contig1_All_271_4	GCG(3*5)	GCACTAGATTCGGAGGGAGAG	60.355	GATCCGACATCCTTCTTCAAAC	59.947	157
Kenaf-1649	CL296.Contig1_All_271_5	GCG(3*5)	AGCACTAGATTCGGAGGGAGA	60.355	GATCCGACATCCTTCTTCAAAC	59.947	158
Kenaf-1650	CL2976.Contig1_All_1890_1	GTTT(4*5)	TGCCAAATGACAGAATAAGGAAT	59.857	CTGCAAGAAATGGAACAATTTGA	61.325	146
Kenaf-1651	CL2976.Contig1_All_1890_2	GTTT(4*5)	ATGCCAAATGACAGAATAAGGAA	59.857	CTGCAAGAAATGGAACAATTTGA	61.325	147
Kenaf-1652	CL2976.Contig1_All_1890_3	GTTT(4*5)	AATTTGATGCCAAATGACAGAAT	59.735	CTGCAAGAAATGGAACAATTTGA	61.325	153
Kenaf-1653	CL2976.Contig1_All_1890_4	GTTT(4*5)	TGCCAAATGACAGAATAAGGAAT	59.857	TGCAAGAAATGGAACAATTTGA	60.468	145
Kenaf-1654	CL2976.Contig1_All_1890_5	GTTT(4*5)	ATGCCAAATGACAGAATAAGGAA	59.857	TGCAAGAAATGGAACAATTTGA	60.468	146
Kenaf-1655	CL297.Contig2_All_272_1	CGAGGT(6*4)	GTCATCAAGTCGTGGAAGAAAAC	60.033	ACCTGAATCAAGCAACTATGGAA	60.014	146
Kenaf-1656	CL297.Contig2_All_272_2	CGAGGT(6*4)	GTCATCAAGTCGTGGAAGAAAAC	60.033	CTGAATCAAGCAACTATGGAAGG	60.136	144
Kenaf-1657	CL297.Contig2_All_272_3	CGAGGT(6*4)	GTCATCAAGTCGTGGAAGAAAAC	60.033	CCTGAATCAAGCAACTATGGAAG	60.136	145
Kenaf-1658	CL297.Contig2_All_272_4	CGAGGT(6*4)	GTCATCAAGTCGTGGAAGAAAAC	60.033	TCGTGTCTCCACTCGATCTTATT	60.144	120
Kenaf-1659	CL297.Contig2_All_272_5	CGAGGT(6*4)	GTCATCAAGTCGTGGAAGAAAAC	60.033	AACAACAATCAGTTAAGATCGCC	59.557	97
Kenaf-1660	CL2985.Contig2_All_1891_1	TCT(3*5)	TTCTTTCCTCTCTCCCTCTTCTC	59.608	AAGTACTCCAATCATCCCCATCT	60.089	134
Kenaf-1661	CL2985.Contig2_All_1891_4	TCT(3*5)	TTCTTTCCTCTCTCCCTCTTCTC	59.608	ACTTCCCTTCATTCTCAAGCTCT	59.908	110
Kenaf-1662	CL2985.Contig2_All_1891_5	TCT(3*5)	TCTCTCCCTTTCTTTCCTCTCTC	59.608	ACTTCCCTTCATTCTCAAGCTCT	59.908	119
Kenaf-1663	CL2985.Contig3_All_1892_1	AGA(3*5)	AAGTACTCCAATCATCCCCATCT	60.089	TTCTTTCCTCTCTCCCTCTTCTC	59.608	134
Kenaf-1664	CL2985.Contig3_All_1892_2	AGA(3*5)	AAGTACTCCAATCATCCCCATCT	60.089	TCTCTCCCTTTCTTTCCTCTCTC	59.608	143
Kenaf-1665	CL2985.Contig3_All_1892_4	AGA(3*5)	ACTTCCCTTCATTCTCAAGCTCT	59.908	TTCTTTCCTCTCTCCCTCTTCTC	59.608	110
Kenaf-1666	CL2985.Contig3_All_1892_5	AGA(3*5)	ACTTCCCTTCATTCTCAAGCTCT	59.908	TCTCTCCCTTTCTTTCCTCTCTC	59.608	119
Kenaf-1667	CL2988.Contig1_All_1893_1	TGA(3*5)	ATCTTGCTGATAATCGAGCTGAA	60.365	AAGAAGACGACTTTCATCACCAC	59.674	134
Kenaf-1668	CL2988.Contig1_All_1893_2	TGA(3*5)	ATCTTGCTGATAATCGAGCTGAA	60.365	GAAGACGACTTTCATCACCACAT	60.417	132
Kenaf-1669	CL2988.Contig1_All_1893_3	TGA(3*5)	GATAATCGAGCTGAATGTGAGGA	60.596	AAGAAGACGACTTTCATCACCAC	59.674	126
Kenaf-1670	CL2988.Contig1_All_1893_4	TGA(3*5)	ATCTTGCTGATAATCGAGCTGAA	60.365	TCAAGAAGACGACTTTCATCACC	60.655	136
Kenaf-1671	CL2988.Contig1_All_1893_5	TGA(3*5)	ATCTTGCTGATAATCGAGCTGAA	60.365	GTACGAGAAGACCATCCGCTATT	60.847	160
Kenaf-1672	CL2988.Contig3_All_1896_1	TCA(3*5)	AAGAAGACGACTTTCATCACCAC	59.674	ATCTTGCTGATAATCGAGCTGAA	60.365	134
Kenaf-1673	CL2988.Contig3_All_1896_2	TCA(3*5)	GAAGACGACTTTCATCACCACAT	60.417	ATCTTGCTGATAATCGAGCTGAA	60.365	132
Kenaf-1674	CL2988.Contig3_All_1896_3	TCA(3*5)	AAGAAGACGACTTTCATCACCAC	59.674	GATAATCGAGCTGAATGTGAGGA	60.596	126
Kenaf-1675	CL2988.Contig3_All_1896_4	TCA(3*5)	TCAAGAAGACGACTTTCATCACC	60.655	ATCTTGCTGATAATCGAGCTGAA	60.365	136
Kenaf-1676	CL2988.Contig3_All_1896_5	TCA(3*5)	GTACGAGAAGACCATCCGCTATT	60.847	ATCTTGCTGATAATCGAGCTGAA	60.365	160
Kenaf-1677	CL2988.Contig8_All_1898_1	CAA(3*5)	CCCCACTGTTAAGTGCTAATCAA	60.4	CAGATTTCTGATCAATCCCTTTG	59.952	159
Kenaf-1678	CL2988.Contig8_All_1898_2	CAA(3*5)	ATGAAAGTTGACATGTACCAGCC	60.296	GGAAAATGCAGATACAATGGAGA	60.326	157
Kenaf-1679	CL2988.Contig8_All_1898_3	CAA(3*5)	CCCCACTGTTAAGTGCTAATCAA	60.4	GGAAAATGCAGATACAATGGAGA	60.326	132
Kenaf-1680	CL2988.Contig8_All_1898_4	CAA(3*5)	CCCCACTGTTAAGTGCTAATCAA	60.4	TGCATAGGAAAATGCAGATACAA	59.637	138
Kenaf-1681	CL2988.Contig8_All_1898_5	CAA(3*5)	CCCCACTGTTAAGTGCTAATCAA	60.4	TTGCATAGGAAAATGCAGATACA	59.637	139
Kenaf-1682	CL298.Contig10_All_275_1	AT(2*7)	ATATAAACTGGCAGACCCATCAA	59.75	CAGGCTGGTTTTAGTACCACTTT	58.814	99
Kenaf-1683	CL298.Contig10_All_275_2	AT(2*7)	TATAAACTGGCAGACCCATCAAC	60.25	CAGGCTGGTTTTAGTACCACTTT	58.814	98
Kenaf-1684	CL298.Contig10_All_275_3	AT(2*7)	GACGACCCTAGCGTATACAATGA	60.397	CAGGCTGGTTTTAGTACCACTTT	58.814	154
Kenaf-1685	CL298.Contig10_All_275_4	AT(2*7)	AGACGACCCTAGCGTATACAATG	59.594	CAGGCTGGTTTTAGTACCACTTT	58.814	155
Kenaf-1686	CL298.Contig10_All_275_5	AT(2*7)	ATATAAACTGGCAGACCCATCAA	59.75	CCAGGCTGGTTTTAGTACCACT	59.581	100
Kenaf-1687	CL2993.Contig2_All_1900_1	TGT(3*5)	CCCAAATACTTGACCAGATCATT	59.255	AGATCCAACAGCCATAAAGATGA	59.979	131
Kenaf-1688	CL2993.Contig2_All_1900_2	TGT(3*5)	CCCAAATACTTGACCAGATCATT	59.255	GAGATCCAACAGCCATAAAGATG	59.979	132
Kenaf-1689	CL2993.Contig2_All_1900_3	TGT(3*5)	TTTCCCCAAATACTTGACCAGAT	60.906	AGATCCAACAGCCATAAAGATGA	59.979	135
Kenaf-1690	CL2993.Contig2_All_1900_4	TGT(3*5)	TTTCCCCAAATACTTGACCAGAT	60.906	GAGATCCAACAGCCATAAAGATG	59.979	136
Kenaf-1691	CL2993.Contig2_All_1900_5	TGT(3*5)	TTTCCCCAAATACTTGACCAGAT	60.906	TGAGATCCAACAGCCATAAAGAT	59.979	137
Kenaf-1692	CL3017.Contig18_All_1913_1	GTTTT(5*5)	GTGTTTAGTCAGCTTACGGTGGT	59.637	AGAAGAGGCCTTTAGGGTTTGTT	60.815	149
Kenaf-1693	CL3017.Contig18_All_1913_2	GTTTT(5*5)	GTGTTTAGTCAGCTTACGGTGGT	59.637	AAGAAGAGGCCTTTAGGGTTTGT	60.815	150
Kenaf-1694	CL3017.Contig18_All_1913_3	GTTTT(5*5)	GTGTTTAGTCAGCTTACGGTGGT	59.637	GGCCTTTAGGGTTTGTTCCTTAT	60.865	143
Kenaf-1695	CL3024.Contig3_All_1916_1	TGA(3*5)	TTGTTGTGAAAATTCGGTGTATG	59.787	GAGAGAAGCCTCTTCCGAATC	59.55	147
Kenaf-1696	CL3024.Contig3_All_1916_2	TGA(3*5)	TGTTGTGAAAATTCGGTGTATGT	59.303	GAGAGAAGCCTCTTCCGAATC	59.55	146
Kenaf-1697	CL3024.Contig3_All_1916_3	TGA(3*5)	TTGTTGTGAAAATTCGGTGTATG	59.787	AGAGAAGCCTCTTCCGAATCCT	62.012	146
Kenaf-1698	CL3024.Contig3_All_1916_4	TGA(3*5)	TGTTTGTTTGTTGTGAAAATTCG	59.933	AGAGAAGCCTCTTCCGAATCC	61.191	153
Kenaf-1699	CL3024.Contig3_All_1916_5	TGA(3*5)	TGTTTGTTTGTTGTGAAAATTCG	59.933	GAGAAGCCTCTTCCGAATCC	60.293	152
Kenaf-1700	CL3030.Contig1_All_1920_1	AAT(3*6)	GGGATCATTCCCTAAATCAATTC	59.882	CTTCGTTTATCTTAGGGTACGCA	59.707	124
Kenaf-1701	CL3030.Contig1_All_1920_2	AAT(3*6)	AATTGCTTTTCTGGATTTTAGGG	59.868	CTTCGTTTATCTTAGGGTACGCA	59.707	155
Kenaf-1702	CL3030.Contig1_All_1920_3	AAT(3*6)	GGATTTTAGGGTAAGAACAGGGA	59.74	CTTCGTTTATCTTAGGGTACGCA	59.707	143
Kenaf-1703	CL3030.Contig1_All_1920_4	AAT(3*6)	AATTGCTTTTCTGGATTTTAGGG	59.868	TCGTTTATCTTAGGGTACGCATC	59.553	153
Kenaf-1704	CL3030.Contig1_All_1920_5	AAT(3*6)	GGATTTTAGGGTAAGAACAGGGA	59.74	TCGTTTATCTTAGGGTACGCATC	59.553	141
Kenaf-1705	CL3040.Contig2_All_1922_1	TTG(3*5)	TGACAGGTTCCTCGAATCTAAAA	60.116	GTTTGACTGATGGGTTTTGGTTA	60.136	157
Kenaf-1706	CL3040.Contig2_All_1922_2	TTG(3*5)	TTTCTCGAACTCGTTGTTGATTT	60.156	TCCAATCTTGATTTGGTTTGACT	59.864	82
Kenaf-1707	CL3040.Contig2_All_1922_3	TTG(3*5)	TTTTCTCGAACTCGTTGTTGATT	60.156	TCCAATCTTGATTTGGTTTGACT	59.864	83
Kenaf-1708	CL3040.Contig2_All_1922_4	TTG(3*5)	TTTTTCTCGAACTCGTTGTTGAT	60.156	TCCAATCTTGATTTGGTTTGACT	59.864	84
Kenaf-1709	CL3040.Contig2_All_1922_5	TTG(3*5)	GAGTGACAGGTTCCTCGAATCTA	59.765	GTTTGACTGATGGGTTTTGGTTA	60.136	160
Kenaf-1710	CL3047.Contig1_All_1923_1	GAG(3*5)	GGACTGATTCGTAATTTCACCAG	59.885	AAGTCCTCCTTTTCCGCTCTT	60.718	143
Kenaf-1711	CL3047.Contig1_All_1923_2	GAG(3*5)	AGGACTGATTCGTAATTTCACCA	59.885	AAGTCCTCCTTTTCCGCTCTT	60.718	144
Kenaf-1712	CL3047.Contig1_All_1923_3	GAG(3*5)	CCAAGGACTGATTCGTAATTTCA	60.35	AAGTCCTCCTTTTCCGCTCTT	60.718	147
Kenaf-1713	CL3047.Contig1_All_1923_4	GAG(3*5)	GGACTGATTCGTAATTTCACCAG	59.885	AGTCCTCCTTTTCCGCTCTTC	61.217	142
Kenaf-1714	CL3047.Contig1_All_1923_5	GAG(3*5)	AGGACTGATTCGTAATTTCACCA	59.885	AGTCCTCCTTTTCCGCTCTTC	61.217	143
Kenaf-1715	CL304.Contig15_All_277_1	AG(2*11)	ATGATAGTTGGGTGTTGAACCTG	60.158	GGAAACCAAAGAAAGGTGAAGAG	60.482	96
Kenaf-1716	CL304.Contig15_All_277_2	AG(2*11)	CATGATAGTTGGGTGTTGAACCT	60.158	GGAAACCAAAGAAAGGTGAAGAG	60.482	97
Kenaf-1717	CL304.Contig15_All_277_3	AG(2*11)	CACCATAACCTTGGAAATCTTGA	60.223	GGAAACCAAAGAAAGGTGAAGAG	60.482	158
Kenaf-1718	CL304.Contig15_All_277_4	AG(2*11)	ATCTTGAGCATGGCTAGAATGAA	60.238	GGAAACCAAAGAAAGGTGAAGAG	60.482	142
Kenaf-1719	CL304.Contig15_All_277_5	AG(2*11)	AATCTTGAGCATGGCTAGAATGA	60.238	GGAAACCAAAGAAAGGTGAAGAG	60.482	143
Kenaf-1720	CL304.Contig2_All_276_1	TC(2*11)	GGAAACCAAAGAAAGGTGAAGAG	60.482	ATGATAGTTGGGTGTTGAACCTG	60.158	96
Kenaf-1721	CL304.Contig2_All_276_2	TC(2*11)	GGAAACCAAAGAAAGGTGAAGAG	60.482	CATGATAGTTGGGTGTTGAACCT	60.158	97
Kenaf-1722	CL304.Contig2_All_276_3	TC(2*11)	GGAAACCAAAGAAAGGTGAAGAG	60.482	CACCATAACCTTGGAAATCTTGA	60.223	158
Kenaf-1723	CL304.Contig2_All_276_4	TC(2*11)	GGAAACCAAAGAAAGGTGAAGAG	60.482	ATCTTGAGCATGGCTAGAATGAA	60.238	142
Kenaf-1724	CL304.Contig2_All_276_5	TC(2*11)	GGAAACCAAAGAAAGGTGAAGAG	60.482	AATCTTGAGCATGGCTAGAATGA	60.238	143
Kenaf-1725	CL3059.Contig1_All_1926_1	AAG(3*5)	CAAAAATTTCAGAAACGAAATGG	59.872	GCTGGCTTGATGATATCTTCTTC	59.372	97
Kenaf-1726	CL3059.Contig1_All_1926_2	AAG(3*5)	CTGGATTTTTGGAAGCTTAATCA	59.632	TCTTCTTCATGATTCTGGGTTTC	59.585	134
Kenaf-1727	CL3059.Contig1_All_1926_3	AAG(3*5)	CAAAAATTTCAGAAACGAAATGG	59.872	TCTTCTTCTTCATGATTCTGGGT	59.227	82
Kenaf-1728	CL3059.Contig1_All_1926_4	AAG(3*5)	CAAAAATTTCAGAAACGAAATGG	59.872	TTCTTCTTCATGATTCTGGGTTT	59.123	80
Kenaf-1729	CL3059.Contig1_All_1926_5	AAG(3*5)	CAAAAATTTCAGAAACGAAATGG	59.872	CTTCTTCTTCATGATTCTGGGTTT	60.005	81
Kenaf-1730	CL3066.Contig2_All_1927_1	GAG(3*5)	TTGAAGAAGATGAAGAGGAAGCA	60.489	ACTCCTTCAAAGCCATCTCGT	60.261	154
Kenaf-1731	CL3066.Contig2_All_1927_2	GAG(3*5)	TGAAGAAGATGAAGAGGAAGCAG	60.137	TCTTGGAACTCCTTCAAAGCC	60.728	160
Kenaf-1732	CL3066.Contig2_All_1927_3	GAG(3*5)	TGAAGAAGATGAAGAGGAAGCAG	60.137	AACTCCTTCAAAGCCATCTCG	60.748	154
Kenaf-1733	CL3066.Contig2_All_1927_4	GAG(3*5)	TTGAAGAAGATGAAGAGGAAGCA	60.489	GGAACTCCTTCAAAGCCATCTC	61.449	157
Kenaf-1734	CL3066.Contig2_All_1927_5	GAG(3*5)	TGAAGAAGATGAAGAGGAAGCAG	60.137	CTTGGAACTCCTTCAAAGCCAT	61.813	159
Kenaf-1735	CL3067.Contig2_All_1928_1	GGC(3*6)	GATCTCAACATGGTGCTCAAAC	59.603	TGAACTCGTACTCCTGGACTGA	59.907	160
Kenaf-1736	CL3067.Contig2_All_1928_2	GGC(3*6)	CAAGTCTCCCCATCCTCCTT	60.447	GAGGTTGAAAGGGAAGGTGTAGT	59.922	117
Kenaf-1737	CL3067.Contig2_All_1928_3	GGC(3*6)	CAAGTCTCCCCATCCTCCTT	60.447	TTAATGCTGTTCTTCTTCTTGGC	59.912	143
Kenaf-1738	CL3067.Contig2_All_1928_4	GGC(3*6)	AAGTCTCCCCATCCTCCTTC	59.492	TTAATGCTGTTCTTCTTCTTGGC	59.912	142
Kenaf-1739	CL3067.Contig2_All_1928_5	GGC(3*6)	CAAGTCTCCCCATCCTCCTT	60.447	GGTTGAAAGGGAAGGTGTAGTTC	60.261	115
Kenaf-1740	CL3067.Contig6_All_1932_1	GGC(3*6)	AAGTCTCACCATCCTCCTTCAC	59.605	TGTTAGTACTGCCGCTCTTCTTC	60.089	147
Kenaf-1741	CL3067.Contig6_All_1932_2	GGC(3*6)	AAGTCTCACCATCCTCCTTCAC	59.605	TAGTACTGCCGCTCTTCTTCTTG	60.208	144
Kenaf-1742	CL3067.Contig6_All_1932_3	GGC(3*6)	AAGTCTCACCATCCTCCTTCAC	59.605	TTGTTAGTACTGCCGCTCTTCTT	59.631	148
Kenaf-1743	CL3067.Contig6_All_1932_4	GGC(3*6)	AAGTCTCACCATCCTCCTTCAC	59.605	TTCTTGTGGTTGAAACTGAAAGG	60.53	127
Kenaf-1744	CL3067.Contig6_All_1932_5	GGC(3*6)	AAGTCTCACCATCCTCCTTCAC	59.605	GTTGTTAGTACTGCCGCTCTTCT	59.167	149
Kenaf-1745	CL3067.Contig8_All_1933_2	AGG(3*7)	AGCTGAACTCGTACTCCTGGAC	59.945	GGTTGATCTCAACATGGTGCT	59.989	137
Kenaf-1746	CL3068.Contig3_All_1934_1	CTG(3*5)	TCAATGTTGACGTTTTGAAAAGA	59.655	ACCTTTGGTCCGATTTCAATAAT	59.968	142
Kenaf-1747	CL3068.Contig3_All_1934_2	CTG(3*5)	TCAATGTTGACGTTTTGAAAAGA	59.655	CTTTGGTCCGATTTCAATAATCA	60.187	140
Kenaf-1748	CL3068.Contig3_All_1934_3	CTG(3*5)	TCAATGTTGACGTTTTGAAAAGA	59.655	TTGGTCCGATTTCAATAATCAGT	59.729	138
Kenaf-1749	CL3068.Contig3_All_1934_4	CTG(3*5)	TCAATGTTGACGTTTTGAAAAGA	59.655	AGAACTCATGCTATGACCTTTGG	59.666	157
Kenaf-1750	CL3068.Contig3_All_1934_5	CTG(3*5)	TCAATGTTGACGTTTTGAAAAGA	59.655	GAACTCATGCTATGACCTTTGGT	59.539	156
Kenaf-1751	CL3079.Contig2_All_1935_1	AGA(3*5)	CAAGAAAATCTCACGTCTCAAGG	60.281	TACGTGCATCAAGAAAGCTACAA	59.96	157
Kenaf-1752	CL3079.Contig2_All_1935_2	AGA(3*5)	CAAGAAAATCTCACGTCTCAAGG	60.281	TCTAGTGCTACTTCTAATGCCCG	59.946	128
Kenaf-1753	CL3079.Contig2_All_1935_3	AGA(3*5)	CAAGAAAATCTCACGTCTCAAGG	60.281	GCATCAAGAAAGCTACAAATTGC	60.272	152
Kenaf-1754	CL3079.Contig2_All_1935_4	AGA(3*5)	CAAGAAAATCTCACGTCTCAAGG	60.281	TGGAAATTCATTTTCTTCTCCAG	59.596	96
Kenaf-1755	CL3079.Contig2_All_1935_5	AGA(3*5)	CAAGAAAATCTCACGTCTCAAGG	60.281	GTACGTGCATCAAGAAAGCTACA	59.482	158
Kenaf-1756	CL3079.Contig3_All_1936_1	TTC(3*5)	TCTAGTGCTACTTCTAATGCCCG	59.946	CAAGAAAATCTCACGTCTCAAGG	60.281	128
Kenaf-1757	CL3079.Contig3_All_1936_2	TTC(3*5)	GCATCAAGAAAGCTACAAATTGC	60.272	CAAGAAAATCTCACGTCTCAAGG	60.281	152
Kenaf-1758	CL3079.Contig3_All_1936_3	TTC(3*5)	TGGAAATTCATTTTCTTCTCCAG	59.596	CAAGAAAATCTCACGTCTCAAGG	60.281	96
Kenaf-1759	CL3079.Contig3_All_1936_4	TTC(3*5)	TCTAGTGCTACTTCTAATGCCCG	59.946	CCTCAAGAAAATCTCACGTCTCA	60.778	131
Kenaf-1760	CL3079.Contig3_All_1936_5	TTC(3*5)	CGTGCATCAAGAAAGCTACAAAT	60.657	CAAGAAAATCTCACGTCTCAAGG	60.281	155
Kenaf-1761	CL3088.Contig3_All_1937_1	AAATGA(6*4)	TAGGGTTAGCGTTAGGGTTTGAT	60.25	GAGAAGTAGCCTCACAGGCATT	59.913	159
Kenaf-1762	CL3088.Contig3_All_1937_2	AAATGA(6*4)	ATGGTAACGAGATTGATGTCGAG	60.387	CCAAACATTTCAACACCATTAAAA	60.019	154
Kenaf-1763	CL3088.Contig3_All_1937_3	AAATGA(6*4)	ATGGATGGTAACGAGATTGATGT	59.612	CCAAACATTTCAACACCATTAAAA	60.019	158
Kenaf-1764	CL3088.Contig3_All_1937_4	AAATGA(6*4)	ATGGTAACGAGATTGATGTCGAG	60.387	AAAATGAGAAGTAGCCTCACAGG	58.97	134
Kenaf-1765	CL3088.Contig3_All_1937_5	AAATGA(6*4)	ATGGATGGTAACGAGATTGATGT	59.612	AAAATGAGAAGTAGCCTCACAGG	58.97	138
Kenaf-1766	CL3088.Contig3_All_1938_1	TGA(3*5)	TGGAGATGATTATGGAATTGAGG	60.157	TATTATCCTCCAACTGAAGCGAA	60.102	128
Kenaf-1767	CL3088.Contig3_All_1938_2	TGA(3*5)	TGGAGATGATTATGGAATTGAGG	60.157	CCCAACGAAGTGGAATACTAACA	60.275	104
Kenaf-1768	CL3088.Contig3_All_1938_3	TGA(3*5)	TGGAGATGATTATGGAATTGAGG	60.157	TCTTCAGGGGTTTCCCTATTATC	59.705	144
Kenaf-1769	CL3088.Contig3_All_1938_4	TGA(3*5)	GACGATGAGATTGATAATCGGAC	59.818	CCCAACGAAGTGGAATACTAACA	60.275	148
Kenaf-1770	CL3088.Contig3_All_1938_5	TGA(3*5)	TGGAGATGATTATGGAATTGAGG	60.157	CCCTATTATCCTCCAACTGAAGC	60.327	131
Kenaf-1771	CL3094.Contig5_All_1939_1	CTT(3*6)	TTTCTCGTGCTGTGAAACCTTAT	60.176	GATTGCAAATCCATTAAGCAAAA	60.312	143
Kenaf-1772	CL3094.Contig5_All_1939_2	CTT(3*6)	ATTTCTCGTGCTGTGAAACCTTA	60.176	GATTGCAAATCCATTAAGCAAAA	60.312	144
Kenaf-1773	CL3094.Contig5_All_1939_3	CTT(3*6)	TTTCTCGTGCTGTGAAACCTTAT	60.176	CAAATCCATTAAGCAAAACGAAA	60.334	138
Kenaf-1774	CL3094.Contig5_All_1939_4	CTT(3*6)	ATTTCTCGTGCTGTGAAACCTTA	60.176	CAAATCCATTAAGCAAAACGAAA	60.334	139
Kenaf-1775	CL3094.Contig5_All_1939_5	CTT(3*6)	TTTCTCGTGCTGTGAAACCTTAT	60.176	TACAAGAATCCGAACTAAGGGCT	60.478	106
Kenaf-1776	CL3099.Contig5_All_1940_1	GAA(3*7)	GAGCCTGACATGACTTTGAACTT	59.809	AGACACAAATCTCCCTTCTTTCC	59.995	113
Kenaf-1777	CL3099.Contig5_All_1940_2	GAA(3*7)	TTGCAAGTAATGAATCCCTCTTC	59.622	AGACACAAATCTCCCTTCTTTCC	59.995	147
Kenaf-1778	CL3099.Contig5_All_1940_3	GAA(3*7)	GAGCCTGACATGACTTTGAACTT	59.809	CCTTCTTTCCCATTCTTCTCTTC	59.729	100
Kenaf-1779	CL3099.Contig5_All_1940_4	GAA(3*7)	GCAGCTTTTAGCTTTTGCAAGTA	60.208	CCTTCTTTCCCATTCTTCTCTTC	59.729	148
Kenaf-1780	CL3099.Contig5_All_1940_5	GAA(3*7)	AGAGCCTGACATGACTTTGAACT	59.447	AGACACAAATCTCCCTTCTTTCC	59.995	114
Kenaf-1781	CL3099.Contig6_All_1941_1	GAA(3*7)	GAGCCTGACATGACTTTGAACTT	59.809	GTTGAAACGATCTCCTTAGCCTT	60.14	83
Kenaf-1782	CL3099.Contig6_All_1941_2	GAA(3*7)	GCAGCTTTTAGCTTTTGCAAGTA	60.208	GTTGAAACGATCTCCTTAGCCTT	60.14	131
Kenaf-1783	CL3099.Contig6_All_1941_3	GAA(3*7)	TTGCAAGTAATGAATCCCTCTTC	59.622	GTTGAAACGATCTCCTTAGCCTT	60.14	117
Kenaf-1784	CL3099.Contig6_All_1941_4	GAA(3*7)	TCAGAAGGTATATTCGCAGCTTT	59.449	GTTGAAACGATCTCCTTAGCCTT	60.14	146
Kenaf-1785	CL3099.Contig6_All_1941_5	GAA(3*7)	AGAGCCTGACATGACTTTGAACT	59.447	GTTGAAACGATCTCCTTAGCCTT	60.14	84
Kenaf-1786	CL3103.Contig2_All_1946_1	AGAT(4*5)	GTGGAGCTGTGCTGGTATTAAGT	59.73	AATGATCAAGCAAGACTTTCTGC	59.912	145
Kenaf-1787	CL3103.Contig2_All_1946_2	AGAT(4*5)	TATAAACTCAATTACGGGGTGGA	59.632	AATGATCAAGCAAGACTTTCTGC	59.912	123
Kenaf-1788	CL3103.Contig2_All_1946_3	AGAT(4*5)	ATAAACTCAATTACGGGGTGGAG	60.459	AATGATCAAGCAAGACTTTCTGC	59.912	122
Kenaf-1789	CL3103.Contig2_All_1946_4	AGAT(4*5)	TATAAACTCAATTACGGGGTGGA	59.632	ATTCAAGAGAAGAAGAGGGTCGT	59.78	147
Kenaf-1790	CL3103.Contig2_All_1946_5	AGAT(4*5)	TATAAACTCAATTACGGGGTGGA	59.632	GCAGCAGATTCAAGAGAAGAAGA	60.276	154
Kenaf-1791	CL3105.Contig1_All_1947_1	TGG(3*5)	AAGCCTGTTCGATTTCTCTGATA	59.407	CAAGTAACAACGGGTCAGATTTC	59.92	140
Kenaf-1792	CL3105.Contig1_All_1947_2	TGG(3*5)	AAAGCCTGTTCGATTTCTCTGAT	60.603	CAAGTAACAACGGGTCAGATTTC	59.92	141
Kenaf-1793	CL3105.Contig1_All_1947_3	TGG(3*5)	TGTTCGATTTCTCTGATACTCCG	60.617	CAAGTAACAACGGGTCAGATTTC	59.92	135
Kenaf-1794	CL3105.Contig1_All_1947_4	TGG(3*5)	AAGCCTGTTCGATTTCTCTGATA	59.407	GTAACAACGGGTCAGATTTCGTA	60.282	137
Kenaf-1795	CL3105.Contig1_All_1947_5	TGG(3*5)	AAAGCCTGTTCGATTTCTCTGAT	60.603	GTAACAACGGGTCAGATTTCGTA	60.282	138
Kenaf-1796	CL310.Contig3_All_289_1	CCA(3*7)	TTCACTAATTCATGCAAGCTCAA	59.903	TTGTAGTGAAGGGCAACATCTTT	60.048	127
Kenaf-1797	CL310.Contig3_All_289_2	CCA(3*7)	TTTCACTAATTCATGCAAGCTCA	59.903	TTGTAGTGAAGGGCAACATCTTT	60.048	128
Kenaf-1798	CL310.Contig3_All_289_3	CCA(3*7)	ATATTCCTCTTAGATTGCCGCAT	60.316	TTGTAGTGAAGGGCAACATCTTT	60.048	105
Kenaf-1799	CL310.Contig3_All_289_4	CCA(3*7)	TCAATATTCCTCTTAGATTGCCG	59.616	TTGTAGTGAAGGGCAACATCTTT	60.048	108
Kenaf-1800	CL310.Contig3_All_289_5	CCA(3*7)	AATTCATGCAAGCTCAATATTCC	59.5	TTGTAGTGAAGGGCAACATCTTT	60.048	121
Kenaf-1801	CL3112.Contig3_All_1948_1	TTTC(4*5)	TTGTAAATTTCGGAGTGTTCTTTT	58.37	CAGTGAGATGTTCGAATTTTGAT	58.251	140
Kenaf-1802	CL3112.Contig3_All_1948_2	TTTC(4*5)	ACTTTATGGTTGTGTAAGTGCCG	60.333	AAAACATTAATCTATGGTGTCTACCG	58.909	155
Kenaf-1803	CL3112.Contig3_All_1948_3	TTTC(4*5)	TTGTAAATTTCGGAGTGTTCTTTT	58.37	ACAGTGAGATGTTCGAATTTTGAT	59.072	141
Kenaf-1804	CL3112.Contig3_All_1948_4	TTTC(4*5)	ACTTTATGGTTGTGTAAGTGCCG	60.333	AAACATTAATCTATGGTGTCTACCG	57.738	154
Kenaf-1805	CL3112.Contig3_All_1948_5	TTTC(4*5)	TGTAAATTTCGGAGTGTTCTTTT	57.104	CAGTGAGATGTTCGAATTTTGAT	58.251	139
Kenaf-1806	CL3115.Contig1_All_1949_1	TAT(3*6)	AAATAAACCAACAGAAAACCCGT	60.033	AGAGTGTTCATGGGTTAAAAGCA	60.048	148
Kenaf-1807	CL3115.Contig1_All_1949_2	TAT(3*6)	AAATAAACCAACAGAAAACCCGT	60.033	AGTGTTCATGGGTTAAAAGCAAA	59.926	146
Kenaf-1808	CL3115.Contig1_All_1949_3	TAT(3*6)	AACCAACAGAAAACCCGTTACTT	60.184	AGAGTGTTCATGGGTTAAAAGCA	60.048	143
Kenaf-1809	CL3115.Contig1_All_1949_4	TAT(3*6)	AAACCAACAGAAAACCCGTTACT	60.184	AGAGTGTTCATGGGTTAAAAGCA	60.048	144
Kenaf-1810	CL3115.Contig1_All_1949_5	TAT(3*6)	AACCAACAGAAAACCCGTTACTT	60.184	AGTGTTCATGGGTTAAAAGCAAA	59.926	141
Kenaf-1811	CL311.Contig4_All_290_1	AGAAA(5*4)	CCAAACCAAAACGAAAGTACAAT	59.358	TTTCAGGATTTGATAATTCTGGG	59.344	148
Kenaf-1812	CL311.Contig4_All_290_2	AGAAA(5*4)	ATGCATGGAAAGAAAACCAAAG	60.344	GATTAATCCATCAGCTTTTGCAG	60.108	110
Kenaf-1813	CL311.Contig4_All_290_3	AGAAA(5*4)	CCAAACCAAAACGAAAGTACAAT	59.358	TTTCAGGATTTGATAATTCTGGGT	60.076	148
Kenaf-1814	CL311.Contig4_All_290_4	AGAAA(5*4)	CCAAACCAAAACGAAAGTACAAT	59.358	GTTTCAGGATTTGATAATTCTGGG	60.076	149
Kenaf-1815	CL311.Contig4_All_290_5	AGAAA(5*4)	ATGCATGGAAAGAAAACCAAAG	60.344	CATCAGCTTTTGCAGTGTTCTTA	59.588	102
Kenaf-1816	CL311.Contig5_All_291_1	AAGAA(5*4)	TTAACGCTAAAAATGGCTTTCAA	60.132	GATTAATCCATCAGCTTTTGCAG	60.108	129
Kenaf-1817	CL311.Contig5_All_291_2	AAGAA(5*4)	TTTCAAGGCATTGGATAACAGAC	60.358	CAATGGTGTCCATTTTTGTTTTT	60.01	158
Kenaf-1818	CL311.Contig5_All_291_3	AAGAA(5*4)	TTTCAAGGCATTGGATAACAGAC	60.358	GATTAATCCATCAGCTTTTGCAG	60.108	112
Kenaf-1819	CL311.Contig5_All_291_4	AAGAA(5*4)	CTTTCAAGGCATTGGATAACAGA	60.476	CAATGGTGTCCATTTTTGTTTTT	60.01	159
Kenaf-1820	CL311.Contig7_All_292_1	TTTTC(5*4)	TTTCAGGATTTGATAATTCTGGG	59.344	CCAAACCAAAACGAAAGTACAAT	59.358	148
Kenaf-1821	CL311.Contig7_All_292_2	TTTTC(5*4)	GATTAATCCATCAGCTTTTGCAG	60.108	ATGCATGGAAAGAAAACCAAAG	60.344	110
Kenaf-1822	CL311.Contig7_All_292_3	TTTTC(5*4)	TTCAGGATTTGATAATTCTGGGTT	60.076	CCAAACCAAAACGAAAGTACAAT	59.358	147
Kenaf-1823	CL311.Contig7_All_292_4	TTTTC(5*4)	TTTCAGGATTTGATAATTCTGGGT	60.076	CCAAACCAAAACGAAAGTACAAT	59.358	148
Kenaf-1824	CL311.Contig7_All_292_5	TTTTC(5*4)	GTTTCAGGATTTGATAATTCTGGG	60.076	CCAAACCAAAACGAAAGTACAAT	59.358	149
Kenaf-1825	CL3136.Contig1_All_1959_1	GGA(3*6)	GGAACGTTGTTTAGAGACGGATT	60.735	CGTAACCCTTCCACAAACTCTC	60.033	135
Kenaf-1826	CL3136.Contig1_All_1959_2	GGA(3*6)	GAACGTTGTTTAGAGACGGATTC	59.19	CGTAACCCTTCCACAAACTCTC	60.033	134
Kenaf-1827	CL3136.Contig1_All_1959_3	GGA(3*6)	GTTGTTTAGAGACGGATTCCCAC	61.093	CGTAACCCTTCCACAAACTCTC	60.033	130
Kenaf-1828	CL3136.Contig1_All_1959_4	GGA(3*6)	TTGTTTAGAGACGGATTCCCAC	60.352	CGTAACCCTTCCACAAACTCTC	60.033	129
Kenaf-1829	CL3136.Contig1_All_1959_5	GGA(3*6)	GTTGTTTAGAGACGGATTCCCA	60.352	CGTAACCCTTCCACAAACTCTC	60.033	130
Kenaf-1830	CL3136.Contig2_All_1960_1	GGA(3*6)	GGAACGTTGTTTAGAGACGGATT	60.735	AGCATTCATAGCCAATCCACTAA	60.003	138
Kenaf-1831	CL3136.Contig2_All_1960_2	GGA(3*6)	GAACGTTGTTTAGAGACGGATTC	59.19	AGCATTCATAGCCAATCCACTAA	60.003	137
Kenaf-1832	CL3136.Contig2_All_1960_3	GGA(3*6)	GTTGTTTAGAGACGGATTCCCAC	61.093	AGCATTCATAGCCAATCCACTAA	60.003	133
Kenaf-1833	CL3136.Contig2_All_1960_4	GGA(3*6)	GGAACGTTGTTTAGAGACGGATT	60.735	GCATTCATAGCCAATCCACTAAT	59.394	137
Kenaf-1834	CL3136.Contig2_All_1960_5	GGA(3*6)	TTGTTTAGAGACGGATTCCCAC	60.352	AGCATTCATAGCCAATCCACTAA	60.003	132
Kenaf-1835	CL3147.Contig4_All_1966_1	AAC(3*5)	CTCATGCCTCTACATTTCTCCAC	60.144	GACTCGGAAACCTCCATTTCTAT	59.86	155
Kenaf-1836	CL3147.Contig4_All_1966_2	AAC(3*5)	ACTCATGCCTCTACATTTCTCCA	60.144	GACTCGGAAACCTCCATTTCTAT	59.86	156
Kenaf-1837	CL3147.Contig4_All_1966_3	AAC(3*5)	CTCATGCCTCTACATTTCTCCAC	60.144	CTCGGAAACCTCCATTTCTATTC	60.308	153
Kenaf-1838	CL3147.Contig4_All_1966_4	AAC(3*5)	ACTCATGCCTCTACATTTCTCCA	60.144	CTCGGAAACCTCCATTTCTATTC	60.308	154
Kenaf-1839	CL3147.Contig4_All_1966_5	AAC(3*5)	CTCATGCCTCTACATTTCTCCAC	60.144	ACTCGGAAACCTCCATTTCTATT	59.416	154
Kenaf-1840	CL3152.Contig1_All_1967_1	ACAGAG(6*4)	AGTGAGCAAATCAGGCATAGAAA	60.27	GTCAAGAAATTCGAAGCCAAGTA	59.786	144
Kenaf-1841	CL3152.Contig1_All_1967_2	ACAGAG(6*4)	AAGTGAGCAAATCAGGCATAGAA	60.27	GTCAAGAAATTCGAAGCCAAGTA	59.786	145
Kenaf-1842	CL3152.Contig1_All_1967_3	ACAGAG(6*4)	GTGAGCAAATCAGGCATAGAAAA	60.609	GTCAAGAAATTCGAAGCCAAGTA	59.786	143
Kenaf-1843	CL3152.Contig1_All_1967_4	ACAGAG(6*4)	AACACTCAAGTGAGCAAATCAGG	60.705	GTCAAGAAATTCGAAGCCAAGTA	59.786	152
Kenaf-1844	CL3152.Contig1_All_1967_5	ACAGAG(6*4)	TGAGCAAATCAGGCATAGAAAAG	60.725	GTCAAGAAATTCGAAGCCAAGTA	59.786	142
Kenaf-1845	CL3152.Contig2_All_1968_1	CTCTGT(6*4)	GTCAAGAAATTCGAAGCCAAGTA	59.786	AGTGAGCAAATCAGGCATAGAAA	60.27	144
Kenaf-1846	CL3152.Contig2_All_1968_2	CTCTGT(6*4)	GTCAAGAAATTCGAAGCCAAGTA	59.786	AAGTGAGCAAATCAGGCATAGAA	60.27	145
Kenaf-1847	CL3152.Contig2_All_1968_3	CTCTGT(6*4)	GTCAAGAAATTCGAAGCCAAGTA	59.786	GTGAGCAAATCAGGCATAGAAAA	60.609	143
Kenaf-1848	CL3152.Contig2_All_1968_4	CTCTGT(6*4)	GTCAAGAAATTCGAAGCCAAGTA	59.786	AACACTCAAGTGAGCAAATCAGG	60.705	152
Kenaf-1849	CL3152.Contig2_All_1968_5	CTCTGT(6*4)	GTCAAGAAATTCGAAGCCAAGTA	59.786	TGAGCAAATCAGGCATAGAAAAG	60.725	142
Kenaf-1850	CL3157.Contig4_All_1970_3	AGAAGG(6*4)	ACCTCGTTCTGTTTCAGTCCC	60.538	GAATCGATCTGACTTCACCGAT	60.472	160
Kenaf-1851	CL3170.Contig2_All_1971_1	AAG(3*5)	AAATACAAGCTGTCTGCCTCAAC	59.839	TAACCTTTGCACAGGAAATGAGT	60.048	123
Kenaf-1852	CL3170.Contig2_All_1971_2	AAG(3*5)	ACAAAATACAAGCTGTCTGCCTC	59.839	TAACCTTTGCACAGGAAATGAGT	60.048	126
Kenaf-1853	CL3170.Contig2_All_1971_3	AAG(3*5)	TCTGCCTCAACTGTAATGAAACA	59.799	TAACCTTTGCACAGGAAATGAGT	60.048	111
Kenaf-1854	CL3170.Contig2_All_1971_4	AAG(3*5)	TGTCTGCCTCAACTGTAATGAAA	59.799	TAACCTTTGCACAGGAAATGAGT	60.048	113
Kenaf-1855	CL3170.Contig2_All_1971_5	AAG(3*5)	ACCAAATTCTTGGAACATGTCTG	60.268	TAACCTTTGCACAGGAAATGAGT	60.048	160
Kenaf-1856	CL321.Contig2_All_293_1	TCG(3*6)	GAGGCTTAAACGAATACGACTGG	61.305	CCTCAAACGTCTCCCTAAAGACT	60.168	152
Kenaf-1857	CL321.Contig2_All_293_2	TCG(3*6)	AGGCTTAAACGAATACGACTGG	59.687	CCTCAAACGTCTCCCTAAAGACT	60.168	151
Kenaf-1858	CL321.Contig2_All_293_3	TCG(3*6)	GAGGCTTAAACGAATACGACTGG	61.305	TCCTCAAACGTCTCCCTAAAGAC	60.977	153
Kenaf-1859	CL321.Contig2_All_293_4	TCG(3*6)	GGAGGCTTAAACGAATACGACTG	61.305	TCCTCAAACGTCTCCCTAAAGAC	60.977	154
Kenaf-1860	CL321.Contig2_All_293_5	TCG(3*6)	AGGCTTAAACGAATACGACTGG	59.687	TCCTCAAACGTCTCCCTAAAGAC	60.977	152
Kenaf-1861	CL321.Contig3_All_294_1	ATG(3*5)	TTCATAAGCAGAGGGATGTTGTT	60.014	TCTTCATCGTAGTCTCCCTCATC	59.727	148
Kenaf-1862	CL321.Contig3_All_294_2	ATG(3*5)	TTCATAAGCAGAGGGATGTTGTT	60.014	TCATCTTCATCGTAGTCTCCCTC	59.727	151
Kenaf-1863	CL321.Contig3_All_294_3	ATG(3*5)	TTTCATAAGCAGAGGGATGTTGT	60.014	TCTTCATCGTAGTCTCCCTCATC	59.727	149
Kenaf-1864	CL321.Contig3_All_294_4	ATG(3*5)	TTTCATAAGCAGAGGGATGTTGT	60.014	TCATCTTCATCGTAGTCTCCCTC	59.727	152
Kenaf-1865	CL321.Contig3_All_294_5	ATG(3*5)	ATGTTGTTCCGTTGGATATGAAT	59.498	GAAACTTGAGCATCATCGGTATC	59.986	157
Kenaf-1866	CL3229.Contig3_All_1989_1	TTC(3*5)	GAGAATATGAGATCCCTCCTTCG	60.41	CTAAATACCATCCAACAAACCCA	59.991	105
Kenaf-1867	CL3229.Contig3_All_1989_2	TTC(3*5)	GAGAATATGAGATCCCTCCTTCG	60.41	CGAGGAAGTAACGCTCTTTGTTA	59.959	152
Kenaf-1868	CL3229.Contig3_All_1989_3	TTC(3*5)	GAGAATATGAGATCCCTCCTTCG	60.41	CCATTCCTAAATACCATCCAACA	59.957	111
Kenaf-1869	CL3229.Contig3_All_1989_4	TTC(3*5)	GAGAATATGAGATCCCTCCTTCG	60.41	CACCATTCCTAAATACCATCCAA	59.957	113
Kenaf-1870	CL323.Contig6_All_297_1	TGA(3*6)	GAAAAGCAAACATTCTGATGAGG	60.122	CTGCTCTTGTATACGCTGTTGAG	59.255	148
Kenaf-1871	CL323.Contig6_All_297_2	TGA(3*6)	GAAAAGCAAACATTCTGATGAGG	60.122	CTCAACTGCTCTTGTATACGCTG	59.255	153
Kenaf-1872	CL323.Contig6_All_297_3	TGA(3*6)	GAAAAGCAAACATTCTGATGAGG	60.122	AACAGCACTCAACTGCTCTTGTA	59.25	160
Kenaf-1873	CL323.Contig6_All_297_4	TGA(3*6)	GAAAAGCAAACATTCTGATGAGG	60.122	ACTGCTCTTGTATACGCTGTTGA	59.124	149
Kenaf-1874	CL323.Contig6_All_297_5	TGA(3*6)	GAAAAGCAAACATTCTGATGAGG	60.122	TCAACTGCTCTTGTATACGCTGT	59.124	152
Kenaf-1875	CL3243.Contig1_All_1993_1	AGA(3*7)	AATGGTGGGGTAAAGGTTGTTA	59.518	AAATGGATTCTCAATACCCGAAC	60.419	122
Kenaf-1876	CL3243.Contig1_All_1993_2	AGA(3*7)	AATGGTGGGGTAAAGGTTGTTA	59.518	ACGGAAAATGGATTCTCAATACC	60.419	127
Kenaf-1877	CL3243.Contig1_All_1993_3	AGA(3*7)	GAAGGAGGATATGAGTAGCCGTT	60.004	ATCCAAACAACCCCAGAAATC	60.046	158
Kenaf-1878	CL3243.Contig1_All_1993_4	AGA(3*7)	GAAGGAGGATATGAGTAGCCGTT	60.004	GATCCAAACAACCCCAGAAAT	60.046	159
Kenaf-1879	CL3243.Contig1_All_1993_5	AGA(3*7)	AATGGTGGGGTAAAGGTTGTTA	59.518	AAACCTTCTTTTTACCCGGAAGT	60.569	96
Kenaf-1880	CL3243.Contig2_All_1994_1	AGA(3*7)	AATGGTGGGGTAAAGGTTGTTA	59.518	TCCTTGCAAAGAATCAAGGATAA	60.082	146
Kenaf-1881	CL3243.Contig2_All_1994_2	AGA(3*7)	CAATGGTGGGGTAAAGGTTGTTA	61.982	TCCTTGCAAAGAATCAAGGATAA	60.082	147
Kenaf-1882	CL3243.Contig2_All_1994_3	AGA(3*7)	GTCAATGGTGGGGTAAAGGTT	59.969	TCCTTGCAAAGAATCAAGGATAA	60.082	149
Kenaf-1883	CL3243.Contig2_All_1994_4	AGA(3*7)	AATGGTGGGGTAAAGGTTGTTA	59.518	CCTTGCAAAGAATCAAGGATAAG	59.298	145
Kenaf-1884	CL3243.Contig2_All_1994_5	AGA(3*7)	AATGGTGGGGTAAAGGTTGTT	59.491	TCCTTGCAAAGAATCAAGGATAA	60.082	146
Kenaf-1885	CL324.Contig8_All_315_2	CTT(3*5)	TTCAAATCAATGTCCATACTCCC	60.068	GTTGTTATCTTGGGGATTGAGGT	60.46	119
Kenaf-1886	CL324.Contig8_All_315_3	CTT(3*5)	AAATGCAAGCAATGAACTCTCTC	59.912	GTTGTTATCTTGGGGATTGAGGT	60.46	149
Kenaf-1887	CL324.Contig8_All_315_4	CTT(3*5)	GAAATGCAAGCAATGAACTCTCT	59.912	GTTGTTATCTTGGGGATTGAGGT	60.46	150
Kenaf-1888	CL324.Contig8_All_315_5	CTT(3*5)	TACTCCCCATGCTGACTTCTTAG	59.791	GTTGTTATCTTGGGGATTGAGGT	60.46	103
Kenaf-1889	CL324.Contig8_All_317_1	GAT(3*5)	AAATCAACGGTGGACATGATAGT	59.65	GTTATGGAATTGGAACCTTCTCC	60.069	148
Kenaf-1890	CL324.Contig8_All_317_2	GAT(3*5)	CAACGGTGGACATGATAGTAACC	60.528	GTTATGGAATTGGAACCTTCTCC	60.069	144
Kenaf-1891	CL324.Contig8_All_317_3	GAT(3*5)	AAATCAACGGTGGACATGATAGT	59.65	ATGGAAGTTATGGAATTGGAACC	60.297	154
Kenaf-1892	CL324.Contig8_All_317_4	GAT(3*5)	AAATCAACGGTGGACATGATAGT	59.65	CATGGAAGTTATGGAATTGGAAC	59.601	155
Kenaf-1893	CL324.Contig8_All_317_5	GAT(3*5)	GGACATGATAGTAACCCTTTCCA	59.255	GTTATGGAATTGGAACCTTCTCC	60.069	137
Kenaf-1894	CL324.Contig9_All_318_1	GCG(3*5)	CCACCTTCTGCTACAATCGAG	59.883	CTAATAATGGTCAGTCAGACGCC	60.035	160
Kenaf-1895	CL324.Contig9_All_318_2	GCG(3*5)	ACCACCTTCTGCTACAATCGAG	60.68	TAATAATGGTCAGTCAGACGCC	59.114	160
Kenaf-1896	CL324.Contig9_All_318_3	GCG(3*5)	CCACCTTCTGCTACAATCGAG	59.883	TAATAATGGTCAGTCAGACGCC	59.114	159
Kenaf-1897	CL324.Contig9_All_318_4	GCG(3*5)	ACCACCTTCTGCTACAATCGAG	60.68	AATAATGGTCAGTCAGACGCC	59.069	159
Kenaf-1898	CL324.Contig9_All_318_5	GCG(3*5)	AACCACCTTCTGCTACAATCGAG	61.863	AATAATGGTCAGTCAGACGCC	59.069	160
Kenaf-1899	CL3250.Contig2_All_1995_1	AAG(3*6)	TTCATTCAGAGATTTTATCAAAGTGC	60.034	CCGGTCTTCTTCCTTCTCATATT	59.978	159
Kenaf-1900	CL3250.Contig2_All_1995_2	AAG(3*6)	TGCTATACTGAAATCTTTATCGATGG	59.923	CCGGTCTTCTTCCTTCTCATATT	59.978	133
Kenaf-1901	CL3250.Contig2_All_1995_3	AAG(3*6)	TTCATTCAGAGATTTTATCAAAGTGC	60.034	TCTTCCTTCTCATATTCCCTTCC	59.925	152
Kenaf-1902	CL3250.Contig2_All_1995_4	AAG(3*6)	TCAAAGTGCTGCTATACTGAAATCTT	59.889	CCGGTCTTCTTCCTTCTCATATT	59.978	142
Kenaf-1903	CL3250.Contig2_All_1995_5	AAG(3*6)	TTCATTCAGAGATTTTATCAAAGTGC	60.034	CTCATATTCCCTTCCCAATATCC	59.896	144
Kenaf-1904	CL3251.Contig2_All_1997_1	TC(2*6)	GGGGTTTCACTTTTGTTTTTCTT	59.793	ACTTCAAAAGAACACCTGGAACA	60.061	158
Kenaf-1905	CL3251.Contig2_All_1997_2	TC(2*6)	TCTCTCCACTTTCTTTCATCCAA	60.228	ACTTCAAAAGAACACCTGGAACA	60.061	133
Kenaf-1906	CL3251.Contig2_All_1997_3	TC(2*6)	GGGGTTTCACTTTTGTTTTTCTT	59.793	CCTCCAATTTGCATTACTTTTCA	60.342	116
Kenaf-1907	CL3251.Contig2_All_1997_4	TC(2*6)	TCTCTCCACTTTCTTTCATCCAA	60.228	CCTCCAATTTGCATTACTTTTCA	60.342	91
Kenaf-1908	CL3251.Contig2_All_1997_5	TC(2*6)	GGGGTTTCACTTTTGTTTTTCTT	59.793	CAAAAGAACACCTGGAACAAGAT	59.552	154
Kenaf-1909	CL3251.Contig3_All_1998_2	TGG(3*6)	CATTTCCCCTTGTCCATATTTCT	60.411	AATGGTACCACAAAATCCCAAG	59.98	160
Kenaf-1910	CL3251.Contig3_All_1998_4	TGG(3*6)	CATTTCCCCTTGTCCATATTTCT	60.411	CCGGTAGTTGTTTCTAAGCTTGT	58.941	127
Kenaf-1911	CL3251.Contig3_All_1998_5	TGG(3*6)	CATTTCCCCTTGTCCATATTTCT	60.411	GTACCACAAAATCCCAAGGAAA	60.089	156
Kenaf-1912	CL3256.Contig3_All_1999_1	AT(2*6)	AACAGTTTTTGGTGGTTGAATTG	60.169	CAGGAATACTGACCTCACCAAAC	59.914	113
Kenaf-1913	CL3256.Contig3_All_1999_2	AT(2*6)	CAGTTTTTGGTGGTTGAATTGTT	60.169	CCAAACCTAAACTTAAGTGCCAA	59.6	94
Kenaf-1914	CL3256.Contig3_All_1999_3	AT(2*6)	AACAGTTTTTGGTGGTTGAATTG	60.169	CCAAACCTAAACTTAAGTGCCAA	59.6	96
Kenaf-1915	CL3256.Contig3_All_1999_4	AT(2*6)	TAGGTCAACAGTTTTTGGTGGTT	59.827	CCAAACCTAAACTTAAGTGCCAA	59.6	102
Kenaf-1916	CL3256.Contig3_All_1999_5	AT(2*6)	TTAGGTCAACAGTTTTTGGTGGT	59.827	CCAAACCTAAACTTAAGTGCCAA	59.6	103
Kenaf-1917	CL3287.Contig1_All_2000_5	GGA(3*6)	TGATAAACACCCAGAATTCCAAG	60.223	ATACAGAATGTTGGGATGGTTTC	59.127	144
Kenaf-1918	CL328.Contig4_All_336_1	CT(2*6)	CGTAGTACTTTGCCAGATGTTCC	60.069	CTTGTCCTGGATCTGAATGAGAC	60.125	118
Kenaf-1919	CL328.Contig4_All_336_2	CT(2*6)	CATCAACTCCAGGTCTTTTGAAG	60.151	TACTGAGCCAACCTCAGATAAGC	59.926	152
Kenaf-1920	CL3293.Contig2_All_2008_1	TC(2*6)	TATTATTTGGGTTTGGAGGGATT	59.816	TGCTTGGCGTTAACTACTTTTCT	59.523	143
Kenaf-1921	CL3293.Contig2_All_2008_2	TC(2*6)	TATTATTTGGGTTTGGAGGGATT	59.816	CTGCTTGGCGTTAACTACTTTTC	59.523	144
Kenaf-1922	CL3293.Contig2_All_2008_3	TC(2*6)	TATTATTTGGGTTTGGAGGGATT	59.816	TCTGCTTGGCGTTAACTACTTTT	59.523	145
Kenaf-1923	CL3293.Contig2_All_2008_4	TC(2*6)	TTATTATTTGGGTTTGGAGGGAT	59.816	TGCTTGGCGTTAACTACTTTTCT	59.523	144
Kenaf-1924	CL3293.Contig2_All_2008_5	TC(2*6)	TTATTATTTGGGTTTGGAGGGAT	59.816	CTGCTTGGCGTTAACTACTTTTC	59.523	145
Kenaf-1925	CL3293.Contig3_All_2009_1	AG(2*11)	TAGCTTCCTAAGAAACGCATGAC	59.932	ATCTCGTCAACTCATCTCCATGT	60.016	90
Kenaf-1926	CL3293.Contig3_All_2009_2	AG(2*11)	TAGCTTCCTAAGAAACGCATGAC	59.932	ATTGCCGCGTATATCTTTTTACA	59.909	127
Kenaf-1927	CL3293.Contig3_All_2009_3	AG(2*11)	TAGCTTCCTAAGAAACGCATGAC	59.932	ACCTATTGCCGCGTATATCTTTT	60.241	131
Kenaf-1928	CL3293.Contig3_All_2009_4	AG(2*11)	TTAGCTTCCTAAGAAACGCATGA	60.38	ATCTCGTCAACTCATCTCCATGT	60.016	91
Kenaf-1929	CL3293.Contig3_All_2009_5	AG(2*11)	TAGCTTCCTAAGAAACGCATGAC	59.932	ACCACACAAGTTTCACCTATTGC	60.329	145
Kenaf-1930	CL3340.Contig4_All_2018_1	AAG(3*6)	ATCGCGGGAATTAAAATGAAAAC	62.343	CTGATCCAAATGGAAATGAAAAA	60.168	156
Kenaf-1931	CL3340.Contig4_All_2018_2	AAG(3*6)	ATCGCGGGAATTAAAATGAAAAC	62.343	ACTGATCCAAATGGAAATGAAAA	59.708	157
Kenaf-1932	CL3340.Contig4_All_2018_3	AAG(3*6)	ATCGCGGGAATTAAAATGAAA	60.613	CTGATCCAAATGGAAATGAAAAA	60.168	156
Kenaf-1933	CL3340.Contig4_All_2018_4	AAG(3*6)	AATCGCGGGAATTAAAATGAA	60.613	CTGATCCAAATGGAAATGAAAAA	60.168	157
Kenaf-1934	CL3340.Contig4_All_2018_5	AAG(3*6)	GCGGGAATTAAAATGAAAACG	60.641	CTGATCCAAATGGAAATGAAAAA	60.168	153
Kenaf-1935	CL3349.Contig2_All_2023_1	GAA(3*5)	TTTCCTTGGGGTCTAAGAAAAAG	59.989	ACAGTTGGCTTTGGAGAAACTCT	60.678	97
Kenaf-1936	CL3349.Contig2_All_2023_2	GAA(3*5)	AGCAGATTAATAGGAGTGGGAGC	60.128	ACAGTTGGCTTTGGAGAAACTCT	60.678	160
Kenaf-1937	CL3349.Contig2_All_2023_3	GAA(3*5)	AAAATGGTGTTTCCAGTTTCCTT	60.134	ACAGTTGGCTTTGGAGAAACTCT	60.678	113
Kenaf-1938	CL3349.Contig2_All_2023_4	GAA(3*5)	AGGGTTTCTTTTGAAAATGGTGT	60.134	ACAGTTGGCTTTGGAGAAACTCT	60.678	126
Kenaf-1939	CL3349.Contig2_All_2023_5	GAA(3*5)	TTTTGAAAATGGTGTTTCCAGTT	59.78	ACAGTTGGCTTTGGAGAAACTCT	60.678	118
Kenaf-1940	CL3349.Contig3_All_2024_1	GAA(3*5)	TTTCCTTGGGGTCTAAGAAAAAG	59.989	TTGGCTTTGAGGAAACTTTGTAA	60.147	93
Kenaf-1941	CL3349.Contig3_All_2024_2	GAA(3*5)	TTGGATAATGGAGGGTTTCTTTT	60.064	TTGGCTTTGAGGAAACTTTGTAA	60.147	133
Kenaf-1942	CL3349.Contig3_All_2024_3	GAA(3*5)	AGCAGATTAATAGGAGTGGGAGC	60.128	TTGGCTTTGAGGAAACTTTGTAA	60.147	156
Kenaf-1943	CL3349.Contig3_All_2024_4	GAA(3*5)	AGGGTTTCTTTTGAAAATGGTGT	60.134	TTGGCTTTGAGGAAACTTTGTAA	60.147	122
Kenaf-1944	CL3349.Contig3_All_2024_5	GAA(3*5)	TTTCCTTGGGGTCTAAGAAAAAG	59.989	GTTGGCTTTGAGGAAACTTTGTA	59.695	94
Kenaf-1945	CL3350.Contig3_All_2025_1	GCA(3*5)	ACCATCTTGGTTGTTATGGATGA	60.477	CAAAACCAAGAAACAGCCTACAC	60.082	90
Kenaf-1946	CL3350.Contig3_All_2025_2	GCA(3*5)	ACCATCTTGGTTGTTATGGATGA	60.477	ACAAAACCAAGAAACAGCCTACA	60.082	91
Kenaf-1947	CL3350.Contig3_All_2025_3	GCA(3*5)	CACATTAAAAGGGGTTTTAAGCA	59.46	CAAAACCAAGAAACAGCCTACAC	60.082	135
Kenaf-1948	CL3350.Contig3_All_2025_4	GCA(3*5)	CACATTAAAAGGGGTTTTAAGCA	59.46	ACAAAACCAAGAAACAGCCTACA	60.082	136
Kenaf-1949	CL3350.Contig3_All_2025_5	GCA(3*5)	TTAAAAGGGGTTTTAAGCATTCG	60.638	CAAAACCAAGAAACAGCCTACAC	60.082	131
Kenaf-1950	CL3354.Contig1_All_2027_1	TA(2*10)	TATTGCAATGGAGAGGTTGACTT	60.014	AAAGCCTGAGCTAAACAGTGATG	59.961	145
Kenaf-1951	CL3354.Contig1_All_2027_2	TA(2*10)	TTATTGCAATGGAGAGGTTGACT	60.014	AAAGCCTGAGCTAAACAGTGATG	59.961	146
Kenaf-1952	CL3354.Contig1_All_2027_3	TA(2*10)	GGAGAGGTTGACTTCAGACTTGA	59.908	AAAGCCTGAGCTAAACAGTGATG	59.961	136
Kenaf-1953	CL3354.Contig1_All_2027_4	TA(2*10)	TATTGCAATGGAGAGGTTGACTT	60.014	AAGCCTGAGCTAAACAGTGATGT	59.49	144
Kenaf-1954	CL3354.Contig1_All_2027_5	TA(2*10)	TTATTGCAATGGAGAGGTTGACT	60.014	AAGCCTGAGCTAAACAGTGATGT	59.49	145
Kenaf-1955	CL3355.Contig2_All_2028_1	GAA(3*5)	TCTCTTTGATTAATGGAGTCGGA	60.082	AGGAAAGGGTTCTGTTTCTTTTG	60.025	157
Kenaf-1956	CL3355.Contig2_All_2028_2	GAA(3*5)	TCAAACAATTTAGAAAAACCGGA	59.872	AGGAAAGGGTTCTGTTTCTTTTG	60.025	133
Kenaf-1957	CL3355.Contig2_All_2028_3	GAA(3*5)	TCTCTTTGATTAATGGAGTCGGA	60.082	TTCTGTTTCTTTTGAGAAGTGGC	59.92	148
Kenaf-1958	CL3355.Contig2_All_2028_4	GAA(3*5)	TCAAACAATTTAGAAAAACCGGA	59.872	TTCTGTTTCTTTTGAGAAGTGGC	59.92	124
Kenaf-1959	CL3355.Contig2_All_2028_5	GAA(3*5)	TCTCTTTGATTAATGGAGTCGGA	60.082	GAAGTGGCTGACGTAAAGAATTG	60.176	133
Kenaf-1960	CL3362.Contig2_All_2029_1	CAG(3*5)	ACAAATCTTCAGCTCTCCAAATG	59.776	CAATCCTGACCATATTTCCCATA	59.922	156
Kenaf-1961	CL3362.Contig2_All_2029_2	CAG(3*5)	ACAAATCTTCAGCTCTCCAAATG	59.776	ATCCTGACCATATTTCCCATACC	60.161	154
Kenaf-1962	CL3362.Contig2_All_2029_3	CAG(3*5)	ACAAATCTTCAGCTCTCCAAATG	59.776	ACCTAGTCCCATCATTTTCCTCT	59.394	125
Kenaf-1963	CL3362.Contig2_All_2029_4	CAG(3*5)	CAACAAATCTTCAGCTCTCCAAA	60.755	CAATCCTGACCATATTTCCCATA	59.922	158
Kenaf-1964	CL3362.Contig2_All_2029_5	CAG(3*5)	GTCAACAAATCTTCAGCTCTCCA	60.787	CAATCCTGACCATATTTCCCATA	59.922	160
Kenaf-1965	CL3362.Contig3_All_2030_1	GCT(3*5)	CAATCCTGACCATATTTCCCATA	59.922	ACAAATCTTCAGCTCTCCAAATG	59.776	156
Kenaf-1966	CL3362.Contig3_All_2030_2	GCT(3*5)	ATCCTGACCATATTTCCCATACC	60.161	ACAAATCTTCAGCTCTCCAAATG	59.776	154
Kenaf-1967	CL3362.Contig3_All_2030_3	GCT(3*5)	ACCTAGTCCCATCATTTTCCTCT	59.394	ACAAATCTTCAGCTCTCCAAATG	59.776	125
Kenaf-1968	CL3362.Contig3_All_2030_4	GCT(3*5)	CAATCCTGACCATATTTCCCATA	59.922	CAACAAATCTTCAGCTCTCCAAA	60.755	158
Kenaf-1969	CL3362.Contig3_All_2030_5	GCT(3*5)	CAATCCTGACCATATTTCCCATA	59.922	GTCAACAAATCTTCAGCTCTCCA	60.787	160
Kenaf-1970	CL3375.Contig3_All_2034_1	GTT(3*5)	TTGTTTGCAACATTTCATCATTC	59.867	ATCTTAATGCACGGTCAAAACAT	59.791	109
Kenaf-1971	CL3375.Contig3_All_2034_2	GTT(3*5)	TTTGCAACATTTCATCATTCATC	59.83	ATCTTAATGCACGGTCAAAACAT	59.791	106
Kenaf-1972	CL3375.Contig3_All_2034_3	GTT(3*5)	TTGTTTGCAACATTTCATCATTC	59.867	TGAACAAAAATGGTCGAGTTACC	60.263	158
Kenaf-1973	CL3375.Contig3_All_2034_4	GTT(3*5)	CAACATTTCATCATTCATCATCG	60.203	ATCTTAATGCACGGTCAAAACAT	59.791	102
Kenaf-1974	CL3375.Contig3_All_2034_5	GTT(3*5)	TTGTTTGCAACATTTCATCATTC	59.867	ACATCTTAATGCACGGTCAAAAC	60.29	111
Kenaf-1975	CL3386.Contig3_All_2038_1	TCG(3*5)	GTGCTCATCCTTACCACTACCAC	59.942	AGGAAGAGAAGAGAGGAGCAGAC	59.791	157
Kenaf-1976	CL3386.Contig3_All_2038_2	TCG(3*5)	GCTCATCCTTACCACTACCACTG	60.068	AGGAAGAGAAGAGAGGAGCAGAC	59.791	155
Kenaf-1977	CL3386.Contig3_All_2038_3	TCG(3*5)	TGCTCATCCTTACCACTACCACT	60.068	AGGAAGAGAAGAGAGGAGCAGAC	59.791	156
Kenaf-1978	CL3386.Contig3_All_2038_4	TCG(3*5)	GTGCTCATCCTTACCACTACCAC	59.942	GCATGAGTAAGAATAACGCCACT	59.706	83
Kenaf-1979	CL3386.Contig3_All_2038_5	TCG(3*5)	GCTCATCCTTACCACTACCACTG	60.068	GCATGAGTAAGAATAACGCCACT	59.706	81
Kenaf-1980	CL3386.Contig4_All_2039_1	CGA(3*5)	AGGAAGAGAAGAGAGGAGCAGAC	59.791	GTGCTCATCCTTACCACTACCAC	59.942	157
Kenaf-1981	CL3386.Contig4_All_2039_2	CGA(3*5)	AGGAAGAGAAGAGAGGAGCAGAC	59.791	GCTCATCCTTACCACTACCACTG	60.068	155
Kenaf-1982	CL3386.Contig4_All_2039_3	CGA(3*5)	AGGAAGAGAAGAGAGGAGCAGAC	59.791	TGCTCATCCTTACCACTACCACT	60.068	156
Kenaf-1983	CL3399.Contig7_All_2040_1	ACC(3*5)	AAAGCTTCAAACTGTCAACATCC	59.688	TATTCTAGTCGTGGTATGGGTGG	60.136	119
Kenaf-1984	CL3399.Contig7_All_2040_2	ACC(3*5)	AACTGTCAACATCCTACACCAGC	60.47	TATTCTAGTCGTGGTATGGGTGG	60.136	110
Kenaf-1985	CL3399.Contig7_All_2040_3	ACC(3*5)	AAAGCTTCAAACTGTCAACATCC	59.688	GATCTGATGCTGGTGGTAGTTCT	59.657	154
Kenaf-1986	CL3399.Contig7_All_2040_4	ACC(3*5)	AAGCTTCAAACTGTCAACATCCT	59.336	TATTCTAGTCGTGGTATGGGTGG	60.136	118
Kenaf-1987	CL3399.Contig7_All_2040_5	ACC(3*5)	CAAACTGTCAACATCCTACACCA	59.944	TCATCCATGTATTCTAGTCGTGG	58.986	121
Kenaf-1988	CL3399.Contig9_All_2042_1	GGT(3*5)	TATTCTAGTCGTGGTATGGGTGG	60.136	GAGTGCAACATGAAGAGGAATG	59.74	113
Kenaf-1989	CL3399.Contig9_All_2042_2	GGT(3*5)	TATTCTAGTCGTGGTATGGGTGG	60.136	AGGAGTGCAACATGAAGAGGAAT	61.379	115
Kenaf-1990	CL3399.Contig9_All_2042_3	GGT(3*5)	TATTCTAGTCGTGGTATGGGTGG	60.136	TCAAGGAGTGCAACATGAAGAG	60.431	118
Kenaf-1991	CL3399.Contig9_All_2042_4	GGT(3*5)	GATCTGATGCTGGTGGTAGTTCT	59.657	GAGTGCAACATGAAGAGGAATG	59.74	148
Kenaf-1992	CL3399.Contig9_All_2042_5	GGT(3*5)	TATTCTAGTCGTGGTATGGGTGG	60.136	GGAGTGCAACATGAAGAGGAAT	60.505	114
Kenaf-1993	CL33.Contig2_All_30_3	CCT(3*6)	AACAACTCCCTTCCCCTCAC	60.349	GACTCCGAGTTACAGGATCAGAA	59.765	120
Kenaf-1994	CL33.Contig2_All_30_4	CCT(3*6)	AACAACTCCCTTCCCCTCAC	60.349	CCGAGTTACAGGATCAGAACACT	59.69	116
Kenaf-1995	CL3403.Contig1_All_2043_1	TCTCG(5*4)	GACGTGGATTTTGTTATCTGCTC	60.021	CTCCTTCTTCTCAACAAAGCAAA	60.042	149
Kenaf-1996	CL3403.Contig1_All_2043_2	TCTCG(5*4)	GACGTGGATTTTGTTATCTGCTC	60.021	TCCTTCTTCTCAACAAAGCAAAC	59.92	148
Kenaf-1997	CL3403.Contig1_All_2043_3	TCTCG(5*4)	CGTGGATTTTGTTATCTGCTCTC	60.143	CTCCTTCTTCTCAACAAAGCAAA	60.042	147
Kenaf-1998	CL3403.Contig1_All_2043_4	TCTCG(5*4)	CGTGGATTTTGTTATCTGCTCTC	60.143	TCCTTCTTCTCAACAAAGCAAAC	59.92	146
[truncated: 7,326 more rows]
